# Supplementary material for: Visible-light-induced bifunctionalisation of (homo)propargylic amines with CO2 and arylsulfinates
Source: Royal Society of Chemistry journal article supplement (doi:10.1039/d3cc04160c), 2023-01-01
Supplement: d3cc04160c2.pdf [file d3cc04160c2.pdf]

## Electronic Supporting Information

### Visible-Light-Induced Bifunctionalisation of (Homo)Propargylic Amines with CO<sub>2</sub> and Arylsulfonates

Mandapati Bhargava Reddy<sup>a,b</sup> and Eoghan M. McGarrigle<sup>\*a,b</sup>

<sup>a</sup>Centre for Synthesis & Chemical Biology, *UCD School of Chemistry, University College Dublin, Belfield, Dublin 4, Ireland*

<sup>b</sup>A2P CDT in Sustainable Chemistry and BiOrbic Bioeconomy SFI Research Centre, *University College Dublin, Belfield, Dublin 4, Ireland.*

*email: eoghan.mcgarrigle@ucd.ie*

| <b><u>S.No</u></b> | <b><u>Table of contents</u></b>                          | <b><u>Pages</u></b> |
|--------------------|----------------------------------------------------------|---------------------|
| 1                  | General considerations                                   | S2                  |
| 2                  | General procedures and spectral data                     | S3-S13              |
| 3                  | Intermediate trapping experiment                         | S14                 |
| 4                  | X-ray crystallographic studies of compound 4a            | S15-S18             |
| 5                  | References                                               | S18                 |
| 6                  | Copies of <sup>1</sup> H and <sup>13</sup> C NMR spectra | S19-S76             |

## 1. General considerations

Chemicals were purchased and used without further purification unless otherwise stated. The  $^1\text{H}$  and  $^{13}\text{C}$  NMR spectra were recorded in  $\text{CDCl}_3$  on Varian VNMR spectrometers (400 and 500 MHz for  $^1\text{H}$  NMR; 101 and 126 MHz for  $^{13}\text{C}$  NMR) with TMS as an internal standard. Mass spectra were recorded on Agilent-6546-QToF spectrometer. TLC was performed on using Merck pre-coated TLC plates (Merck 60 F<sub>254</sub>) and detected under UV light. Flash column chromatography (FCC) was performed using either silica gel [Davisil, 230-400 mesh (40-63  $\mu\text{m}$ )] or using a Biotage Isolera® UV-VIS Flash Purification System Version 2.3.1 with Sfar Silica HC D (20  $\mu\text{m}$ ) prepacked silica cartridges.

### Details of Light source:

Manufacturer: Kessil; Model: PR160L; Wavelength: 456 nm, Distance: 5 cm. Manufacturer gives spectral width as ~430-510 nm with radiant flux max at 456 nm of ~0.3 W/nm and ‘average intensity of PR160 series’ as 399mW/cm<sup>2</sup> (measured from 1 cm distance), max power consumption 50W.

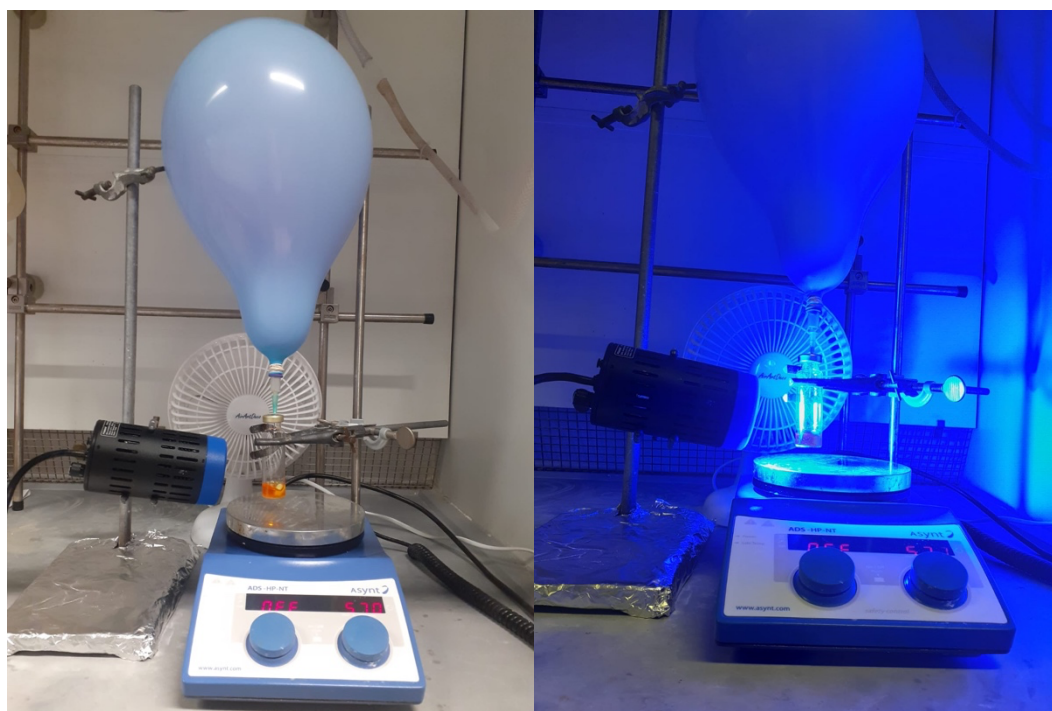

**Fig. S1.** Reaction setup for photochemical carboxylative sulfonylation reactions.

## 2. General procedures and spectroscopic data

### 2.1 General procedure for synthesis of *N*-Benzylpropargylamine (1aa-1au).

Propargylamines were synthesized using the literature procedure.<sup>1,2</sup>

Propargyl bromide (1 equiv.) was added dropwise to the solution of benzylamine (6 equiv.). The reaction was stirred 15 h at room temperature and then 2 M NaOH and Et<sub>2</sub>O were added. The layers were separated and the aqueous layer was extracted with Et<sub>2</sub>O. The combined organic layers were dried over Na<sub>2</sub>SO<sub>4</sub> and then evaporated under reduced pressure. The crude product was purified by flash column chromatography using EtOAc/pentane as an eluent to furnish the corresponding *N*-benzylpropargylamine.

### 2.2 General procedure for synthesis of *N*-Benzyl homopropargylamines (1ba-1bh).<sup>2,3</sup>

Homopropargylamines were synthesized using the literature procedure.<sup>2,3</sup>

To a solution of homo propargyl alcohol (1 equiv.) and triethylamine (1.5 equiv.) in DCM (7 mL/mmol) was added methanesulfonyl chloride (1.2 equiv.) dropwise at 0 °C. The reaction mixture was allowed to stir at 0 °C for 1 hour and then quenched with 1N aqueous HCl. The aqueous layer was extracted with DCM and the organic layers were washed with brine and dried over Na<sub>2</sub>SO<sub>4</sub>. Crude mesylate was dissolved in DMSO (2 mL/mmol). The benzyl amine (2 equiv.) and sodium iodide (0.1 equiv.) were then added and the reaction mixture was stirred at 50 °C for 16 hours. The solution was then cooled to room temperature and diluted with saturated aqueous NaHCO<sub>3</sub> and ethyl acetate. The phases were separated and the aqueous layer extracted with ethyl acetate. The organic layer was dried over Na<sub>2</sub>SO<sub>4</sub> and then evaporated under reduced pressure. The crude product was purified by flash column chromatography using EtOAc/pentane as an eluent to furnish the corresponding *N*-benzyl homopropargylamine.

### 2.3 General procedure A for carboxylative sulfonylation

The reaction tube was charged with propargylamine (0.14 mmol), sodium arylsulfinate (0.21 mmol), Cs<sub>2</sub>CO<sub>3</sub> (0.28 mmol) and Ru(bpy)<sub>3</sub>Cl<sub>2</sub>·6H<sub>2</sub>O (2 mol%) in DMSO (2 mL). The mixture was stirred under blue LED irradiation for 14 hours. Then, the reaction mixture was quenched with H<sub>2</sub>O (20 mL) and aqueous layer was extracted with ethyl acetate (2x10 mL). The combined organic layer was dried over Na<sub>2</sub>SO<sub>4</sub> and then evaporated under reduced pressure. The crude product was purified by flash column chromatography using EtOAc/pentane as an eluent to furnish the corresponding final product.

Note: the lights heat the reaction slightly. The reaction temperature was measured to be 27 °C. A control experiment carried out at 27 °C without light gave no reaction.

## 2.4 Scale-up reaction

A 50 mL round bottom flask was charged with *N*-benzylprop-2-yn-1-amine (1.40 mmol), Sodium benzenesulfinate (2.10 mmol), Cs<sub>2</sub>CO<sub>3</sub> (2.80 mmol) and Ru(bpy)<sub>3</sub>Cl<sub>2</sub>·6H<sub>2</sub>O (2 mol%) in DMSO (15 mL). The mixture was stirred under blue LED irradiation for 24 hours. Then, the reaction mixture was quenched with H<sub>2</sub>O (75 mL) and aqueous layer was extracted with ethyl acetate (2x20 mL). The combined organic layer was dried over Na<sub>2</sub>SO<sub>4</sub> and then evaporated under reduced pressure. The crude product was purified by flash column chromatography using EtOAc/pentane 2:3 as an eluent to furnish the 3-benzyl-5-(tosylmethyl)oxazol-2(3*H*)-one as a white solid (346 mg, 73%).

### 3-Benzyl-5-(tosylmethyl)oxazol-2(3*H*)-one (3a)

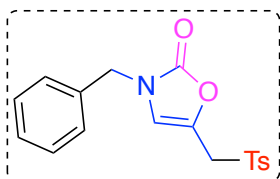

**3a** (40 mg) was synthesized following general procedure A; white solid; 84% yield (eluent: EtOAc/Pentane = 2:3); <sup>1</sup>H NMR (400 MHz, CDCl<sub>3</sub>): δ 7.64 (d, *J* = 8.3 Hz, 2H), 7.42-7.32 (m, 3H), 7.27 (d, *J* = 8.1 Hz, 2H), 7.26-7.20 (m, 2H), 6.43 (s, 1H), 4.66 (s, 2H), 4.13-4.08 (m, 2H), 2.42 (s, 3H); <sup>13</sup>C NMR (101 MHz, CDCl<sub>3</sub>): δ 154.6, 145.5, 134.9, 134.8, 130.0, 129.1, 128.6, 128.6, 128.4, 128.0, 116.1, 54.0, 47.8, 21.7; HRMS: [M+H]<sup>+</sup> calculated for C<sub>18</sub>H<sub>18</sub>NO<sub>4</sub>S: 344.0956; found: 344.0951.

### 3-(1-Phenylethyl)-5-(tosylmethyl)oxazol-2(3*H*)-one (3b)

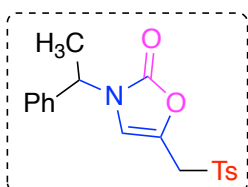

**3b** (33 mg) was synthesized following general procedure A; white solid; 68% yield (eluent: EtOAc/Pentane = 2:3); <sup>1</sup>H NMR (500 MHz, CDCl<sub>3</sub>): δ 7.64 (d, *J* = 8.3 Hz, 2H), 7.41-7.33 (m, 3H), 7.29-7.26 (m, 4H), 6.46 (s, 1H), 5.26 (q, *J* = 7.1 Hz, 1H), 4.11 (s, 2H), 2.44 (s, 3H), 1.67 (d, *J* = 7.1 Hz, 3H); <sup>13</sup>C NMR (126 MHz, CDCl<sub>3</sub>): δ 154.1, 145.5, 139.3, 134.7, 129.9, 129.0, 128.5, 128.5, 128.4, 126.5, 113.9, 54.1, 52.8, 21.7, 19.2; HRMS: [M+H]<sup>+</sup> calculated for C<sub>19</sub>H<sub>20</sub>NO<sub>4</sub>S: 358.1113; found: 358.1108.

### 3-(1-Phenylpropyl)-5-(tosylmethyl)oxazol-2(3H)-one (3c)

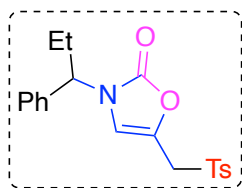

**3c** (34 mg) was synthesized following general procedure A; white solid; 65% yield (eluent: EtOAc/Pentane = 2:3);  $^1\text{H}$  NMR (400 MHz,  $\text{CDCl}_3$ ):  $\delta$  7.60 (d,  $J = 8.3$  Hz, 2H), 7.38-7.31 (m, 3H), 7.27-7.23 (m, 4H), 6.52 (s, 1H), 4.93 (dd,  $J = 9.0, 6.8$  Hz, 1H), 4.11 (s, 2H), 2.41 (s, 3H), 2.12-1.97 (m, 2H), 0.94 (t,  $J = 7.3$  Hz, 3H);  $^{13}\text{C}$  NMR (101 MHz,  $\text{CDCl}_3$ ):  $\delta$  154.4, 145.5, 138.6, 134.6, 129.9, 129.0, 128.6, 128.5, 128.4, 126.9, 113.8, 59.2, 54.1, 26.4, 21.7, 10.9; HRMS:  $[\text{M}+\text{H}]^+$  calculated for  $\text{C}_{20}\text{H}_{22}\text{NO}_4\text{S}$ : 372.1269; found: 372.1265.

### 3-Phenethyl-5-(tosylmethyl)oxazol-2(3H)-one (3d)

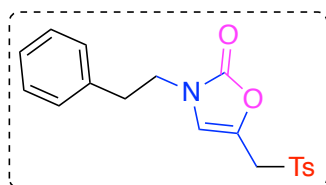

**3d** (40 mg) was synthesized following general procedure A; white solid; 82% yield (eluent: EtOAc/Pentane = 2:3);  $^1\text{H}$  NMR (400 MHz,  $\text{CDCl}_3$ ):  $^1\text{H}$  NMR (500 MHz,  $\text{CDCl}_3$ ):  $\delta$  7.66 (d,  $J = 7.9$  Hz, 2H), 7.33-7.28 (m, 4H), 7.26-7.24 (m, 1H), 7.17 (d,  $J = 7.4$  Hz, 2H), 6.35 (s, 1H), 4.08 (s, 2H), 3.80 (t,  $J = 7.1$  Hz, 2H), 2.96 (t,  $J = 7.1$  Hz, 2H), 2.45 (s, 3H);  $^{13}\text{C}$  NMR (126 MHz,  $\text{CDCl}_3$ ):  $\delta$  154.4, 145.6, 137.1, 135.1, 130.0, 128.9, 128.7, 128.4, 128.0, 127.1, 116.8, 53.9, 45.5, 35.0, 21.7; HRMS:  $[\text{M}+\text{H}]^+$  calculated for  $\text{C}_{19}\text{H}_{20}\text{NO}_4\text{S}$ : 358.1113; found: 358.1110.

### 3-(2-Methoxybenzyl)-5-(tosylmethyl)oxazol-2(3H)-one (3e)

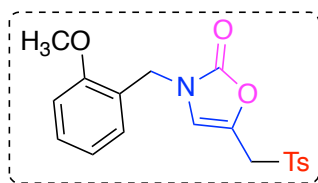

**3e** (42 mg) was synthesized following general procedure A; white solid; 79% yield (eluent: EtOAc/Pentane = 2:3);  $^1\text{H}$  NMR (400 MHz,  $\text{CDCl}_3$ ):  $\delta$  7.62 (d,  $J = 8.3$  Hz, 2H), 7.32 (td,  $J = 7.9, 1.8$  Hz, 1H), 7.23 (app td,  $J = 7.9, 3.3$  Hz, 3H), 6.98-6.87 (m, 2H), 6.56 (s, 1H), 4.66 (s, 2H), 4.08 (s, 2H), 3.85 (s, 3H), 2.40 (s, 3H);  $^{13}\text{C}$  NMR (101 MHz,  $\text{CDCl}_3$ ):  $\delta$  157.3, 154.6, 145.4, 134.9, 130.5, 130.1, 129.9, 128.4, 127.8, 123.2, 120.9, 117.1, 110.7, 55.4, 54.1, 43.2, 21.7; HRMS:  $[\text{M}+\text{H}]^+$  calculated for  $\text{C}_{19}\text{H}_{20}\text{NO}_5\text{S}$ : 374.1062; found: 374.1059.

### 3-(3-Methoxybenzyl)-5-(tosylmethyl)oxazol-2(3H)-one (3f)

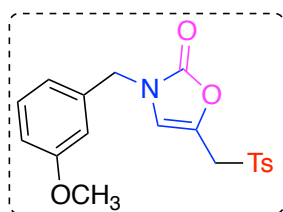

**3f** (35 mg) was synthesized following general procedure A; white solid; 66% yield (eluent: EtOAc/Pentane = 2:3);  $^1\text{H}$  NMR (500 MHz,  $\text{CDCl}_3$ )  $\delta$  7.66 (d,  $J$  = 8.3 Hz, 2H), 7.35-7.28 (m, 3H), 6.89 (ddd,  $J$  = 8.3, 2.6, 0.9 Hz, 1H), 6.81 (ddd,  $J$  = 7.6, 1.6, 0.9 Hz, 1H), 6.77 (t,  $J$  = 2.1 Hz, 1H), 6.45 (s, 1H), 4.65 (s, 2H), 4.11 (d,  $J$  = 0.9 Hz, 2H), 3.81 (s, 3H), 2.44 (s, 3H);  $^{13}\text{C}$  NMR (126 MHz,  $\text{CDCl}_3$ ):  $\delta$  160.2, 154.6, 145.6, 136.4, 134.8, 130.2, 130.0, 128.6, 128.4, 120.1, 116.1, 113.9, 113.7, 55.3, 54.0, 47.8, 21.7; HRMS:  $[\text{M}+\text{H}]^+$  calculated for  $\text{C}_{19}\text{H}_{20}\text{NO}_5\text{S}$ : 374.1062; found: 374.1059.

### 3-(3-Chloro-4-methoxybenzyl)-5-(tosylmethyl)oxazol-2(3H)-one (3g)

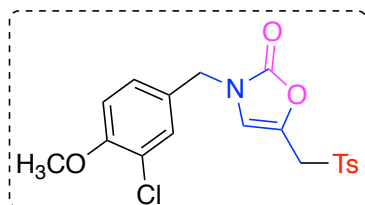

**3g** (39 mg) was synthesized following general procedure A; white solid; 69% yield (eluent: EtOAc/Pentane = 2:3);  $^1\text{H}$  NMR (500 MHz,  $\text{CDCl}_3$ ):  $\delta$  7.66 (d,  $J$  = 8.0 Hz, 2H), 7.32 (app d,  $J$  = 8.1 Hz, 3H), 7.14 (dd,  $J$  = 8.4, 2.2 Hz, 1H), 6.92 (d,  $J$  = 8.4 Hz, 1H), 6.46 (s, 1H), 4.59 (s, 2H), 4.12 (s, 2H), 3.91 (s, 3H), 2.44 (s, 3H);  $^{13}\text{C}$  NMR (101 MHz,  $\text{CDCl}_3$ ):  $\delta$  155.2, 154.4, 145.6, 134.8, 130.0, 129.8, 128.7, 128.4, 128.0, 127.7, 123.1, 115.9, 112.3, 56.2, 53.9, 46.9, 21.7; HRMS:  $[\text{M}+\text{H}]^+$  calculated for  $\text{C}_{19}\text{H}_{19}\text{ClNO}_5\text{S}$ : 408.0672 and 410.0643; found: 408.0668 and 410.0636.

### 3-(2-Chlorobenzyl)-5-(tosylmethyl)oxazol-2(3H)-one (3h)

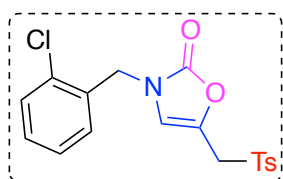

**3h** (38 mg) was synthesized following general procedure A; white solid; 71% yield (eluent: EtOAc/Pentane = 2:3);  $^1\text{H}$  NMR (400 MHz,  $\text{CDCl}_3$ ):  $\delta$  7.66 (d,  $J$  = 8.3 Hz, 2H), 7.44-7.39 (m, 1H), 7.33-7.26 (m, 5H), 6.54-6.49 (m, 1H), 4.79 (s, 2H), 4.10 (d,  $J$  = 1.0 Hz, 2H), 2.42 (s, 3H);  $^{13}\text{C}$  NMR (126 MHz,  $\text{CDCl}_3$ ):  $\delta$  154.4, 145.6, 134.8, 133.6, 132.5, 130.7, 130.2, 130.0, 128.6, 128.4, 127.5, 116.4, 116.4, 54.0, 45.5, 21.7; HRMS:  $[\text{M}+\text{H}]^+$  calculated for  $\text{C}_{18}\text{H}_{17}\text{ClNO}_4\text{S}$ : 378.0566 and 380.0537; Found: 378.0562 and 380.0530.

### 3-(4-Chlorobenzyl)-5-(tosylmethyl)oxazol-2(3H)-one (3i)

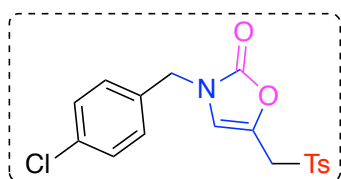

**3i** (37 mg) was synthesized following general procedure A; white solid; 70% yield (eluent: EtOAc/Pentane = 2:3);  $^1\text{H}$  NMR (500 MHz,  $\text{CDCl}_3$ ):  $\delta$  7.66 (d,  $J$  = 8.3 Hz, 2H), 7.35 (d,  $J$  = 8.4 Hz, 2H), 7.30 (d,  $J$  = 8.0 Hz, 2H), 7.18 (d,  $J$  = 8.5 Hz, 2H), 6.45 (s, 1H), 4.65 (s, 2H), 4.12 (d,  $J$  = 1.0 Hz, 2H), 2.45 (s, 3H);  $^{13}\text{C}$  NMR (126 MHz,  $\text{CDCl}_3$ ):  $\delta$  154.5, 145.6, 134.8, 134.6, 133.5, 130.0, 129.4, 129.3, 128.8, 128.4, 115.9, 53.9, 47.2, 21.7; HRMS:  $[\text{M}+\text{Na}]^+$  calculated for  $\text{C}_{18}\text{H}_{16}\text{ClNO}_4\text{SNa}$ : 400.0386 and 402.0356; found: 400.0380 and 402.0350.

### 3-(3-Bromobenzyl)-5-(tosylmethyl)oxazol-2(3H)-one (3j)

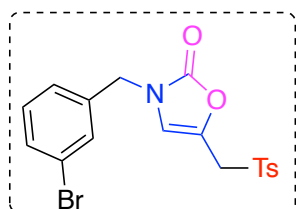

**3j** (42 mg) was synthesized following general procedure A; white solid; 72% yield (eluent: EtOAc/Pentane = 2:3);  $^1\text{H}$  NMR (400 MHz,  $\text{CDCl}_3$ ):  $\delta$  7.65 (d,  $J$  = 8.3 Hz, 2H), 7.48 (ddd,  $J$  = 7.9, 1.9, 1.1 Hz, 1H), 7.37 (s, 1H), 7.33-7.28 (m, 2H), 7.25-7.21 (m, 1H), 7.19-7.14 (m, 1H), 6.46 (t,  $J$  = 0.9 Hz, 1H), 4.63 (s, 2H), 4.11 (s, 2H), 2.43 (s, 3H);  $^{13}\text{C}$  NMR (101 MHz,  $\text{CDCl}_3$ ):  $\delta$  154.5, 145.7, 137.2, 134.8, 131.7, 130.8, 130.7, 130.0, 128.9, 128.4, 126.5, 123.1, 115.9, 53.9, 47.2, 21.7; HRMS:  $[\text{M}+\text{H}]^+$  calculated for  $\text{C}_{18}\text{H}_{17}\text{BrNO}_4\text{S}$ : 422.0061 and 424.0037; found: 422.0058 and 424.0038.

### 3-(4-Bromobenzyl)-5-(tosylmethyl)oxazol-2(3H)-one (3k)

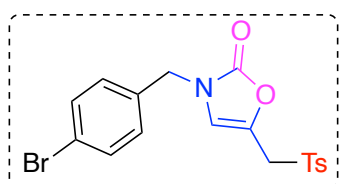

**3k** (44 mg) was synthesized following general procedure A; white solid; 75% yield (eluent: EtOAc/Pentane = 2:3);  $^1\text{H}$  NMR (400 MHz,  $\text{CDCl}_3$ ):  $\delta$  7.64 (d,  $J$  = 8.3 Hz, 2H), 7.49 (d,  $J$  = 8.4 Hz, 2H), 7.28 (dt,  $J$  = 7.9, 0.7 Hz, 2H), 7.10 (d,  $J$  = 8.4 Hz, 2H), 6.43 (s, 1H), 4.61 (s, 2H), 4.10 (d,  $J$  = 1.0 Hz, 2H), 2.43 (s, 3H);  $^{13}\text{C}$  NMR (101 MHz,  $\text{CDCl}_3$ ):  $\delta$  154.5, 145.6, 134.8, 134.0, 132.3, 130.0, 129.6, 128.8, 128.4, 122.7, 115.9, 53.9, 47.2, 21.7;  $[\text{M}+\text{H}]^+$  calculated for  $\text{C}_{18}\text{H}_{17}\text{BrNO}_4\text{S}$ : 422.0061 and 424.0037; found: 422.0056 and 424.0036.

### 4-((2-Oxo-5-(tosylmethyl)oxazol-3(2H)-yl)methyl)benzonitrile (**3l**)

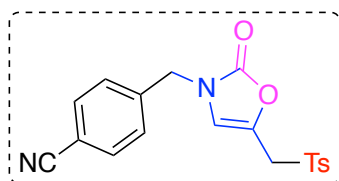

**3l** (34 mg) was synthesized following general procedure A; white solid; 65% yield (eluent: EtOAc/Pentane = 2:3);  $^1\text{H}$  NMR (400 MHz,  $\text{CDCl}_3$ )  $\delta$  7.67 (app t,  $J = 8.3$  Hz, 4H), 7.33 (app dd,  $J = 8.1$  Hz, 4H), 6.53 (s, 1H), 4.74 (s, 2H), 4.12 (d,  $J = 1.0$  Hz, 2H), 2.44 (s, 3H);  $^{13}\text{C}$  NMR (101 MHz,  $\text{CDCl}_3$ ):  $\delta$  154.5, 145.7, 140.2, 135.0, 132.9, 130.1, 129.1, 128.4, 128.3, 118.1, 116.0, 112.6, 53.8, 47.3, 21.7; HRMS:  $[\text{M}+\text{H}]^+$  calculated for  $\text{C}_{19}\text{H}_{17}\text{N}_2\text{O}_4\text{S}$ : 369.0909; found: 369.0903.

### Methyl 4-((2-oxo-5-(tosylmethyl)oxazol-3(2H)-yl)methyl)benzoate (**3m**)

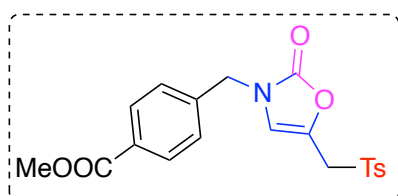

**3m** (34 mg) was synthesized following general procedure A; white solid; 61% yield (eluent: EtOAc/Pentane = 1:1);  $^1\text{H}$  NMR (400 MHz,  $\text{CDCl}_3$ ):  $\delta$  8.03 (d,  $J = 8.3$  Hz, 2H), 7.65 (d,  $J = 8.3$  Hz, 2H), 7.34-7.25 (m, 4H), 6.45 (s, 1H), 4.72 (s, 2H), 4.11 (d,  $J = 1.0$  Hz, 2H), 3.91 (s, 3H), 2.43 (s, 3H);  $^{13}\text{C}$  NMR (101 MHz,  $\text{CDCl}_3$ ):  $\delta$  166.4, 154.5, 145.6, 139.8, 134.8, 130.4, 130.3, 130.0, 128.9, 128.4, 127.7, 116.0, 53.9, 52.3, 47.5, 21.7; HRMS:  $[\text{M}+\text{H}]^+$  calculated for  $\text{C}_{20}\text{H}_{20}\text{NO}_6\text{S}$ : 402.1011; found: 402.1004.

### 5-(Tosylmethyl)-3-(3-(trifluoromethyl)benzyl)oxazol-2(3H)-one (**3n**)

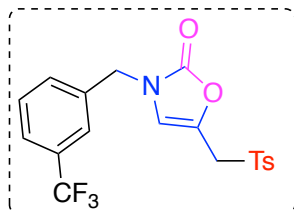

**3n** (37 mg) was synthesized following general procedure A; white solid; 65% yield (eluent: EtOAc/Pentane = 3:7);  $^1\text{H}$  NMR (400 MHz,  $\text{CDCl}_3$ ):  $\delta$  7.68-7.64 (m, 2H), 7.62 (d,  $J = 7.7$  Hz, 1H), 7.54-7.42 (m, 3H), 7.32-7.27 (m, 2H), 6.49 (s, 1H), 4.73 (s, 2H), 4.12 (d,  $J = 1.0$  Hz, 2H);  $^{13}\text{C}$  NMR (101 MHz,  $\text{CDCl}_3$ ):  $\delta$  154.5, 145.7, 136.0, 134.8, 131.6 (app d,  $J = 32.5$  Hz), 131.2, 130.0, 129.7, 129.0, 128.4, 125.5 (q,  $J = 3.7$  Hz), 124.5 (q,  $J = 3.7$  Hz), 123.1 (app d,  $J = 272.9$  Hz), 115.9, 53.9, 47.4, 21.7; HRMS:  $[\text{M}+\text{H}]^+$  calculated for  $\text{C}_{19}\text{H}_{17}\text{F}_3\text{NO}_4\text{S}$ : 412.0830; found: 412.0826.



### 3-(Furan-2-ylmethyl)-5-(tosylmethyl)oxazol-2(3H)-one (3o)

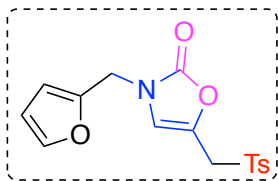

**3o** (38 mg) was synthesized following general procedure A; white solid; 82% yield (eluent: EtOAc/Pentane = 3:7);  $^1\text{H}$  NMR (400 MHz,  $\text{CDCl}_3$ ):  $\delta$  7.66 (d,  $J$  = 8.3 Hz, 2H), 7.40 (dd,  $J$  = 1.8, 0.9 Hz, 1H), 7.33-7.28 (m, 2H), 6.59 (t,  $J$  = 1.0 Hz, 1H), 6.36-6.33 (m, 2H), 4.66 (s, 2H), 4.10 (d,  $J$  = 1.0 Hz, 2H), 2.43 (s, 3H);  $^{13}\text{C}$  NMR (101 MHz,  $\text{CDCl}_3$ ):  $\delta$  154.1, 147.8, 145.6, 143.4, 134.9, 130.0, 128.6, 128.4, 116.1, 110.7, 109.7, 54.0, 40.4, 21.7; HRMS:  $[\text{M}+\text{H}]^+$  calculated for  $\text{C}_{16}\text{H}_{16}\text{NO}_5\text{S}$ : 334.0749; found: 334.0746.

### 3-Propyl-5-(tosylmethyl)oxazol-2(3H)-one (3p)

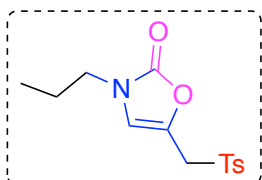

**3p** (25 mg) was synthesized following general procedure A; white solid; 62% yield (eluent: EtOAc/Pentane = 2:3);  $^1\text{H}$  NMR (400 MHz,  $\text{CDCl}_3$ ):  $\delta$  7.70 (d,  $J$  = 8.3 Hz, 2H), 7.39-7.30 (m, 2H), 6.56 (d,  $J$  = 0.9 Hz, 1H), 4.14 (d,  $J$  = 1.0 Hz, 2H), 3.47 (t, 7.24 Hz, 2H), 2.43 (s, 3H), 1.68-1.59 (m, 2H), 0.91 (t,  $J$  = 7.4 Hz, 3H);  $^{13}\text{C}$  NMR (101 MHz,  $\text{CDCl}_3$ ):  $\delta$  154.6, 145.6, 135.0, 130.0, 128.4, 128.2, 116.5, 77.3, 77.0, 76.7, 54.0, 45.7, 22.1, 21.7, 10.9; HRMS:  $[\text{M}+\text{H}]^+$  calculated for  $\text{C}_{14}\text{H}_{18}\text{NO}_4\text{S}$ : 296.0956; found: 296.0953.

### 3-Cyclohexyl-5-(tosylmethyl)oxazol-2(3H)-one (3q)

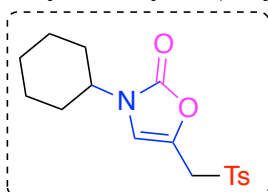

**3q** (33 mg) was synthesized following general procedure A; white solid; 70% yield (eluent: EtOAc/Pentane = 2:3);  $^1\text{H}$  NMR (500 MHz,  $\text{CDCl}_3$ ):  $\delta$  7.73-7.67 (m, 2H), 7.34 (d,  $J$  = 8.0 Hz, 2H), 6.61 (s, 1H), 4.14 (s, 2H), 3.79 (tt,  $J$  = 7.8, 4.0 Hz, 1H), 2.45 (s, 3H), 1.94-1.93 (m, 2H), 1.90-1.82 (m, 2H), 1.73-1.70 (m, 1H), 1.37 (qd,  $J$  = 12.1, 6.2 Hz, 4H), 1.22-1.09 (m, 1H);  $^{13}\text{C}$  NMR (126 MHz,  $\text{CDCl}_3$ ):  $\delta$  154.1, 145.6, 135.0, 130.0, 128.4, 128.3, 113.8, 54.1, 53.4, 32.1, 25.2, 25.0, 21.7; HRMS:  $[\text{M}+\text{H}]^+$  calculated for  $\text{C}_{17}\text{H}_{22}\text{NO}_4\text{S}$ : 336.1269; Found: 336.1267.

### 3-Benzyl-4-methyl-5-(tosylmethyl)oxazol-2(3H)-one (**3u**)

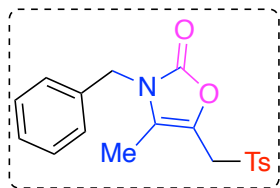

**3u** (28 mg) was synthesized following general procedure A; white solid; 57% yield (eluent: EtOAc/Pentane = 2:3);  $^1\text{H}$  NMR (400 MHz,  $\text{CDCl}_3$ ):  $\delta$  7.62 (d,  $J$  = 8.3 Hz, 2H), 7.38-7.30 (m, 3H), 7.27-7.23 (m, 2H), 7.22-7.17 (m, 2H), 4.70 (s, 2H), 4.11 (s, 2H), 2.40 (s, 3H), 1.77 (s, 3H);  $^{13}\text{C}$  NMR (101 MHz,  $\text{CDCl}_3$ ):  $\delta$  154.9, 145.4, 135.7, 134.8, 130.0, 129.0, 128.4, 128.2, 127.1, 125.4, 123.8, 53.2, 45.5, 21.7, 8.3; HRMS:  $[\text{M}+\text{H}]^+$  calculated for  $\text{C}_{19}\text{H}_{20}\text{NO}_4\text{S}$ : 358.1113; found: 358.1110.

### 3-Benzyl-6-(tosylmethyl)-3,4-dihydro-2H-1,3-oxazin-2-one (**4a**)

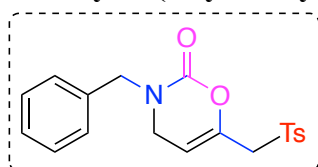

**4a** (26 mg) was synthesized following general procedure A; white solid; 52% yield (eluent: EtOAc/Pentane = 1:1);  $^1\text{H}$  NMR (400 MHz,  $\text{CDCl}_3$ ):  $\delta$  7.81-7.72 (m, 2H), 7.37-7.30 (m, 5H), 7.27-7.23 (m, 2H), 5.23 (t,  $J$  = 3.4 Hz, 1H), 4.49 (s, 2H), 3.84 (s, 2H), 3.73 (d,  $J$  = 3.4 Hz, 2H), 2.43 (s, 3H);  $^{13}\text{C}$  NMR (101 MHz,  $\text{CDCl}_3$ ):  $\delta$  149.4, 145.4, 140.6, 135.5, 135.1, 129.9, 128.8, 128.4, 128.2, 128.1, 102.6, 59.4, 52.1, 44.7, 21.7; HRMS:  $[\text{M}+\text{H}]^+$  calculated for  $\text{C}_{24}\text{H}_{22}\text{NO}_4\text{S}$ : 358.1113; found: 358.1108.

### 3-(4-Methylbenzyl)-6-(tosylmethyl)-3,4-dihydro-2H-1,3-oxazin-2-one (**4b**)

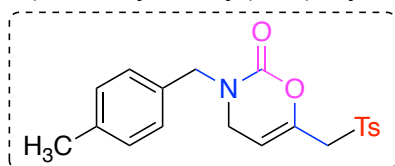

**4b** (26 mg) was synthesized following general procedure A; white solid; 50% yield (eluent: EtOAc/Pentane = 1:1);  $^1\text{H}$  NMR (400 MHz,  $\text{CDCl}_3$ ):  $\delta$  7.76 (d,  $J$  = 8.3 Hz, 2H), 7.33 (d,  $J$  = 7.8 Hz, 2H), 7.14 (s, 4H), 5.22 (t,  $J$  = 3.4 Hz, 1H), 4.45 (s, 2H), 3.83 (s, 2H), 3.71 (d,  $J$  = 3.4 Hz, 2H), 2.44 (s, 3H), 2.34 (s, 3H);  $^{13}\text{C}$  NMR (101 MHz,  $\text{CDCl}_3$ ):  $\delta$  149.4, 145.4, 140.5, 137.9, 135.5, 132.0, 129.9, 129.5, 128.4, 128.2, 102.6, 59.4, 51.8, 44.5, 21.7, 21.1; HRMS:  $[\text{M}+\text{H}]^+$  calculated for  $\text{C}_{20}\text{H}_{22}\text{NO}_4\text{S}$ : 372.1269; found: 372.1266.

### 3-(2-Chlorobenzyl)-6-(tosylmethyl)-3,4-dihydro-2H-1,3-oxazin-2-one (4c)

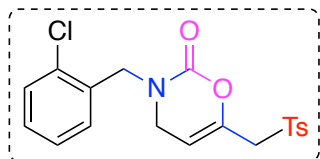

**4c** (24 mg) was synthesized following general procedure A; white solid; 44% yield (eluent: EtOAc/Pentane = 1:1);  $^1\text{H}$  NMR (500 MHz,  $\text{CDCl}_3$ ):  $\delta$  7.80 (d,  $J$  = 8.1 Hz, 2H), 7.41-7.39 (m, 1H), 7.36-7.32 (m, 3H), 7.28 (dd,  $J$  = 6.4, 2.7 Hz, 2H), 5.28 (t,  $J$  = 3.4 Hz, 1H), 4.67 (s, 2H), 3.87 (s, 2H), 3.82 (d,  $J$  = 3.4 Hz, 2H), 2.45 (s, 3H);  $^{13}\text{C}$  NMR (101 MHz,  $\text{CDCl}_3$ ):  $\delta$  149.4, 145.4, 140.7, 135.5, 133.9, 132.6, 129.9, 129.8, 129.5, 129.4, 128.4, 127.3, 102.7, 59.4, 49.3, 45.2, 21.7; HRMS:  $[\text{M}+\text{H}]^+$  calculated for  $\text{C}_{19}\text{H}_{19}\text{ClNO}_4\text{S}$ : 392.0723 and 394.0694; found: 392.0719 and 394.0689.

### 3-(3-Bromobenzyl)-6-(tosylmethyl)-3,4-dihydro-2H-1,3-oxazin-2-one (4d)

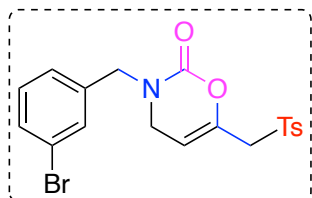

**4d** (27 mg) was synthesized following general procedure A; white solid; 45% yield (eluent: EtOAc/Pentane = 1:1);  $^1\text{H}$  NMR (400 MHz,  $\text{CDCl}_3$ ):  $\delta$  7.77 (d,  $J$  = 8.4 Hz, 2H), 7.45 (dt,  $J$  = 7.5, 1.8 Hz, 1H), 7.41 (d,  $J$  = 1.8 Hz, 1H), 7.37-7.33 (m, 2H), 7.24-7.19 (m, 2H), 5.25 (t,  $J$  = 3.4 Hz, 1H), 4.45 (s, 2H), 3.84 (s, 2H), 3.75 (d,  $J$  = 3.4 Hz, 2H), 2.44 (s, 3H);  $^{13}\text{C}$  NMR (101 MHz,  $\text{CDCl}_3$ ):  $\delta$  149.3, 145.5, 140.7, 137.5, 135.4, 131.3, 131.0, 130.4, 130.0, 128.4, 126.8, 122.9, 102.5, 59.4, 51.6, 44.9, 21.7; HRMS:  $[\text{M}+\text{H}]^+$  calculated for  $\text{C}_{19}\text{H}_{19}\text{BrNO}_4\text{S}$ : 436.0218 and 438.0194; found: 436.0210 and 438.0191.

### Methyl 4-((2-oxo-6-(tosylmethyl)-2H-1,3-oxazin-3(4H)-yl)methyl)benzoate (4e)

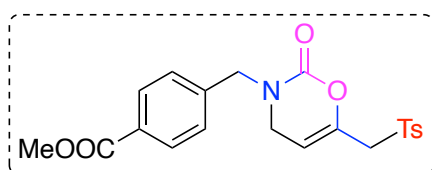

**4e** (28 mg) was synthesized following general procedure A; white solid; 48% yield (eluent: EtOAc/Pentane = 1:1);  $^1\text{H}$  NMR (500 MHz,  $\text{CDCl}_3$ ):  $\delta$  8.02 (s, 2H), 7.79 (d,  $J$  = 8.0 Hz, 2H), 7.36-7.32 (m, 4H), 5.27 (t,  $J$  = 3.4 Hz, 1H), 4.56 (s, 2H), 3.92 (s, 3H), 3.86 (s, 2H), 3.77 (d,  $J$  = 3.4 Hz, 2H), 2.45 (s, 3H);  $^{13}\text{C}$  NMR (101 MHz,  $\text{CDCl}_3$ ):  $\delta$  166.6, 149.4, 145.4, 140.7, 140.2, 135.5, 130.1, 130.0, 129.9, 128.4, 127.9, 102.5, 59.4, 52.2, 51.9, 45.0, 21.7; HRMS:  $[\text{M}+\text{H}]^+$  calculated for  $\text{C}_{21}\text{H}_{22}\text{NO}_6\text{S}$ : 416.1167; found: 416.1161.

### 6-(Tosylmethyl)-3-(3-(trifluoromethyl)benzyl)-3,4-dihydro-2H-1,3-oxazin-2-one (4f)

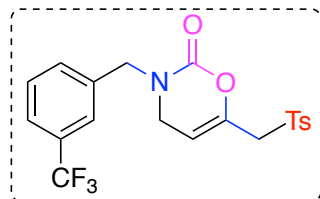

**4f** (23 mg) was synthesized following general procedure A; white solid; 39% yield (eluent: EtOAc/Pentane = 2:3);  $^1\text{H}$  NMR (400 MHz,  $\text{CDCl}_3$ )  $\delta$  7.77 (d,  $J = 8.4$  Hz, 2H), 7.61-7.54 (m, 1H), 7.52-7.44 (m, 3H), 7.33 (d,  $J = 8.1$  Hz, 2H), 5.26 (t,  $J = 3.4$  Hz, 1H), 4.55 (s, 2H), 3.85 (s, 2H), 3.77 (d,  $J = 3.4$  Hz, 2H), 2.43 (s, 3H).  $^{13}\text{C}$  NMR (101 MHz,  $\text{CDCl}_3$ )  $\delta$  149.4, 145.5, 140.7, 136.2, 135.5, 131.5, 131.2 (app d,  $J = 32.3$  Hz), 129.9, 129.4, 128.4, 125.1 (q,  $J = 3.7$  Hz), 124.8 (q,  $J = 3.7$  Hz), 123.8 (app d,  $J = 272.3$  Hz), 102.5, 59.3, 51.8, 45.0, 21.7; HRMS:  $[\text{M}+\text{H}]^+$  calculated for  $\text{C}_{20}\text{H}_{19}\text{F}_3\text{NO}_4\text{S}$ : 426.0986; found: 426.0977.

### 3-Cyclohexyl-6-(tosylmethyl)-3,4-dihydro-2H-1,3-oxazin-2-one (4g)

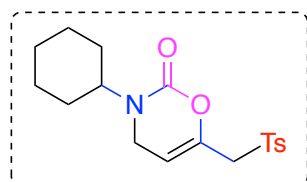

**4g** (25 mg) was synthesized following general procedure A; white solid; 51% yield (eluent: EtOAc/Pentane = 1:1);  $^1\text{H}$  NMR (400 MHz,  $\text{CDCl}_3$ ):  $\delta$  7.77 (d,  $J = 8.4$  Hz, 2H), 7.33 (d,  $J = 8.0$  Hz, 2H), 5.33-5.25 (m, 1H), 4.04 (ddd,  $J = 11.6, 7.8, 3.7$  Hz, 1H), 3.83 (s, 2H), 3.77 (d,  $J = 3.5$  Hz, 2H), 2.43 (s, 3H), 1.85-1.75 (m, 2H), 1.69-1.64 (m, 2H), 1.43-1.32 (m, 4H), 1.12-0.99 (m, 1H), 0.86-0.83 (m, 1H);  $^{13}\text{C}$  NMR (101 MHz,  $\text{CDCl}_3$ ):  $\delta$  148.8, 145.3, 140.2, 135.5, 129.9, 128.4, 102.7, 59.3, 55.6, 39.8, 28.9, 25.5, 25.3, 21.7; HRMS:  $[\text{M}+\text{H}]^+$  calculated for  $\text{C}_{18}\text{H}_{24}\text{NO}_4\text{S}$ : 350.1426; found: 350.1421.

### 3-Benzyl-4-methyl-6-(tosylmethyl)-3,4-dihydro-2H-1,3-oxazin-2-one (4h)

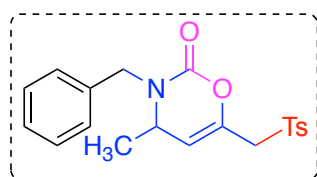

**4h** (18 mg) was synthesized following general procedure A; brown gummy; 36% yield (eluent: EtOAc/Pentane = 2:3);  $^1\text{H}$  NMR (400 MHz,  $\text{CDCl}_3$ ):  $\delta$  7.77 (d,  $J = 8.3$  Hz, 2H), 7.38-7.30 (m, 5H), 7.24 (d,  $J = 7.6$  Hz, 2H), 5.24 (d,  $J = 4.6$  Hz, 1H), 5.05 (d,  $J = 15.2$  Hz, 1H), 4.08 (d,  $J = 15.3$  Hz, 1H), 3.87 (s, 2H), 3.83 (dd,  $J = 6.5, 5.0$  Hz, 1H), 2.45 (s, 3H), 1.23 (d,  $J = 6.4$  Hz, 3H);  $^{13}\text{C}$  NMR (101 MHz,  $\text{CDCl}_3$ ):  $\delta$  149.9, 145.4, 139.8, 135.7, 135.2, 129.9, 128.8, 128.5, 128.0, 127.9, 108.9, 77.3, 77.0, 76.7, 59.3, 49.9, 49.1, 21.7, 20.6; HRMS:  $[\text{M}+\text{H}]^+$  calculated for  $\text{C}_{20}\text{H}_{22}\text{NO}_4\text{S}$ : 372.1269; found: 372.1266.

### 3-Benzyl-6-(((4-chlorophenyl)sulfonyl)methyl)-3,4-dihydro-2H-1,3-oxazin-2-one (4i)

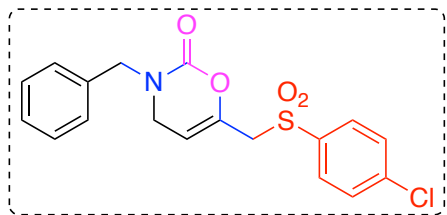

**4i** (18 mg) was synthesized following general procedure A; white solid; 42% yield (eluent: EtOAc/Pentane = 1:1);  $^1\text{H}$  NMR (400 MHz,  $\text{CDCl}_3$ ):  $\delta$  7.83 (d,  $J = 8.7$  Hz, 2H), 7.51 (d,  $J = 8.8$  Hz, 2H), 7.39-7.31 (m, 3H), 7.25 (d,  $J = 6.3$  Hz, 2H), 5.24 (t,  $J = 3.4$  Hz, 1H), 4.49 (s, 2H), 3.86 (s, 2H), 3.74 (d,  $J = 3.4$  Hz, 2H);  $^{13}\text{C}$  NMR (101 MHz,  $\text{CDCl}_3$ ):  $\delta$  149.2, 141.2, 140.3, 136.9, 135.0, 129.9, 129.6, 128.9, 128.2, 128.2, 103.0, 59.5, 52.2, 44.7; HRMS:  $[\text{M}+\text{H}]^+$  calculated for  $\text{C}_{18}\text{H}_{17}\text{ClNO}_4\text{S}$ : 378.0566 and 380.0537; found: 378.0563 and 380.0532.

### 3-Benzyl-6-(((4-fluorophenyl)sulfonyl)methyl)-3,4-dihydro-2H-1,3-oxazin-2-one (4j)

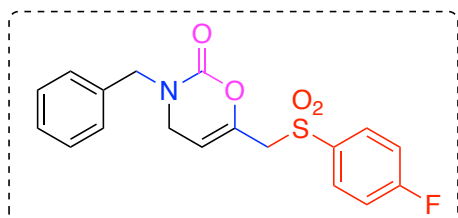

**4j** (15 mg) was synthesized following general procedure A; white solid; 38% yield (eluent: EtOAc/Pentane = 1:1);  $^1\text{H}$  NMR (500 MHz,  $\text{CDCl}_3$ )  $\delta$  7.99-7.87 (m, 2H), 7.41-7.31 (m, 3H), 7.28-7.26 (m, 2H), 7.25-7.19 (m, 2H), 5.26 (t,  $J = 3.4$  Hz, 1H), 4.51 (s, 2H), 3.88 (s, 2H), 3.76 (d,  $J = 3.5$  Hz, 2H);  $^{13}\text{C}$  NMR (126 MHz,  $\text{CDCl}_3$ ):  $\delta$  166.2 (d,  $J = 257.6$  Hz), 149.2, 140.4, 135.0, 134.4, 131.2 (d,  $J = 9.9$  Hz), 128.9, 128.3, 116.8, 116.6, 102.9, 59.6, 52.2, 44.7; HRMS:  $[\text{M}+\text{H}]^+$  calculated for  $\text{C}_{18}\text{H}_{17}\text{FNO}_4\text{S}$ : 362.0862; found: 362.0858.

### 3-Benzyl-6-((phenylsulfonyl)methyl)-3,4-dihydro-2H-1,3-oxazin-2-one (4k):

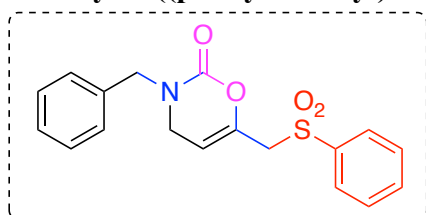

**4j** (18 mg) was synthesized following general procedure A; white solid; 49% yield (eluent: EtOAc/Pentane = 1:1);  $^1\text{H}$  NMR (500 MHz,  $\text{CDCl}_3$ ):  $\delta$  7.95 – 7.88 (m, 2H), 7.72 – 7.65 (m, 1H), 7.60 – 7.53 (m, 2H), 7.38-7.33 (m, 3H), 7.28 – 7.24 (m, 2H), 5.26 (t,  $J = 3.4$  Hz, 1H), 4.50 (s, 2H), 3.88 (s, 2H), 3.75 (d,  $J = 3.5$  Hz, 2H);  $^{13}\text{C}$  NMR (126 MHz,  $\text{CDCl}_3$ ):  $\delta$  149.3, 140.4, 138.4, 135.1, 134.3, 129.3, 128.8, 128.4, 128.2, 128.2, 102.8, 59.4, 52.1, 44.7; HRMS:  $[\text{M}+\text{H}]^+$  calculated for  $\text{C}_{18}\text{H}_{18}\text{NO}_4\text{S}$ : 344.0956; Found: 344.0953.

### 3. Intermediate trapping experiment

#### 3.a HRMS analysis of reaction mixture

General Procedure A was followed except except the reaction was quenched after 5 hours. After completion of the reaction, the reaction mixture was directly analysed by HRMS.

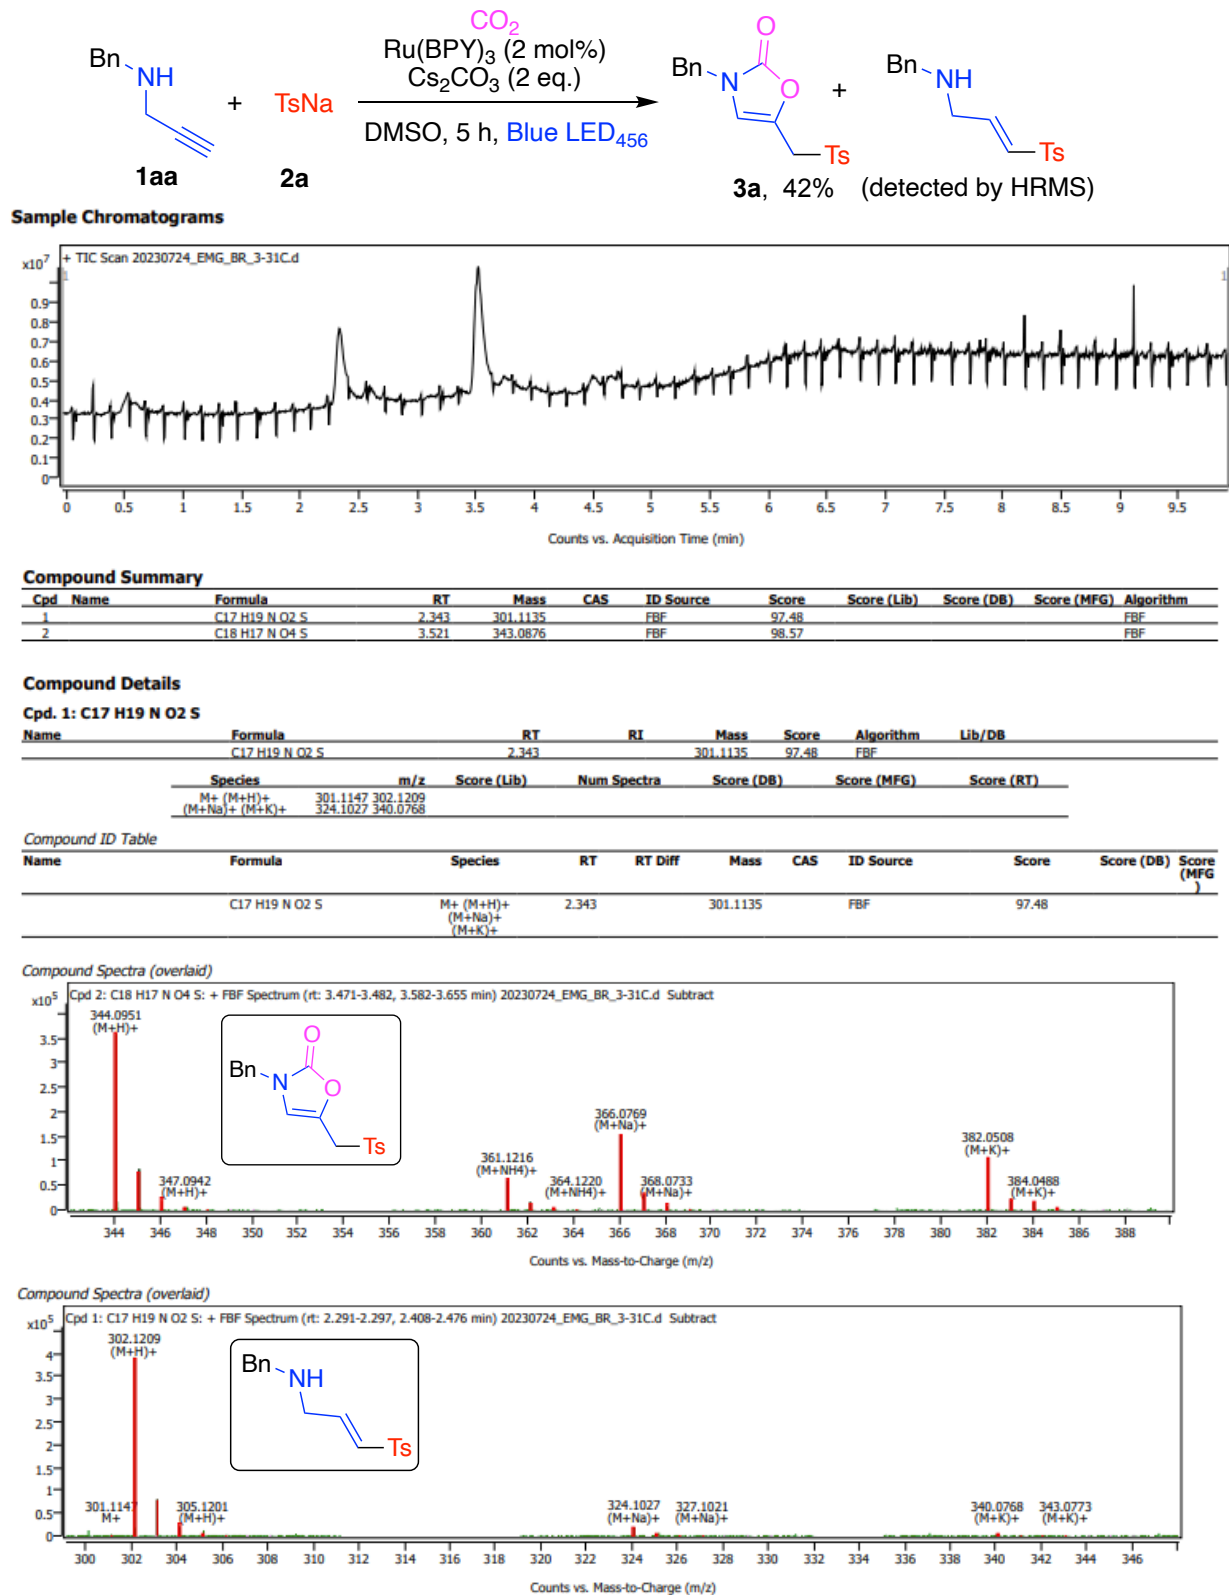

Fig. S2. HRMS spectra.

## 5. X-ray crystallographic studies

### a) X-ray crystallographic studies of compound **3a** (CCDC 2287477)

A single crystals of compound **3a** for X-ray diffraction analysis were grown using  $\text{CHCl}_3$  solvent under slow evaporation method.

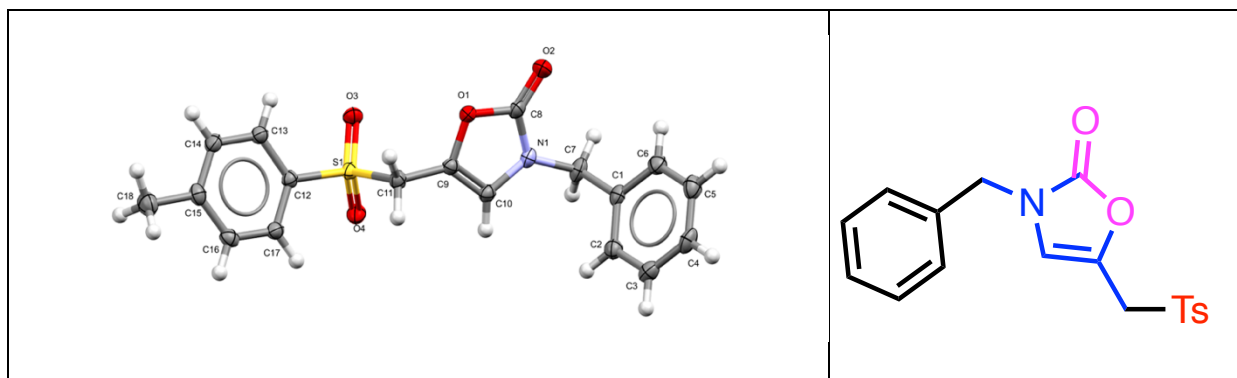

**Fig. S3.** Asymmetric unit, showing the atom-labelling scheme. Displacement ellipsoids are drawn at the 50% probability level.

### Experimental:

Data were obtained at a temperature of 92(6) K in a SuperNova, Dual, Cu at home/near four-circle diffractometer with a microfocus sealed X-ray tube, using a mirror as a monochromator and an Atlas detector and with Cu  $K\alpha$  radiation ( $\lambda = 1.54184 \text{ \AA}$ ).

All data were integrated with CrysAlisPro and a gaussian absorption correction using SCALE3 ABSPACK was applied. All structures was solved by dual methods using SHELXT and refined by full-matrix least-squares methods against  $F^2$  by SHELXL using OLEX2 as an interface.

**Table 1.** Crystal data and structure refinement for **3a**

|                          |                                                   |
|--------------------------|---------------------------------------------------|
| CCDC                     | 2287477                                           |
| Empirical formula        | C <sub>18</sub> H <sub>17</sub> NO <sub>4</sub> S |
| Formula weight           | 343.38                                            |
| Temperature [K]          | 104.4(5)                                          |
| Crystal system           | monoclinic                                        |
| Space group (number)     | $P2_1/c$ (14)                                     |
| a [Å]                    | 12.30520(10)                                      |
| b [Å]                    | 7.33200(10)                                       |
| c [Å]                    | 18.7530(2)                                        |
| $\alpha$ [°]             | 90                                                |
| $\beta$ [°]              | 102.2920(10)                                      |
| $\gamma$ [°]             | 90                                                |
| Volume [Å <sup>3</sup> ] | 1653.14(3)                                        |
| Z                        | 4                                                 |

|                                                           |                                                                  |
|-----------------------------------------------------------|------------------------------------------------------------------|
| <b><math>\rho_{\text{calc}}</math> [gcm<sup>-3</sup>]</b> | 1.380                                                            |
| <b><math>\mu</math> [mm<sup>-1</sup>]</b>                 | 1.933                                                            |
| <b>F(000)</b>                                             | 720                                                              |
| <b>Crystal size [mm<sup>3</sup>]</b>                      | 0.18×0.12×0.05                                                   |
| <b>Crystal colour</b>                                     | translucent intense colourless                                   |
| <b>Crystal shape</b>                                      | block                                                            |
| <b>Radiation</b>                                          | Cu K $\alpha$ ( $\lambda$ =1.54184 Å)                            |
| <b>2<math>\theta</math> range [°]</b>                     | 7.35 to 145.37 (0.81 Å)                                          |
| <b>Index ranges</b>                                       | -15 ≤ h ≤ 15<br>-9 ≤ k ≤ 8<br>-23 ≤ l ≤ 19                       |
| <b>Reflections collected</b>                              | 22109                                                            |
| <b>Independent reflections</b>                            | 3235<br>R <sub>int</sub> = 0.0364<br>R <sub>sigma</sub> = 0.0185 |
| <b>Completeness to <math>\theta</math> = 67.684°</b>      | 99.9 %                                                           |
| <b>Data / Restraints / Parameters</b>                     | 3235/0/218                                                       |
| <b>Goodness-of-fit on F<sup>2</sup></b>                   | 1.040                                                            |
| <b>Final R indexes [I ≥ 2<math>\sigma</math>(I)]</b>      | R1 = 0.0322<br>wR2 = 0.0832                                      |
| <b>Final R indexes [all data]</b>                         | R1 = 0.0377<br>wR2 = 0.0877                                      |
| <b>Largest peak/hole [eÅ<sup>-3</sup>]</b>                | 0.45/-0.48                                                       |

### b) X-ray crystallographic studies of compound 4a (CCDC 2287478)

A single crystals of compound 3a for X-ray diffraction analysis were grown using CHCl<sub>3</sub> solvent under slow evaporation method.

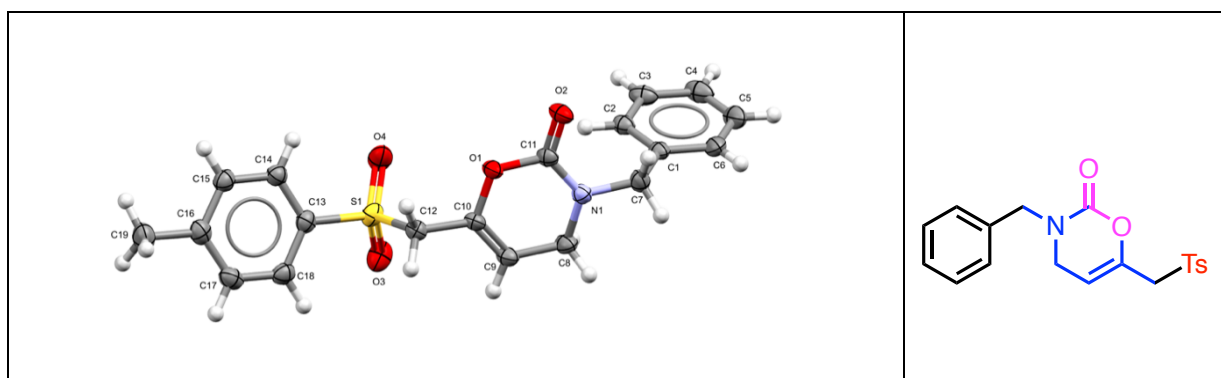

**Fig. S4.** Asymmetric unit, showing the atom-labelling scheme. Displacement ellipsoids are drawn at the 50% probability level.



**Table 2.** Crystal data and structure refinement for **4a**

|                                                               |                                                                    |
|---------------------------------------------------------------|--------------------------------------------------------------------|
| <b>CCDC</b>                                                   | 2287478                                                            |
| <b>Empirical formula</b>                                      | C19H19NO4S                                                         |
| <b>Formula weight</b>                                         | 357.41                                                             |
| <b>Temperature [K]</b>                                        | 104.60(14)                                                         |
| <b>Crystal system</b>                                         | orthorhombic                                                       |
| <b>Space group (number)</b>                                   | $P2_12_12_1$ (19)                                                  |
| <b>a [Å]</b>                                                  | 7.37430(10)                                                        |
| <b>b [Å]</b>                                                  | 15.0097(2)                                                         |
| <b>c [Å]</b>                                                  | 15.6382(2)                                                         |
| <b><math>\alpha</math> [°]</b>                                | 90                                                                 |
| <b><math>\beta</math> [°]</b>                                 | 90                                                                 |
| <b><math>\gamma</math> [°]</b>                                | 90                                                                 |
| <b>Volume [Å<sup>3</sup>]</b>                                 | 1730.93(4)                                                         |
| <b>Z</b>                                                      | 4                                                                  |
| <b><math>\rho_{\text{calc}}</math> [gm<sup>-3</sup>]</b>      | 1.372                                                              |
| <b><math>\mu</math> [mm<sup>-1</sup>]</b>                     | 1.867                                                              |
| <b>F(000)</b>                                                 | 752                                                                |
| <b>Crystal size [mm<sup>3</sup>]</b>                          | 0.34×0.22×0.15                                                     |
| <b>Crystal colour</b>                                         | metallic dark yellow                                               |
| <b>Crystal shape</b>                                          | block                                                              |
| <b>Radiation</b>                                              | Cu K $\alpha$ ( $\lambda=1.54184$ Å)                               |
| <b>2<math>\theta</math> range [°]</b>                         | 8.16 to 145.27 (0.81 Å)                                            |
| <b>Index ranges</b>                                           | $-8 \leq h \leq 6$<br>$-18 \leq k \leq 18$<br>$-18 \leq l \leq 19$ |
| <b>Reflections collected</b>                                  | 16147                                                              |
| <b>Independent reflections</b>                                | 3386<br>R <sub>int</sub> = 0.0314<br>R <sub>sigma</sub> = 0.0213   |
| <b>Completeness to<br/><math>\theta = 67.684^\circ</math></b> | 100.0 %                                                            |

|                                                                        |                             |
|------------------------------------------------------------------------|-----------------------------|
| <b>Data / Restraints / Parameters</b>                                  | 3386/0/227                  |
| <b>Goodness-of-fit on F2</b>                                           | 1.064                       |
| <b>Final R indexes<br/>[I<math>\geq</math>2<math>\sigma</math>(I)]</b> | R1 = 0.0270<br>wR2 = 0.0682 |
| <b>Final R indexes<br/>[all data]</b>                                  | R1 = 0.0293<br>wR2 = 0.0703 |
| <b>Largest peak/hole [e<math>\text{\AA}</math><sup>-3</sup>]</b>       | 0.22/-0.26                  |
| <b>Flack X parameter</b>                                               | -0.004(7)                   |

## 5. References:

1. Q.-W. Song and L.-N. He, *Adv. Synth. Catal.*, 2016, **358**, 1251–1258.
2. W. Hess and J. W. Burton, *Chem.-Eur., J.* 2010, **16**, 12303– 12306.
3. P. Quinodoz, A. Quelhas, K. Wright, B. Drouillat, J. Marrot and F. Couty, *Eur. J. Org. Chem.*, 2017, **2017**, 2621– 2626.

6. Copies of  $^1\text{H}$  and  $^{13}\text{C}$  NMR spectra:

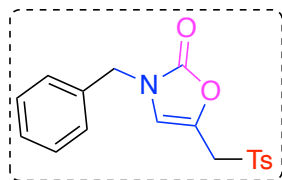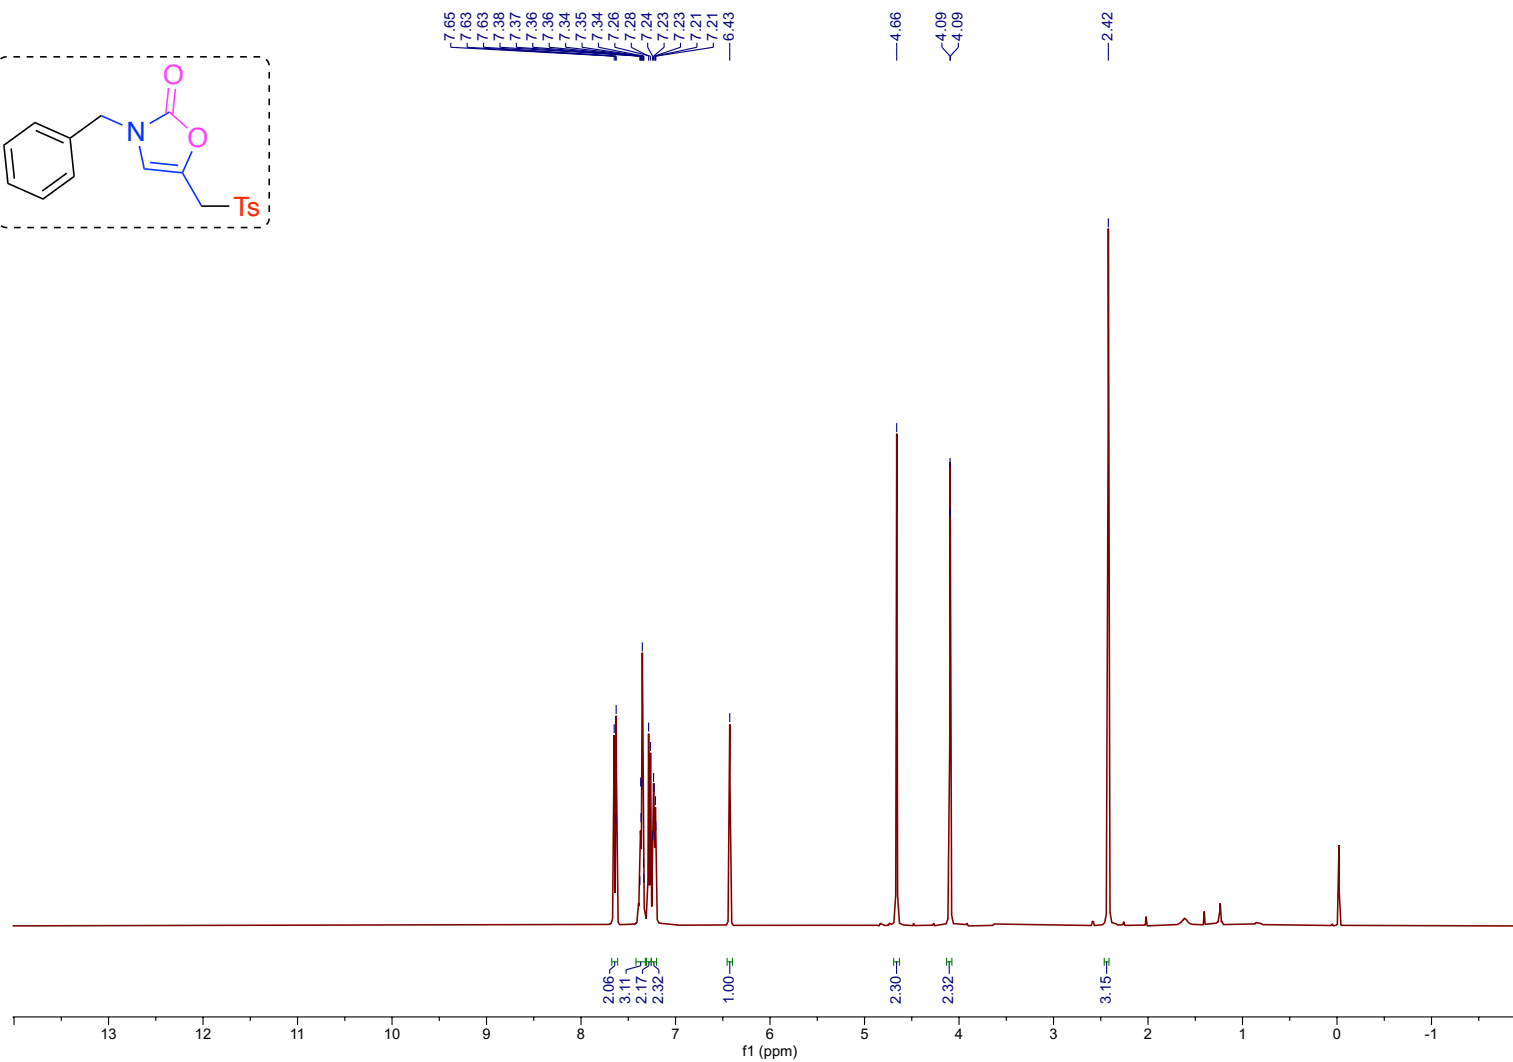

$^1\text{H}$  (400 MHz) spectrum of compound 3a in  $\text{CDCl}_3$

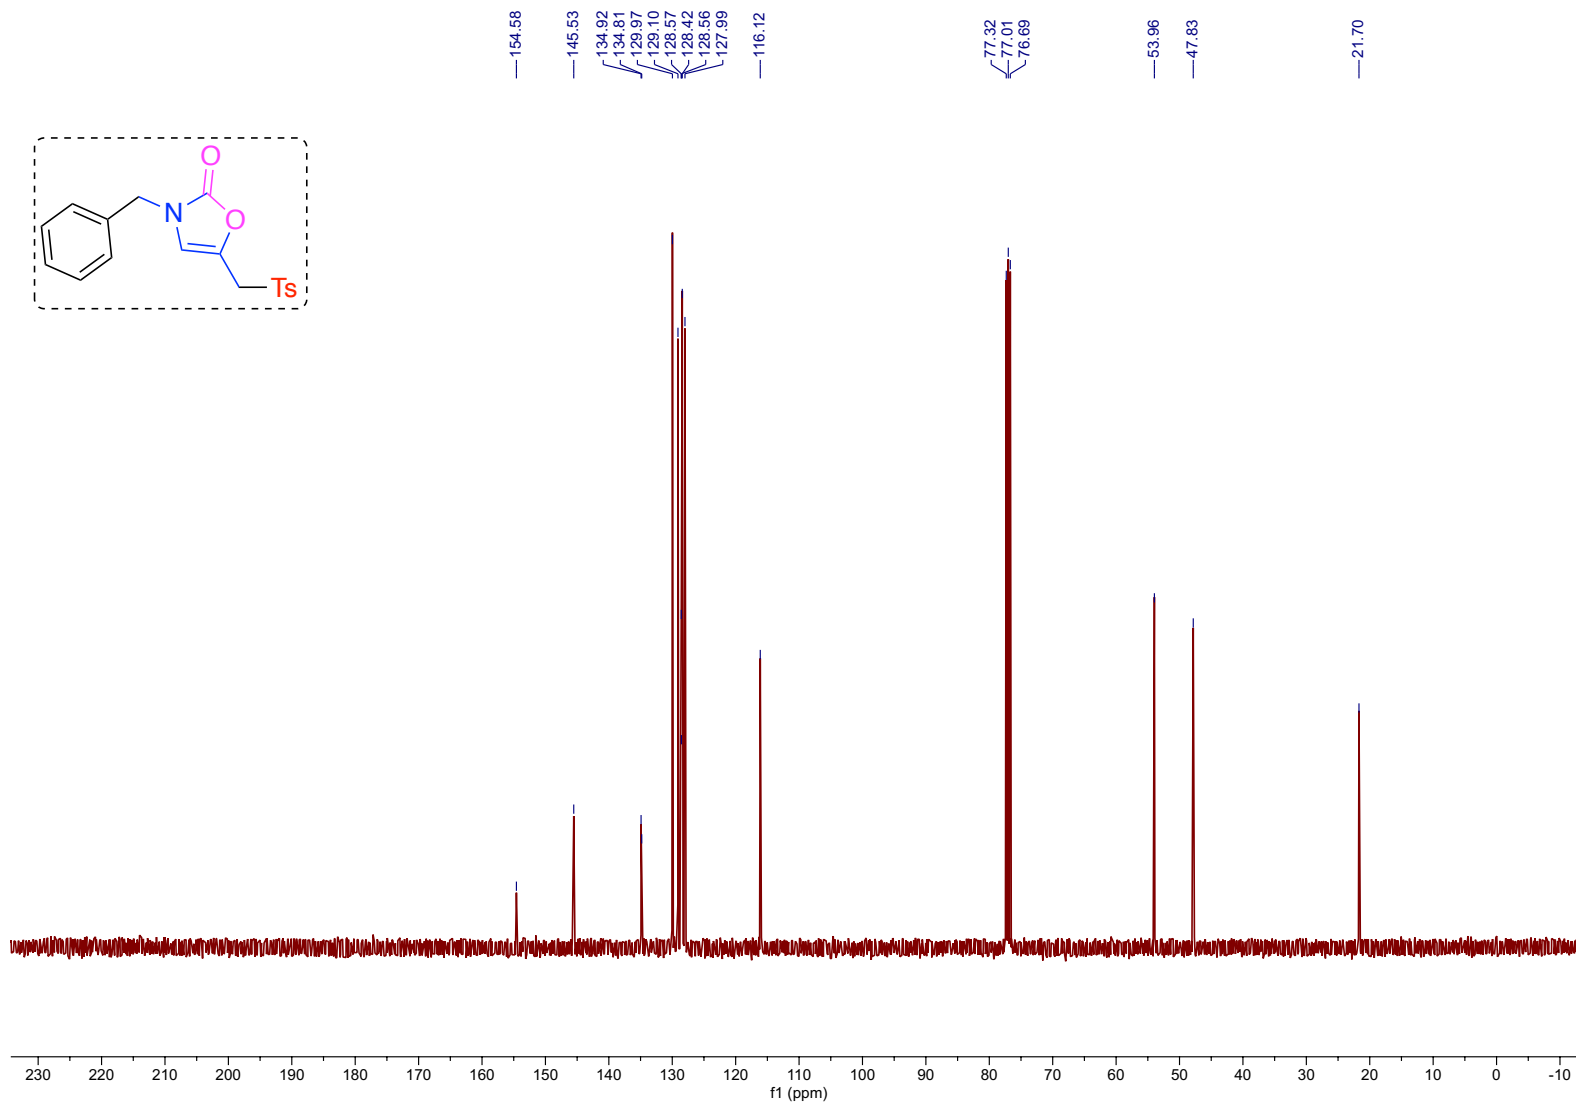

$^{13}\text{C}$  (101 MHz) spectrum of compound 3a in  $\text{CDCl}_3$

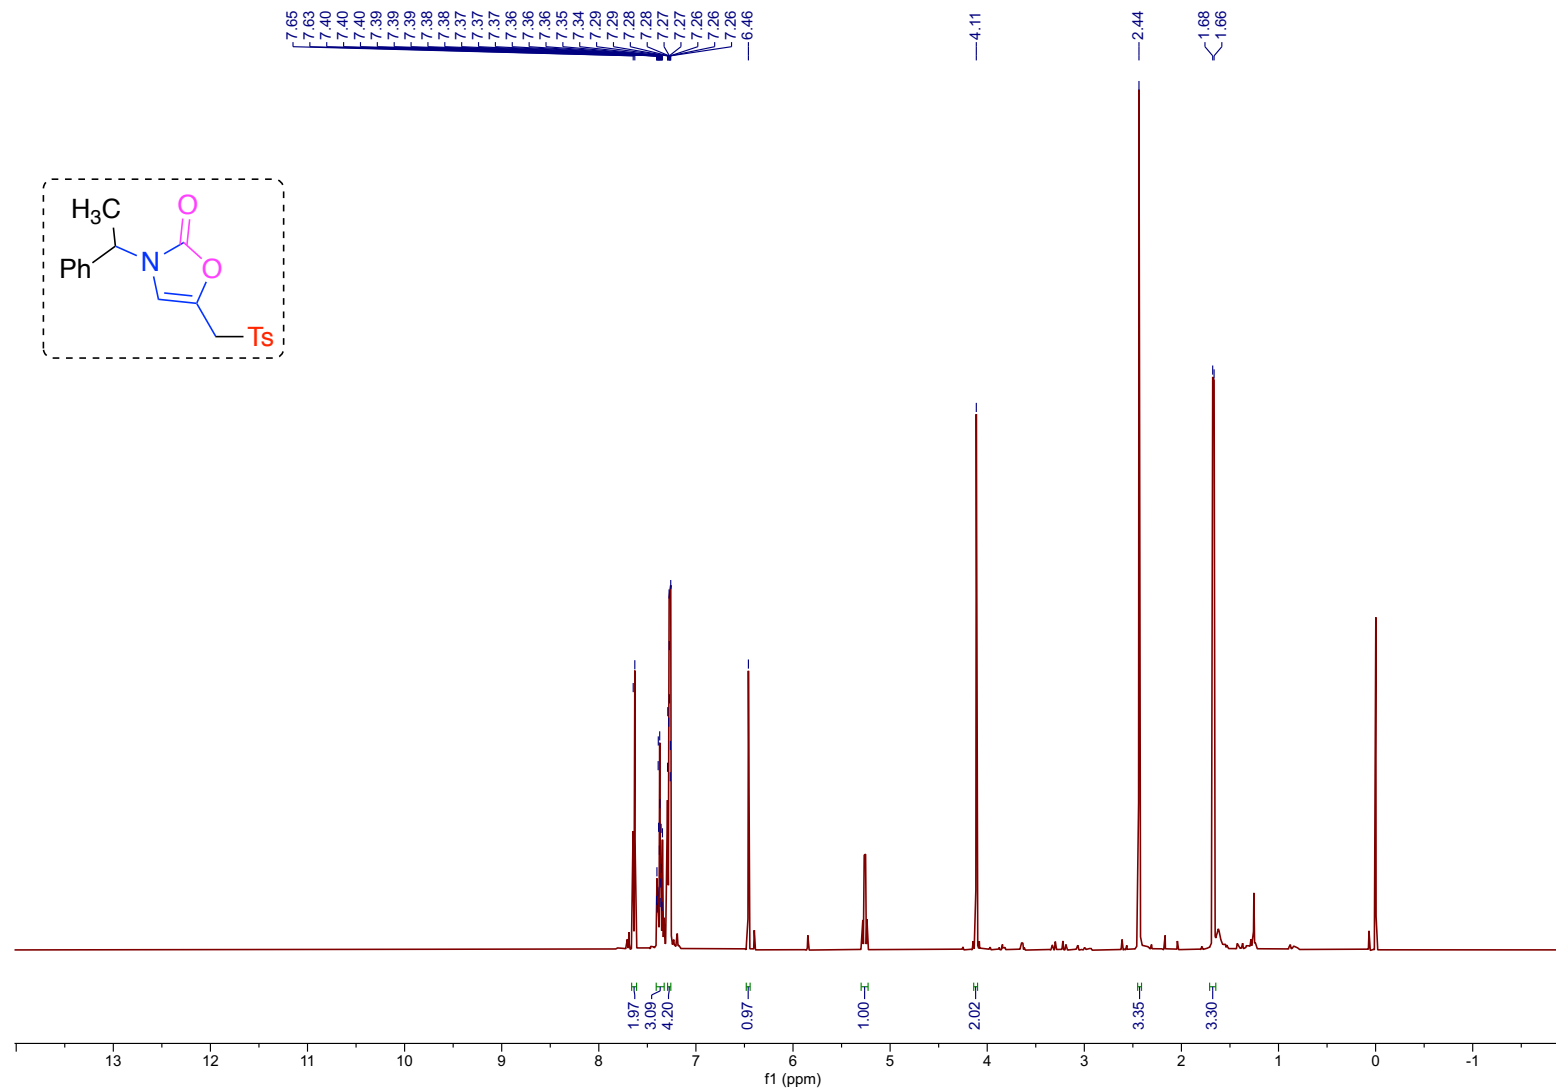

<sup>1</sup>H (500 MHz) spectrum of compound 3b in CDCl<sub>3</sub>

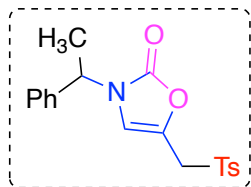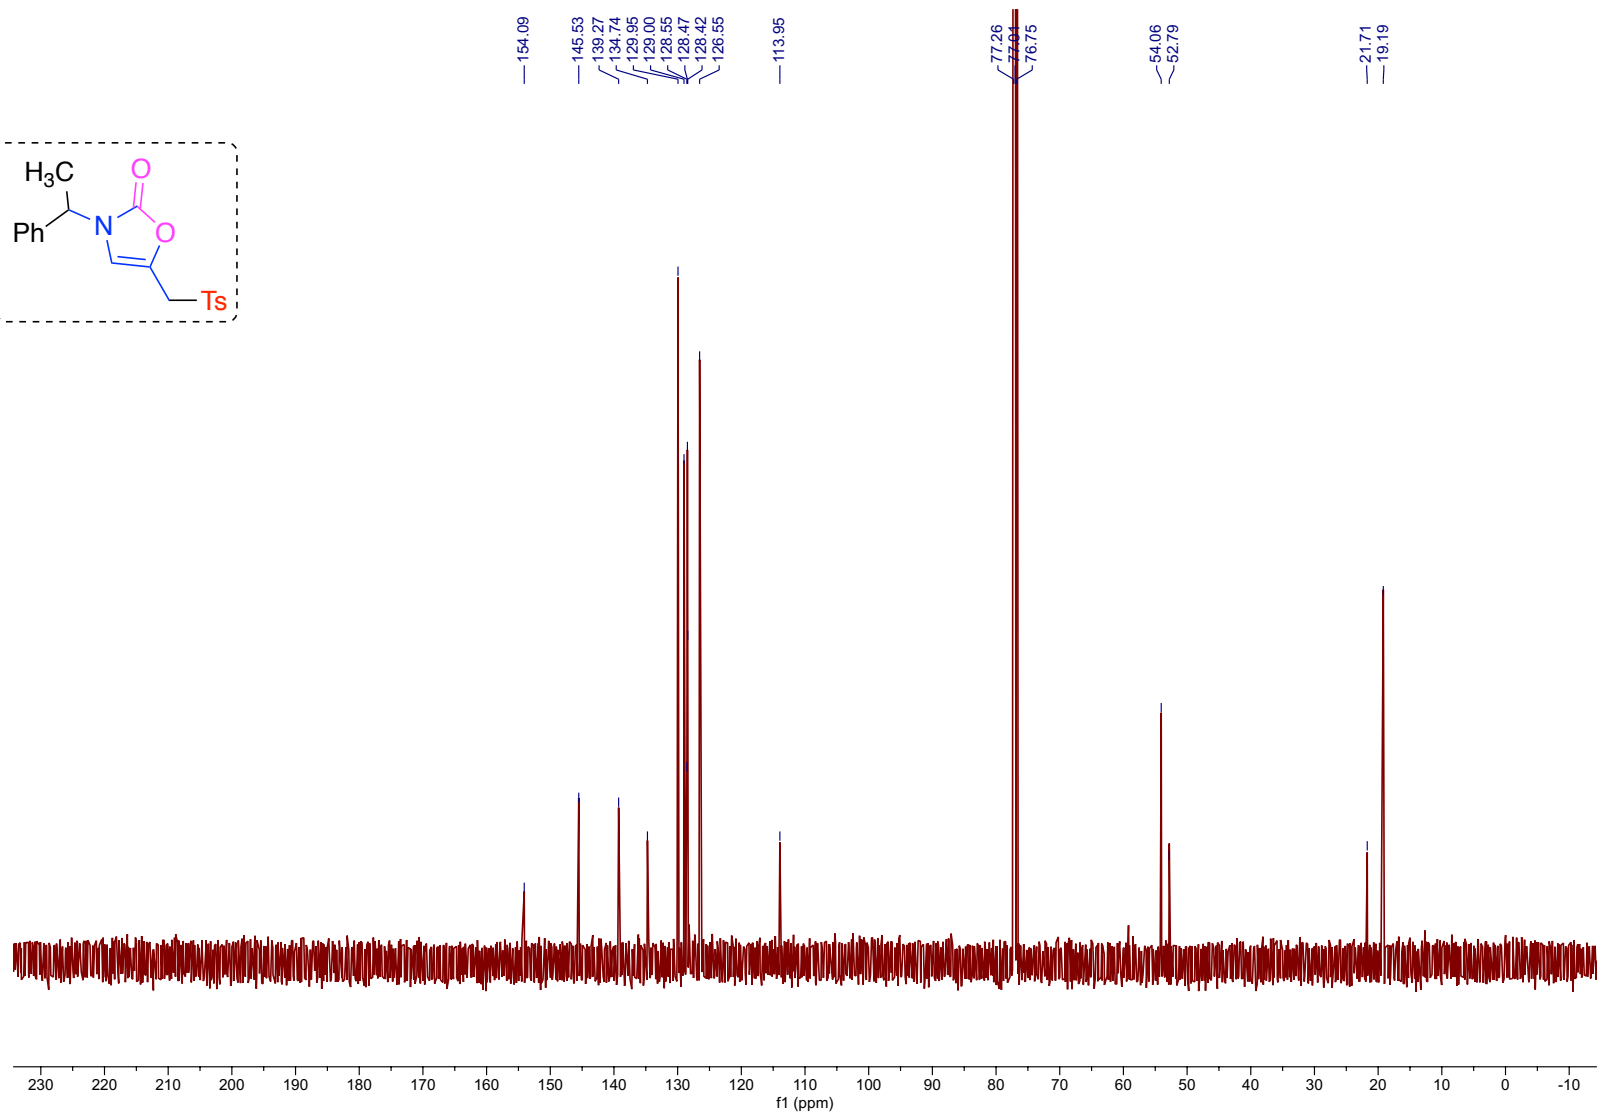

<sup>13</sup>C (126 MHz) spectrum of compound 3b in CDCl<sub>3</sub>

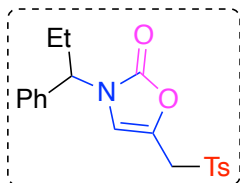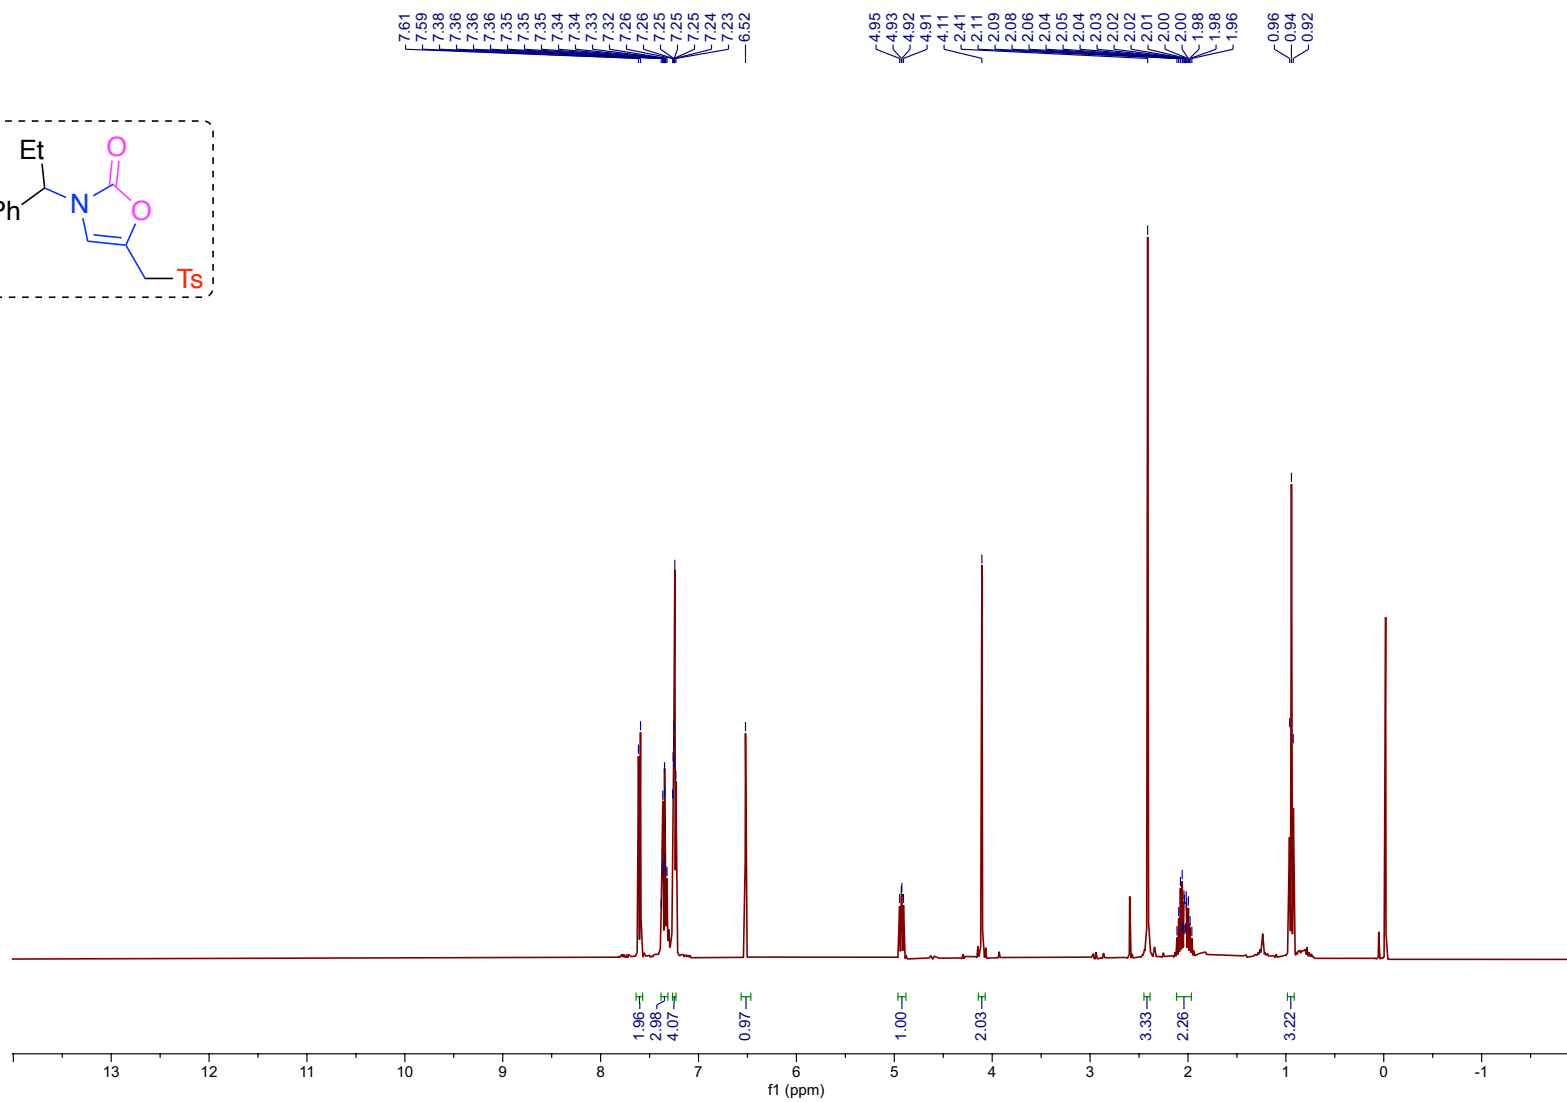

<sup>1</sup>H (400 MHz) spectrum of compound 3c in CDCl<sub>3</sub>

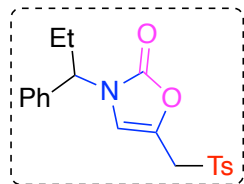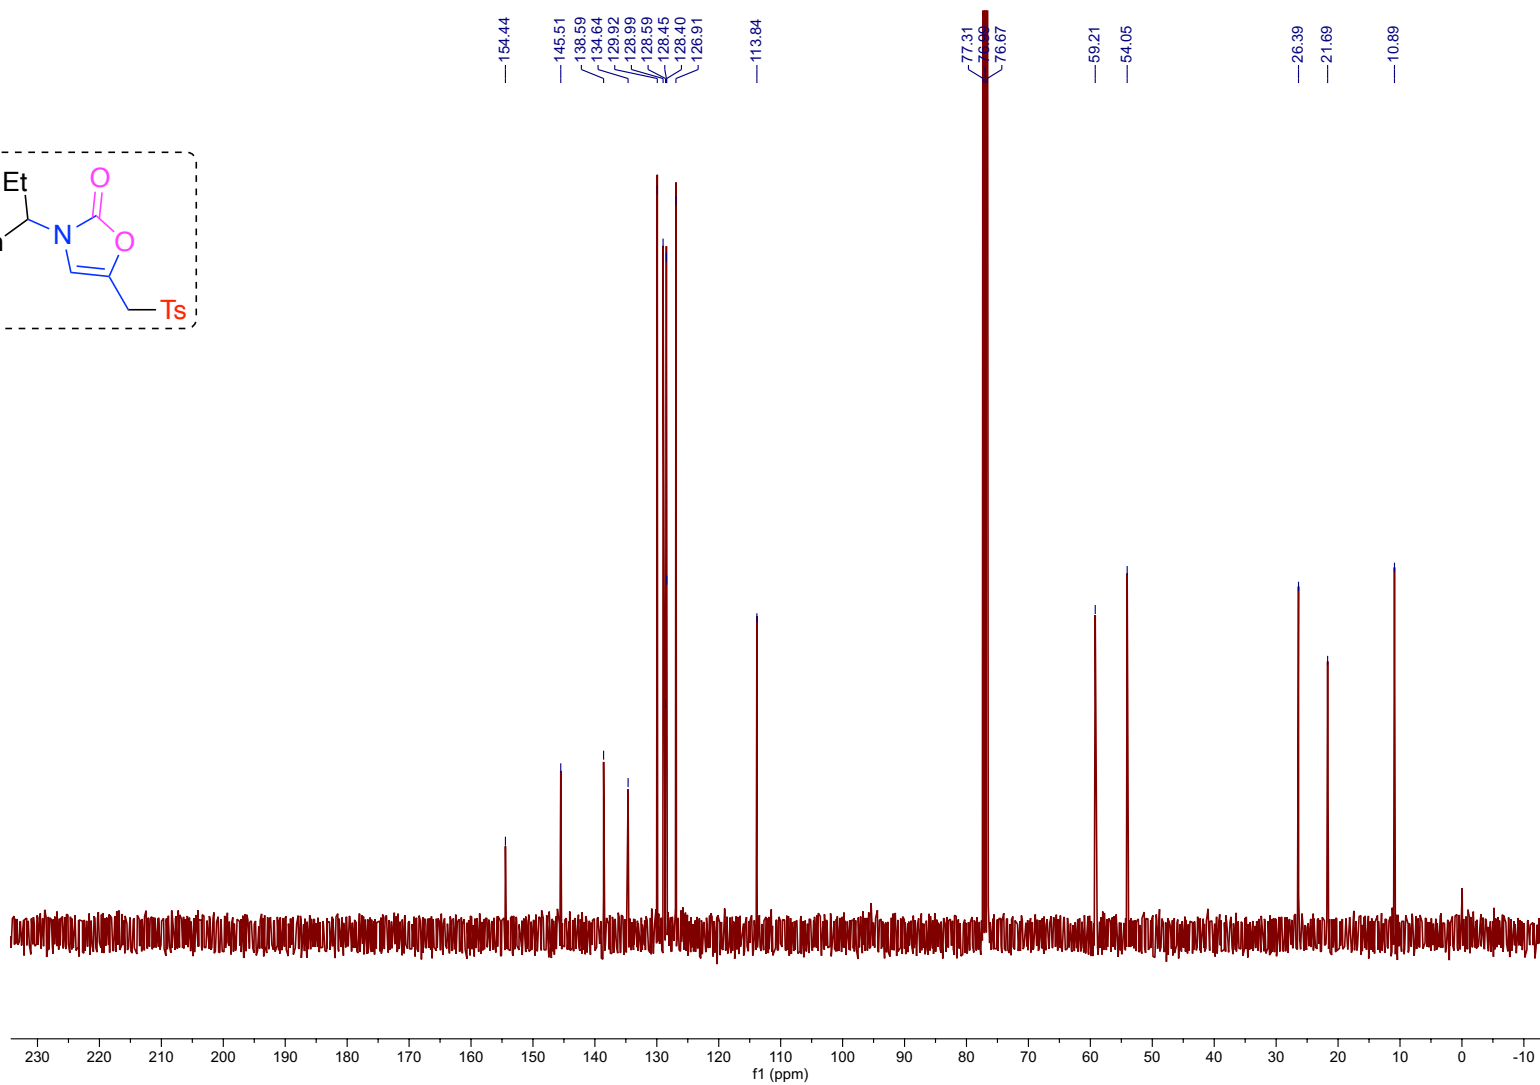

$^{13}\text{C}$  (101 MHz) spectrum of compound 3c in  $\text{CDCl}_3$

S24



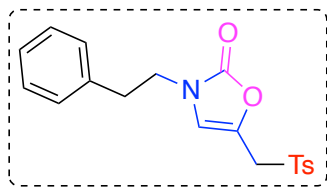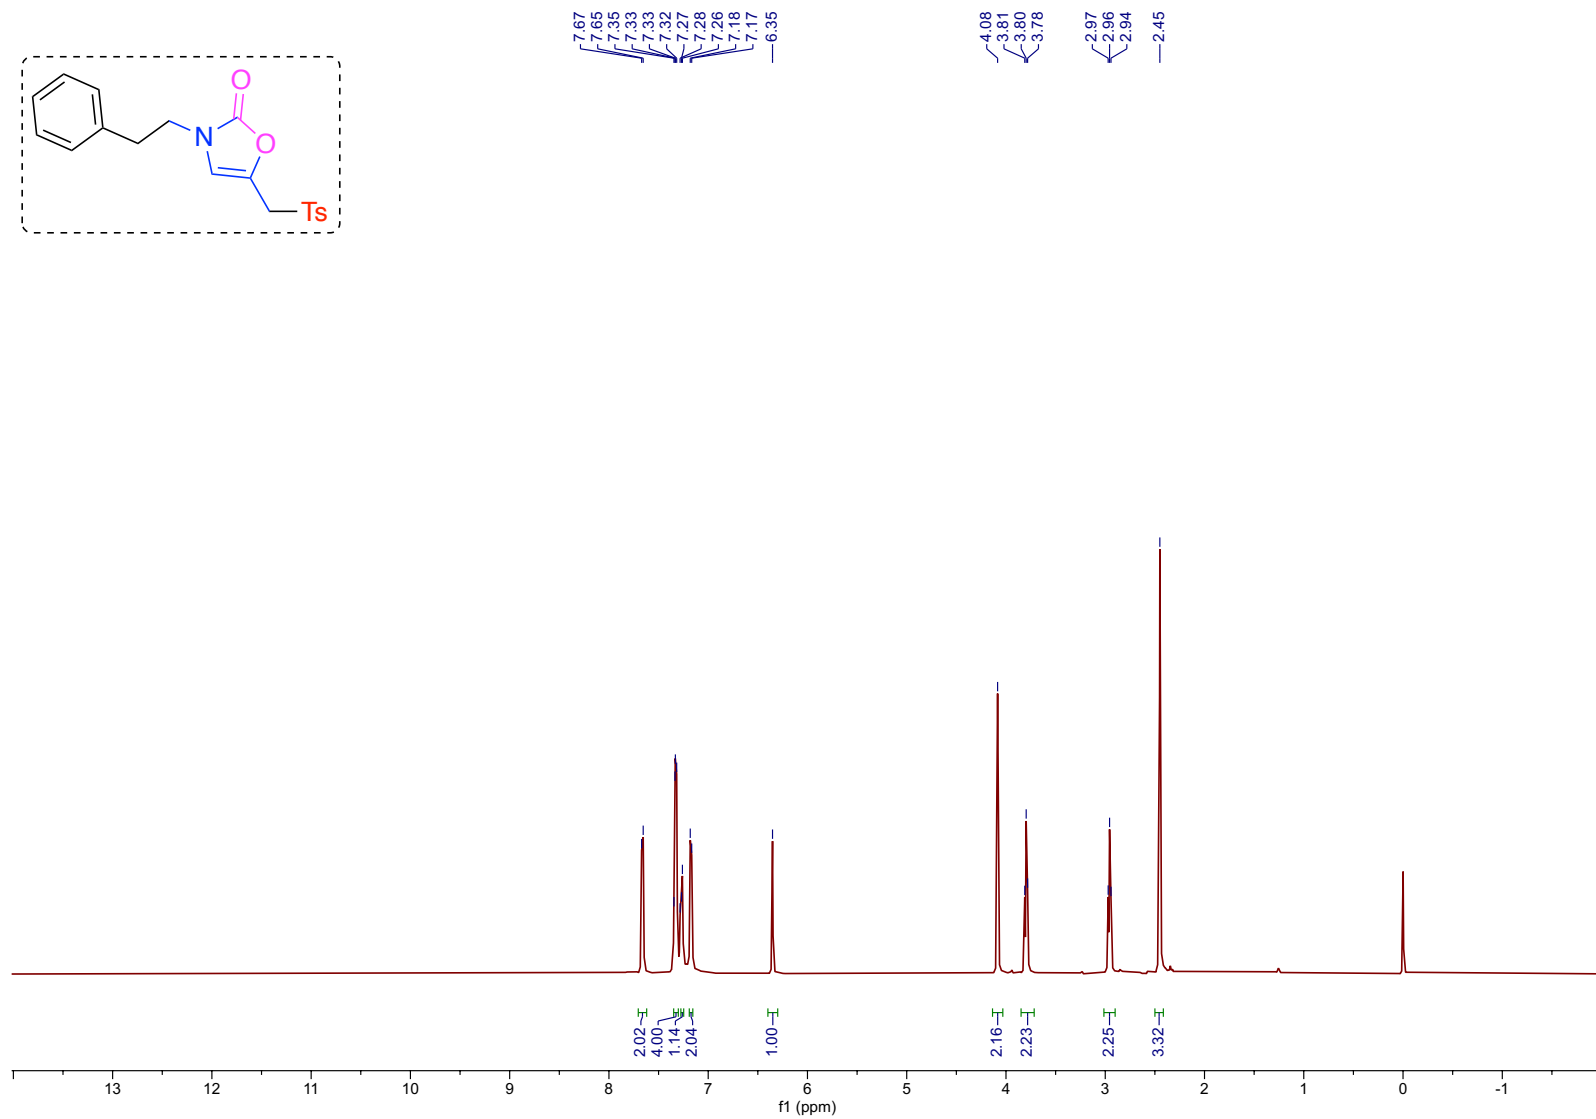

$^1\text{H}$  (500 MHz) spectrum of compound 3d in  $\text{CDCl}_3$

S25

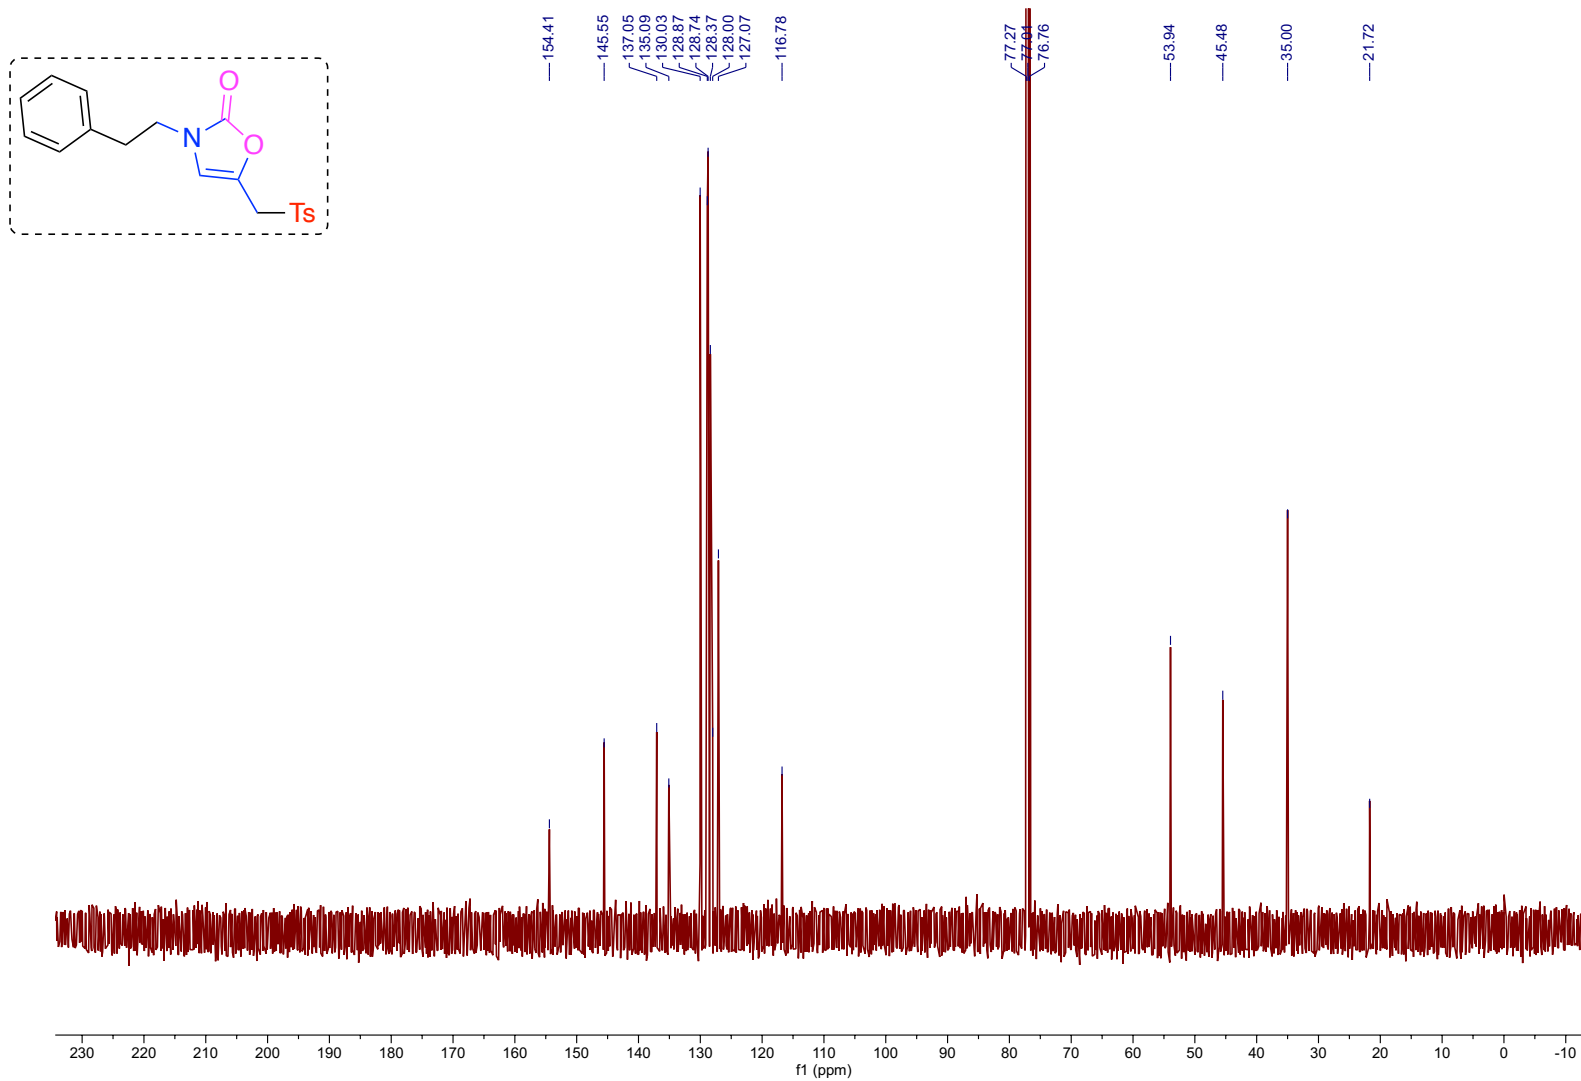

$^{13}\text{C}$  (126 MHz) spectrum of compound 3d in  $\text{CDCl}_3$

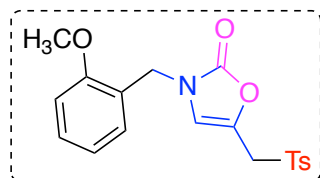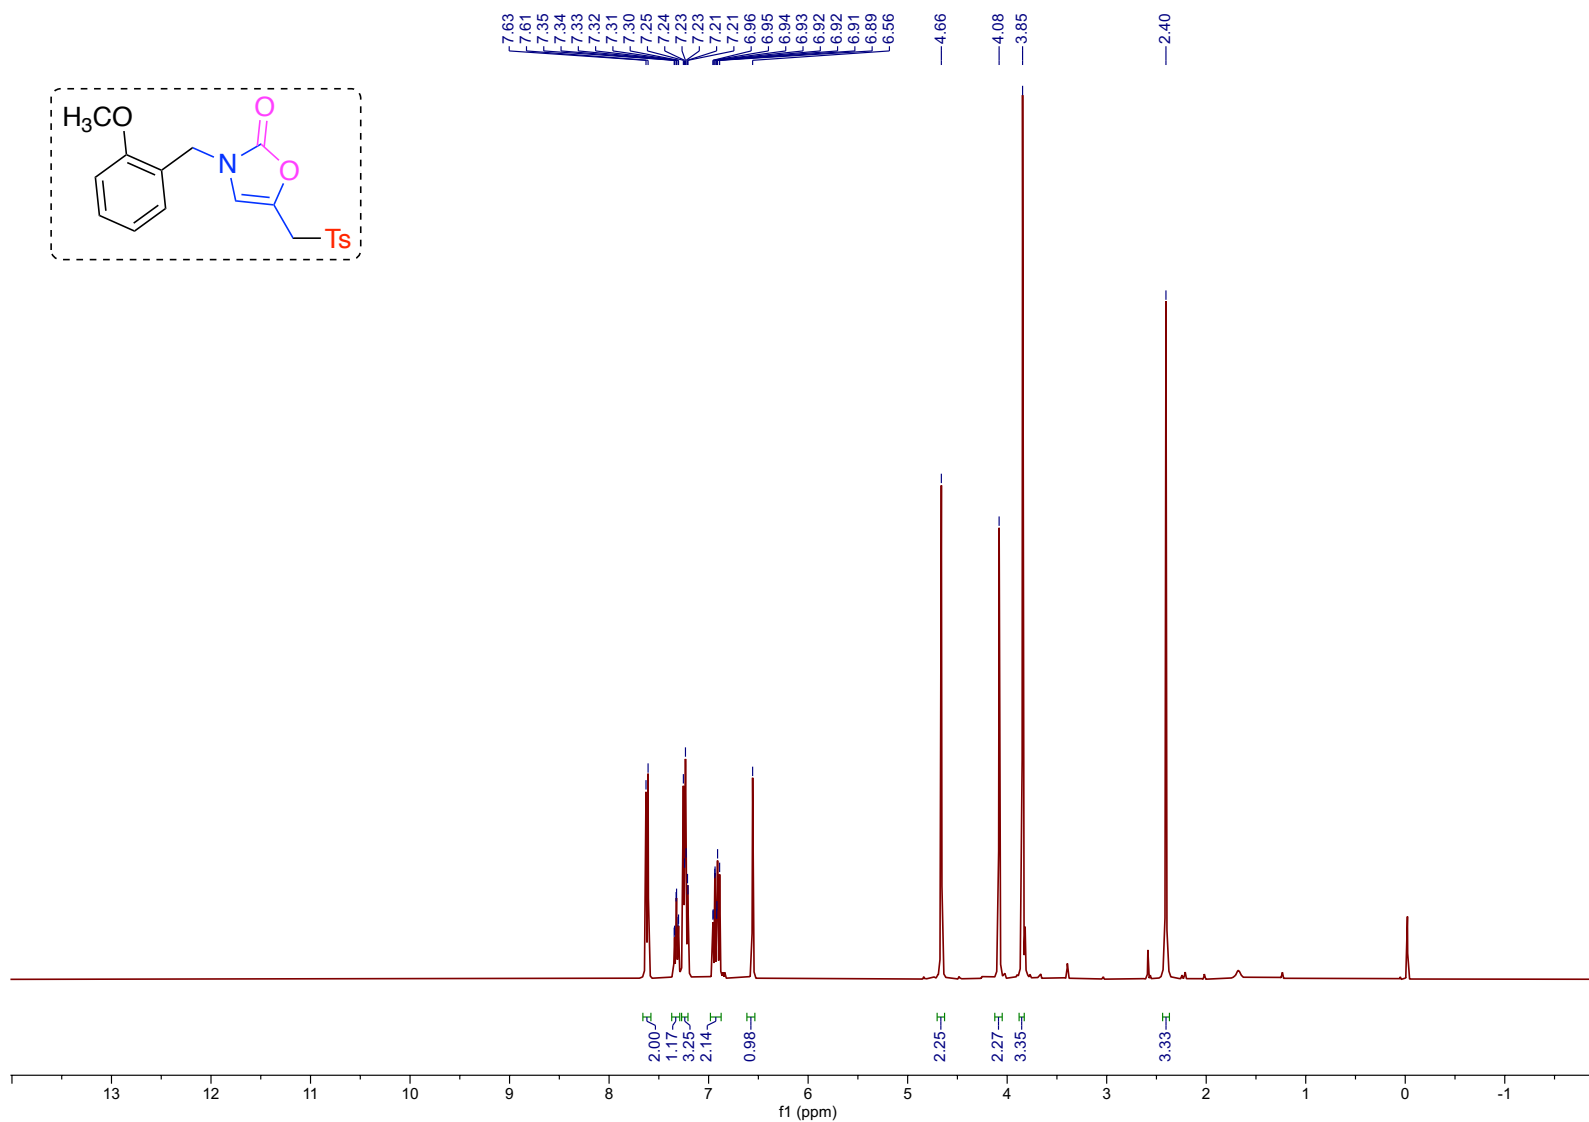

$^1\text{H}$  (400 MHz) spectrum of compound 3e in  $\text{CDCl}_3$

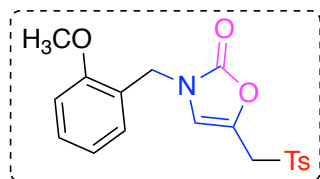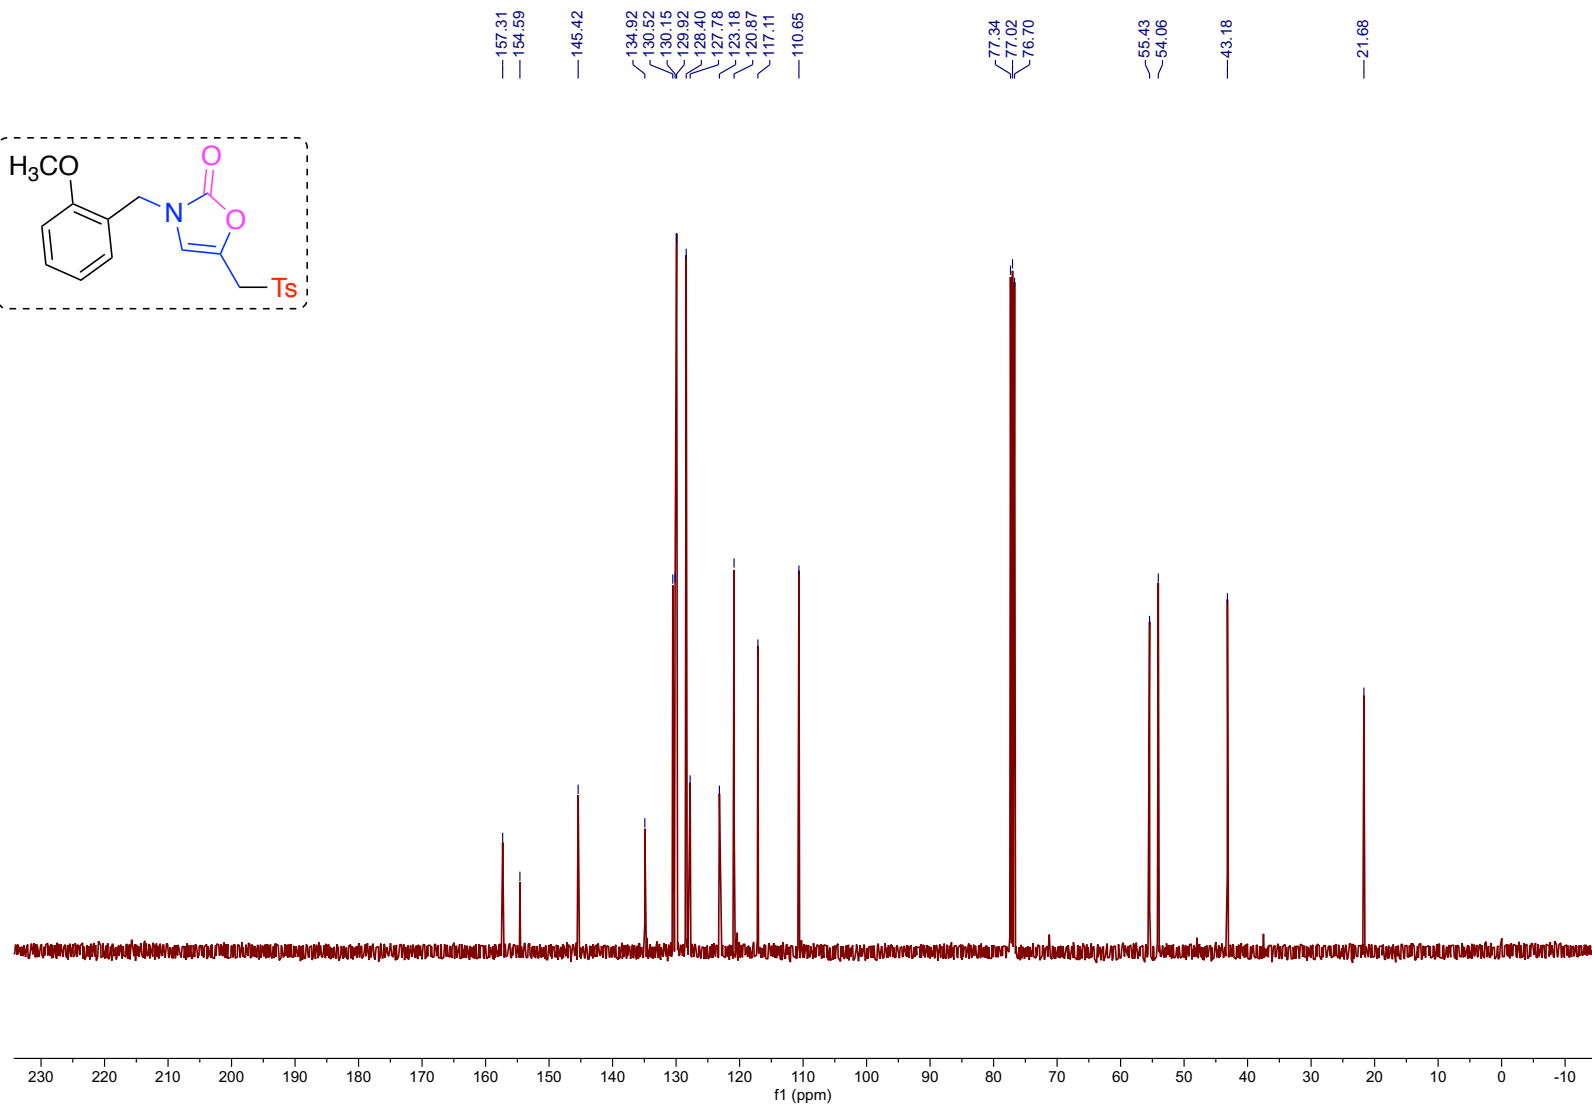

$^{13}\text{C}$  (101 MHz) spectrum of compound 3e in  $\text{CDCl}_3$

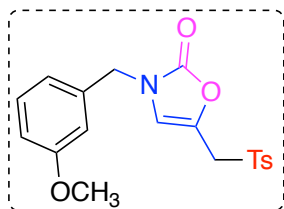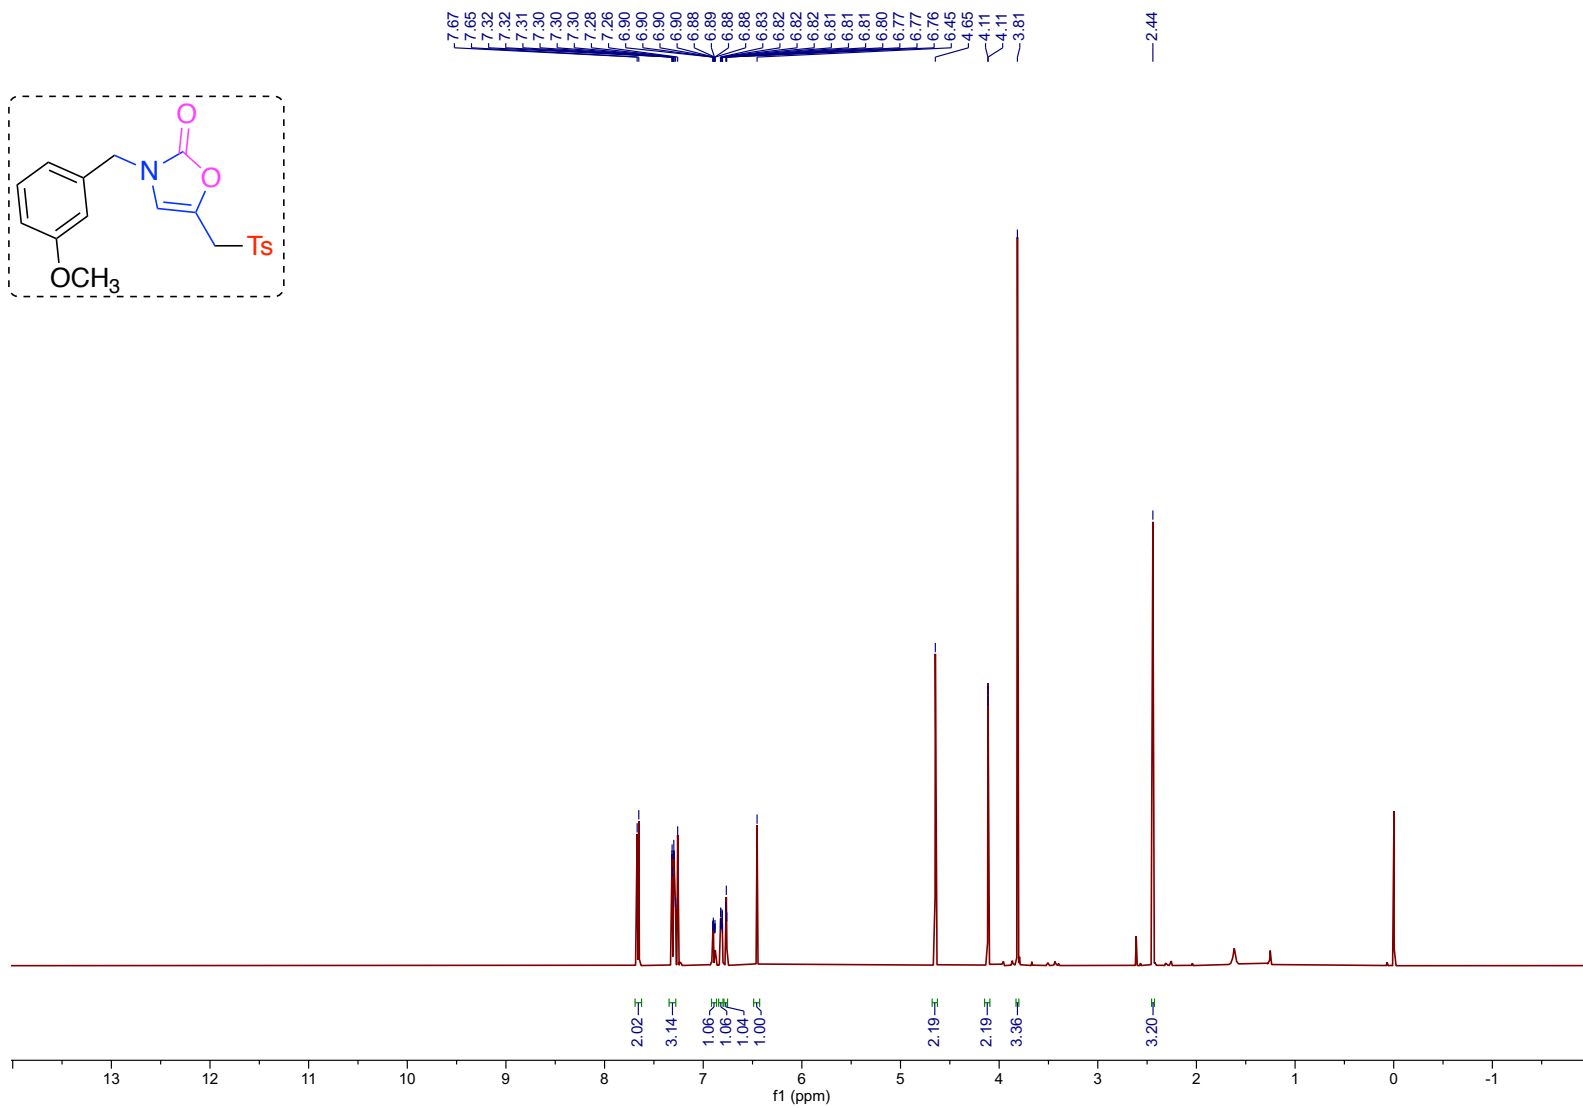

<sup>1</sup>H (500 MHz) spectrum of compound 3f in CDCl<sub>3</sub>

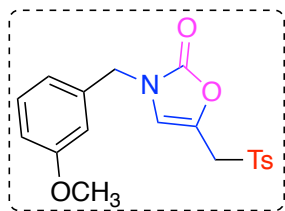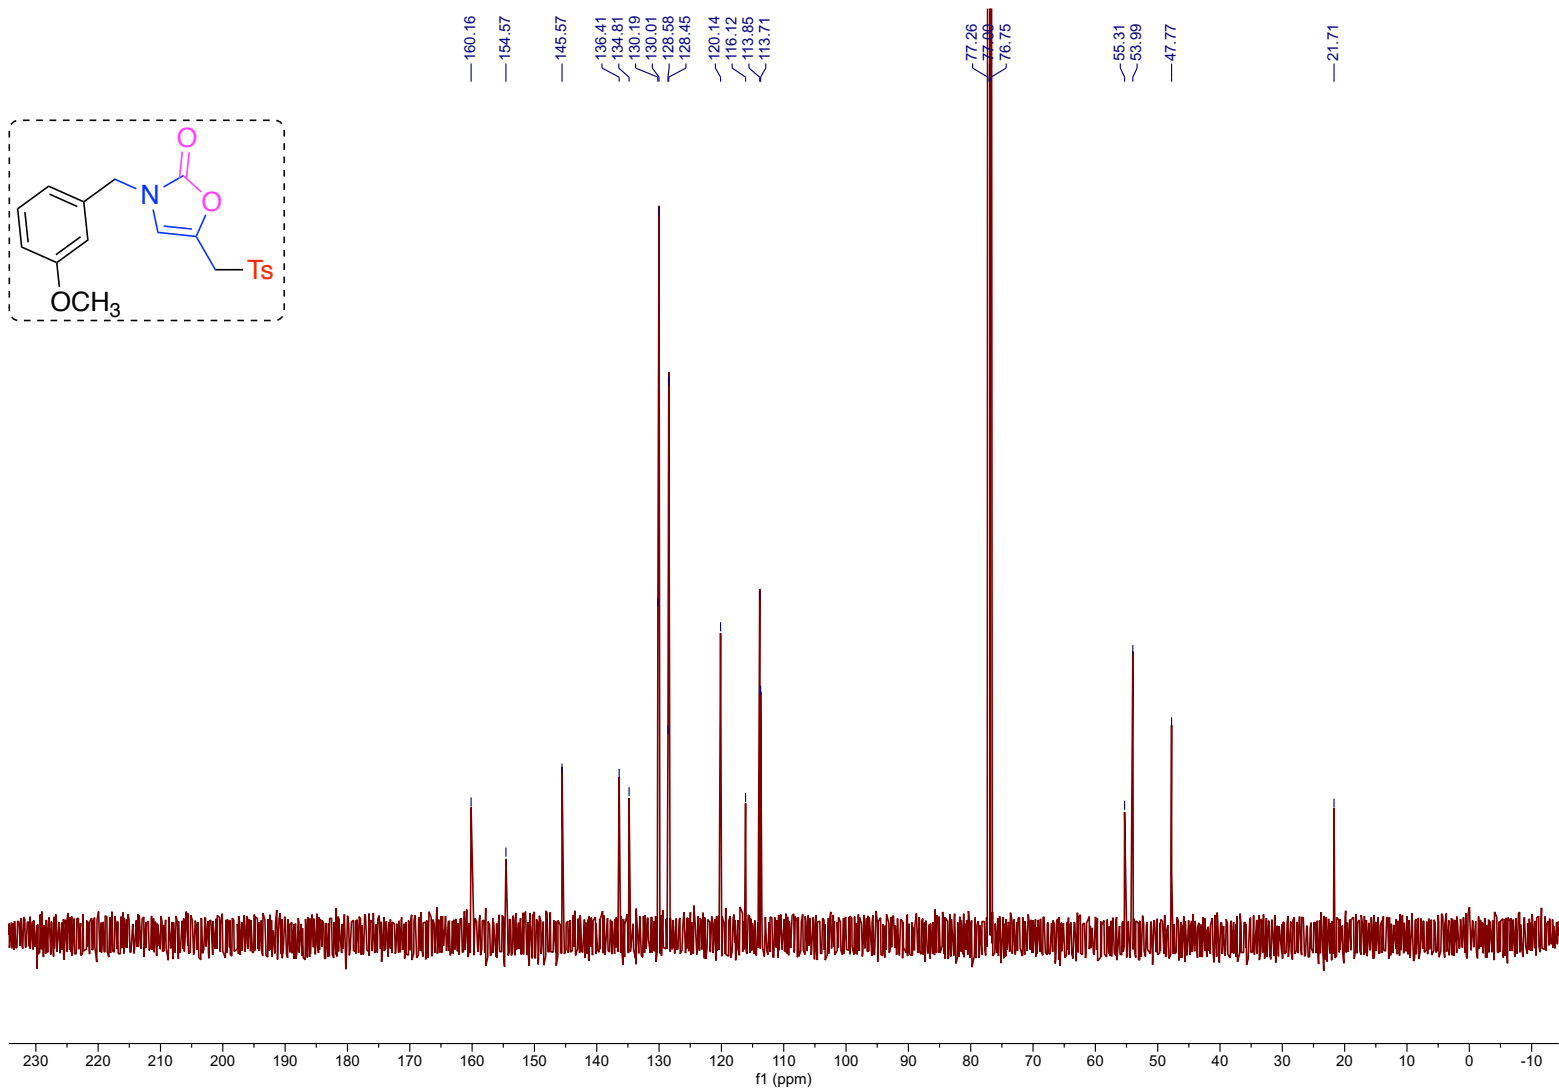

$^{13}\text{C}$  (126 MHz) spectrum of compound 3f in  $\text{CDCl}_3$

S30

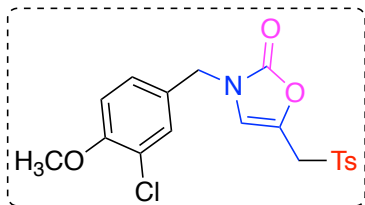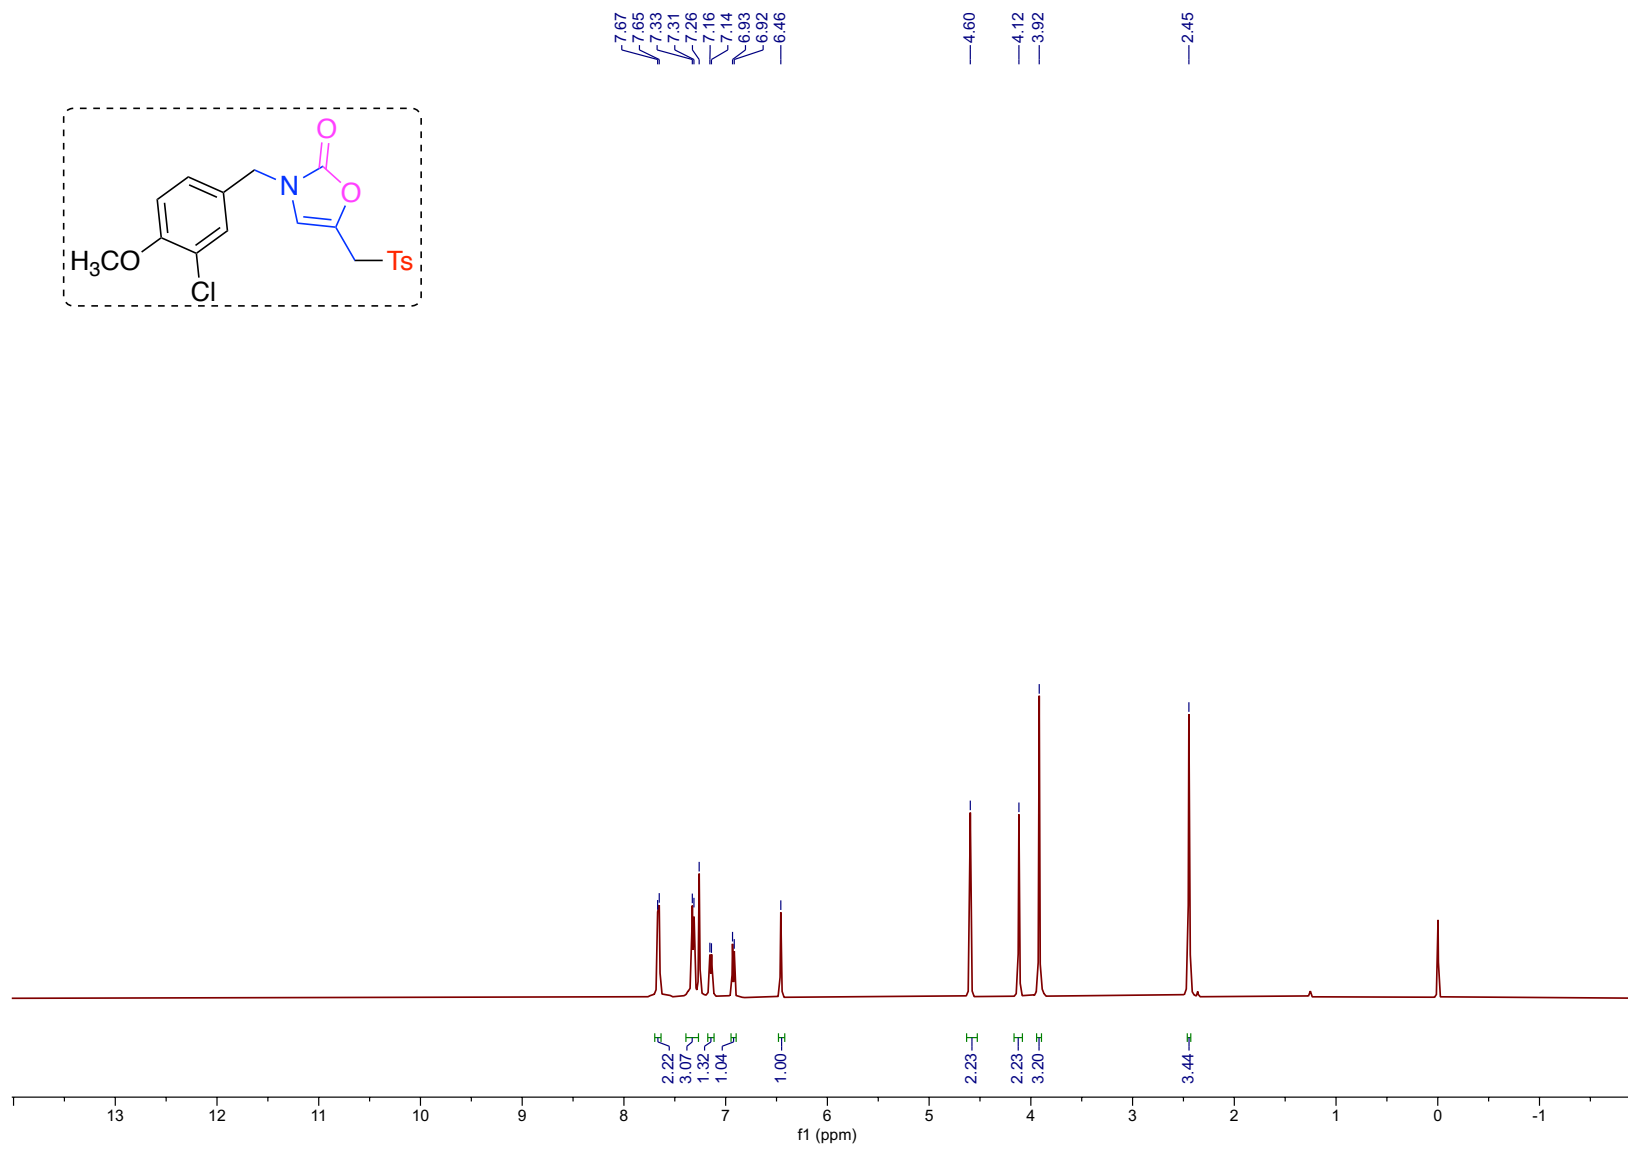

<sup>1</sup>H (500 MHz) spectrum of compound 3g in CDCl<sub>3</sub>

S31

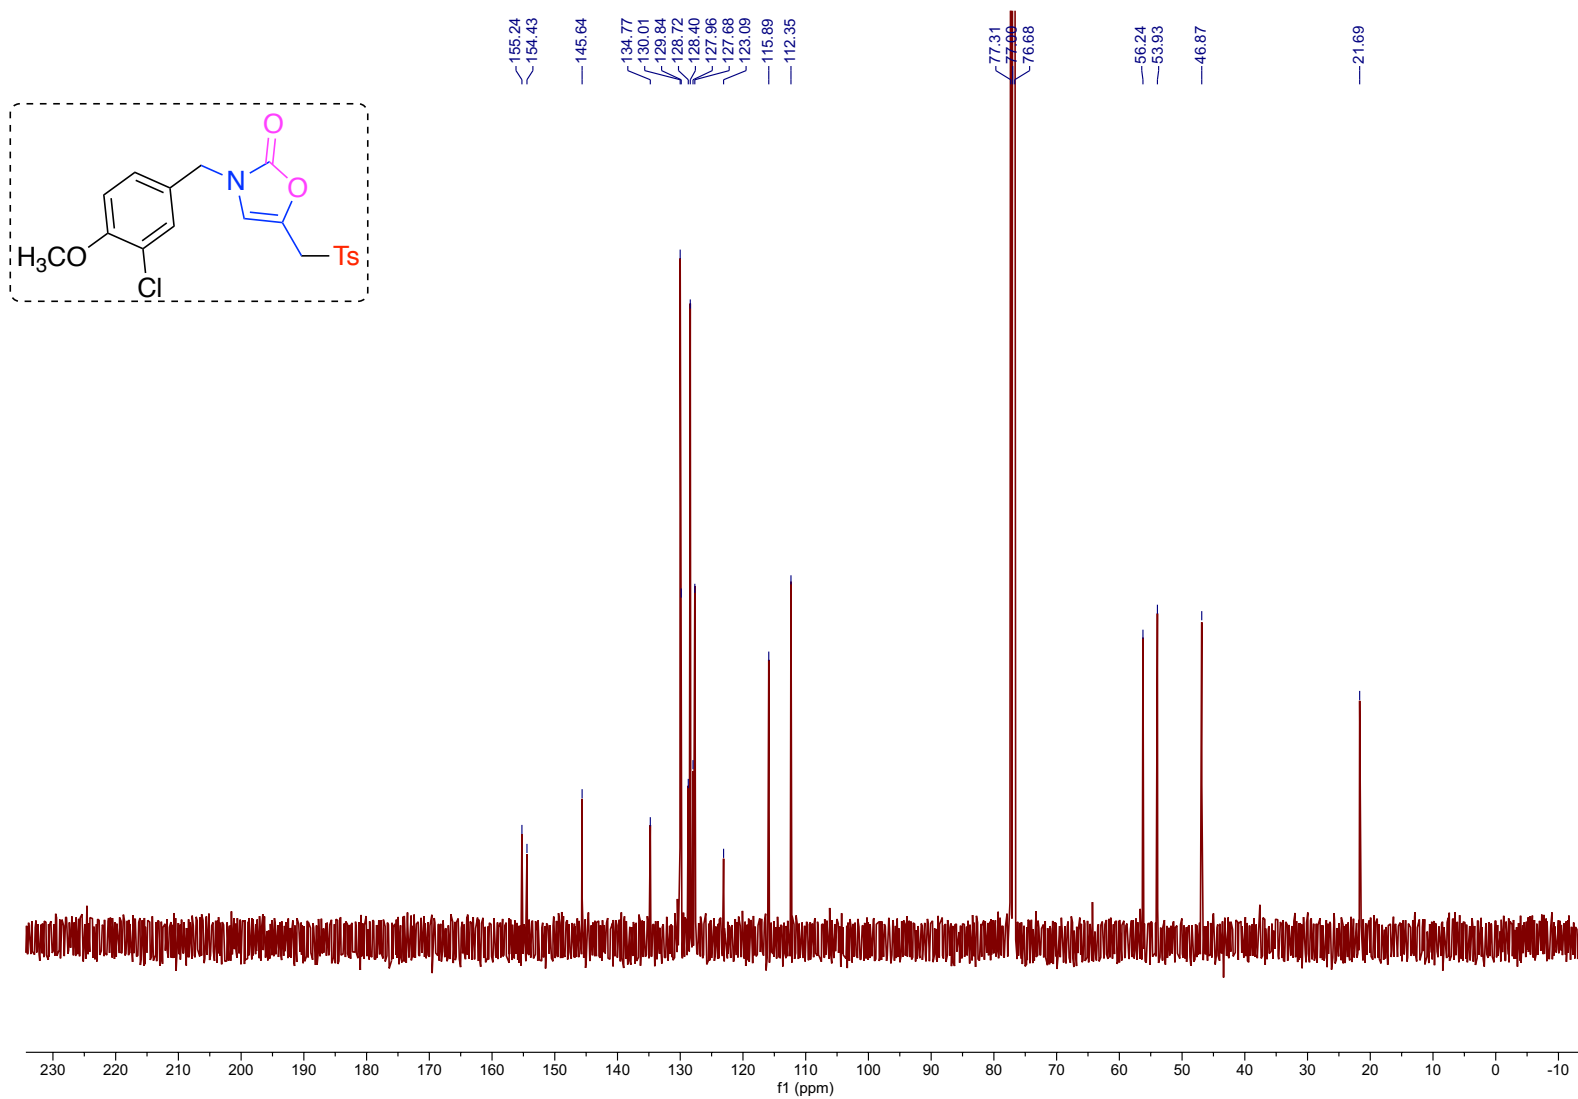

$^{13}\text{C}$  (101 MHz) spectrum of compound 3g in  $\text{CDCl}_3$



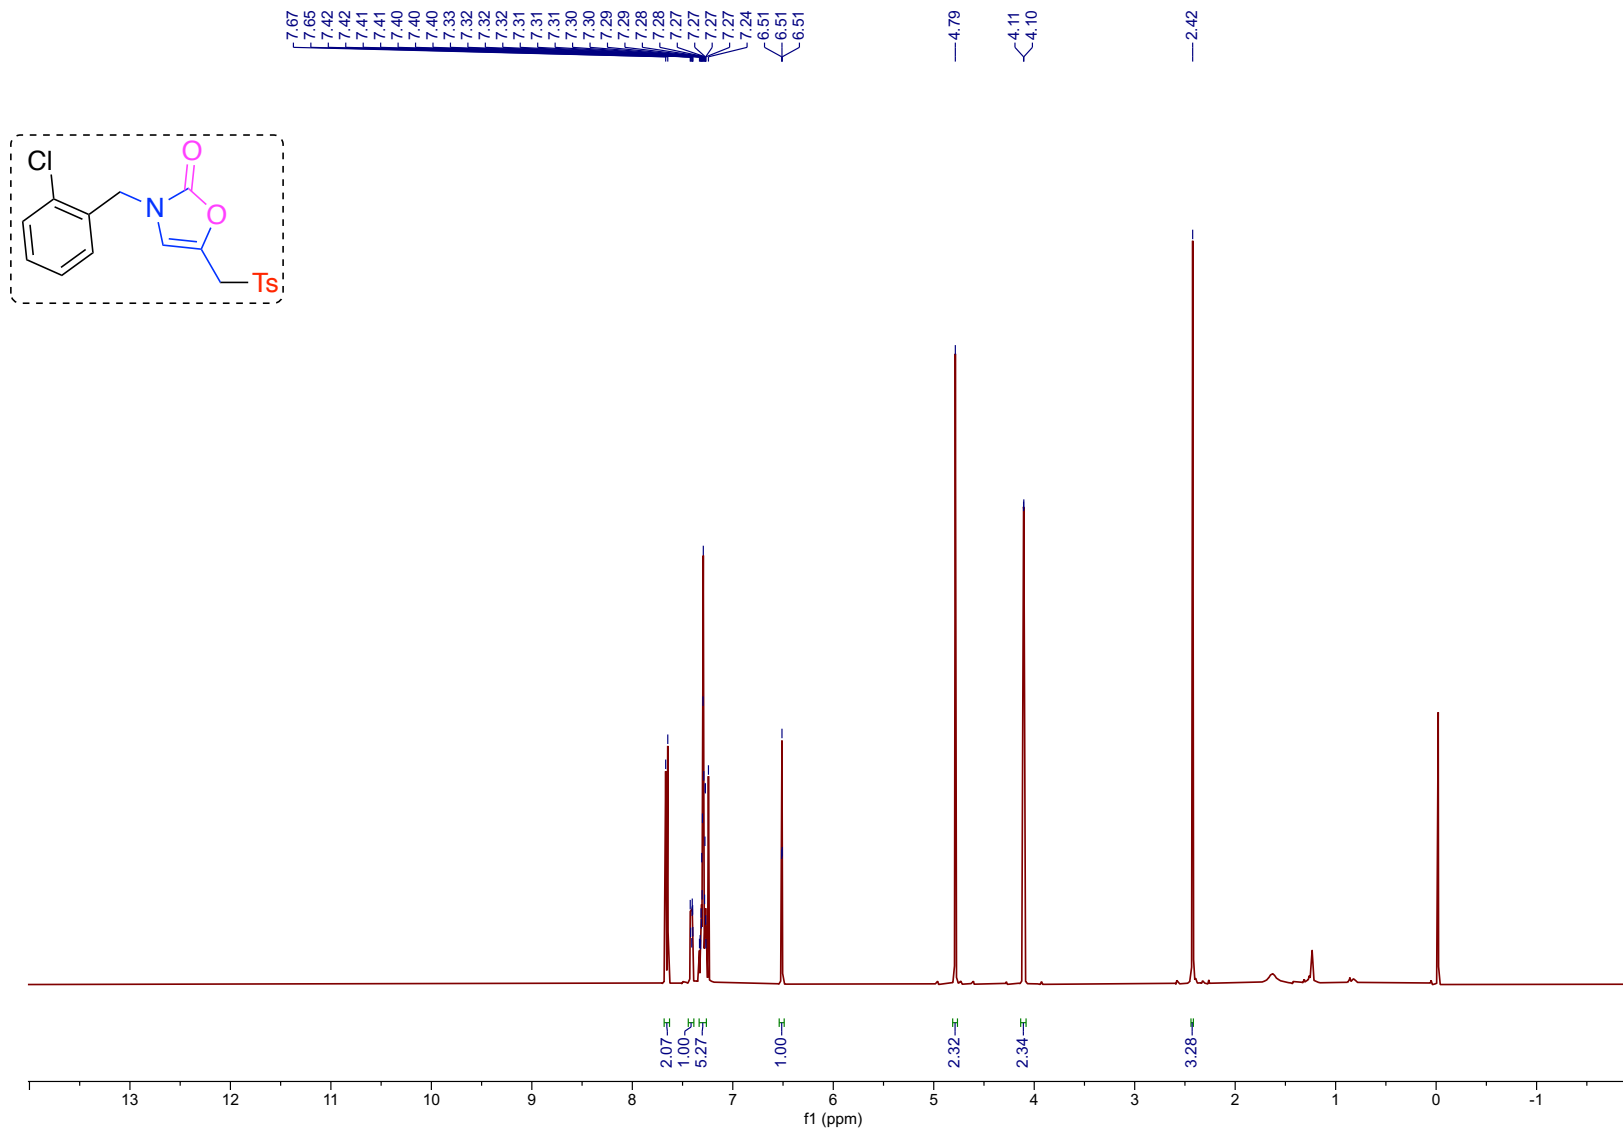

$^1\text{H}$  (400 MHz) spectrum of compound 3h in  $\text{CDCl}_3$

S33

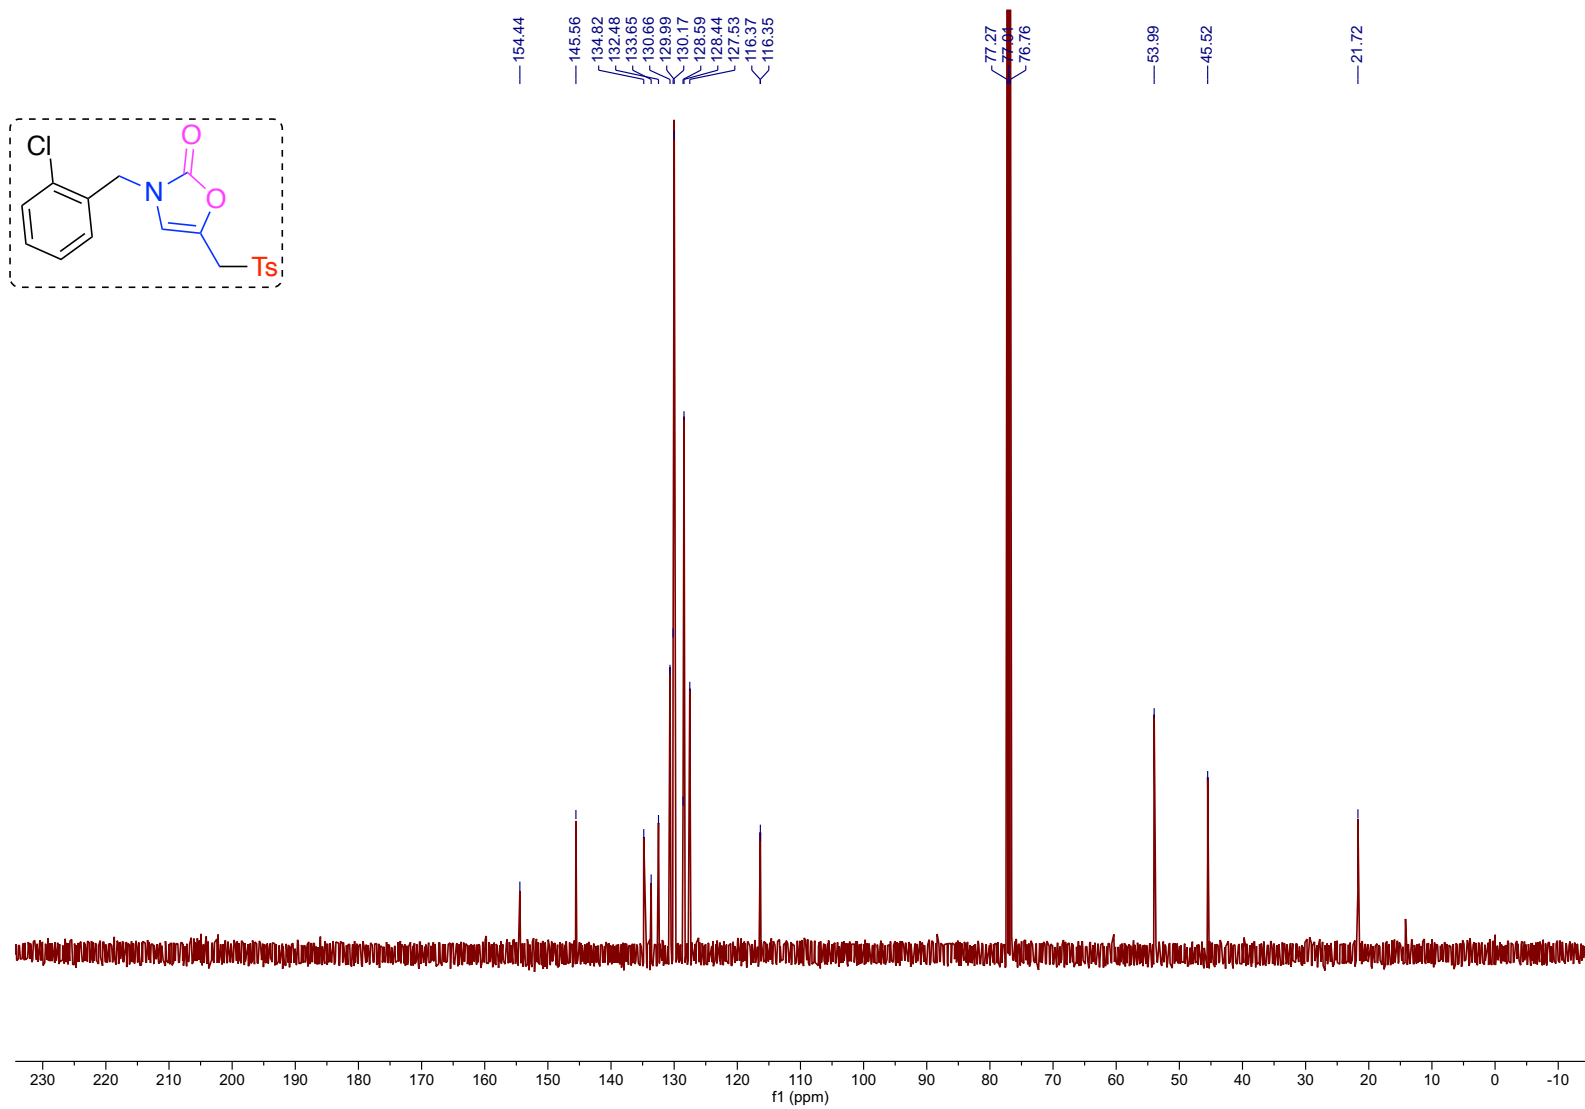

<sup>13</sup>C (126 MHz) spectrum of compound 3h in CDCl<sub>3</sub>

S34

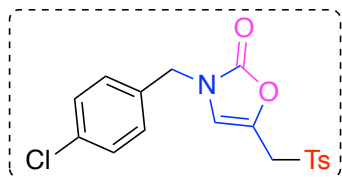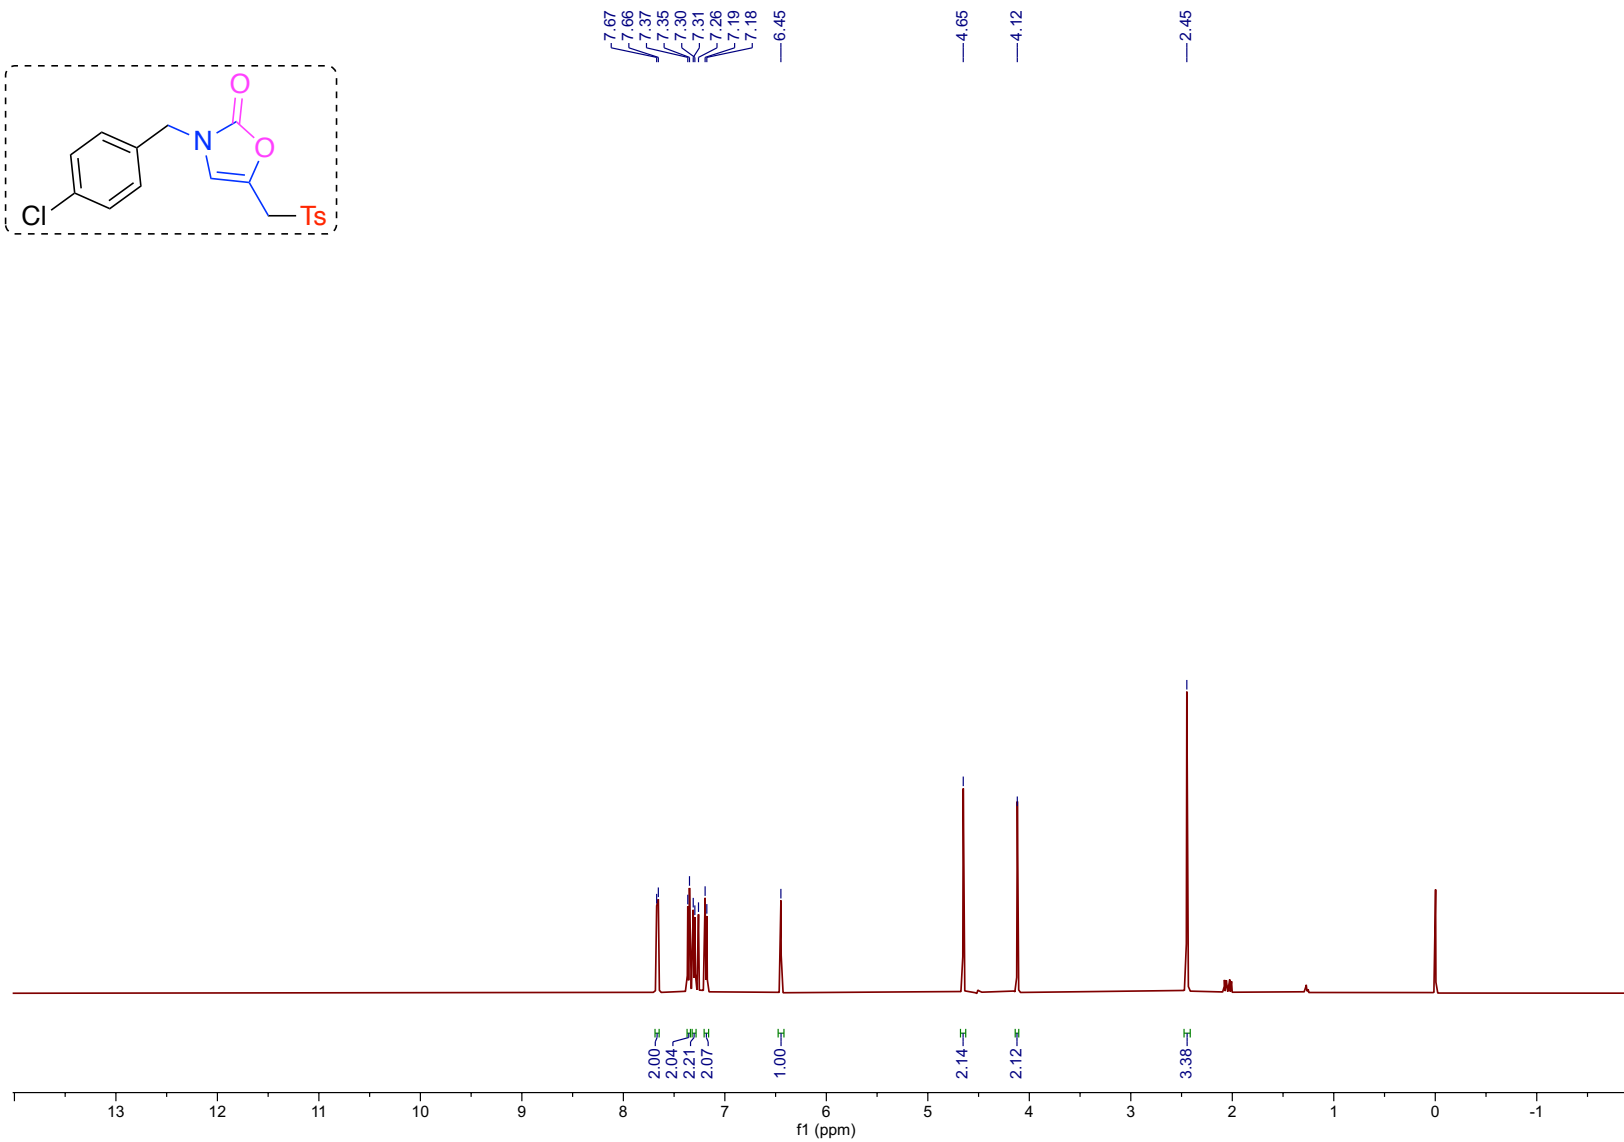

<sup>1</sup>H (500 MHz) spectrum of compound 3i in CDCl<sub>3</sub>

S35

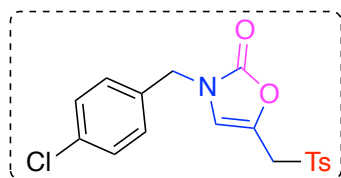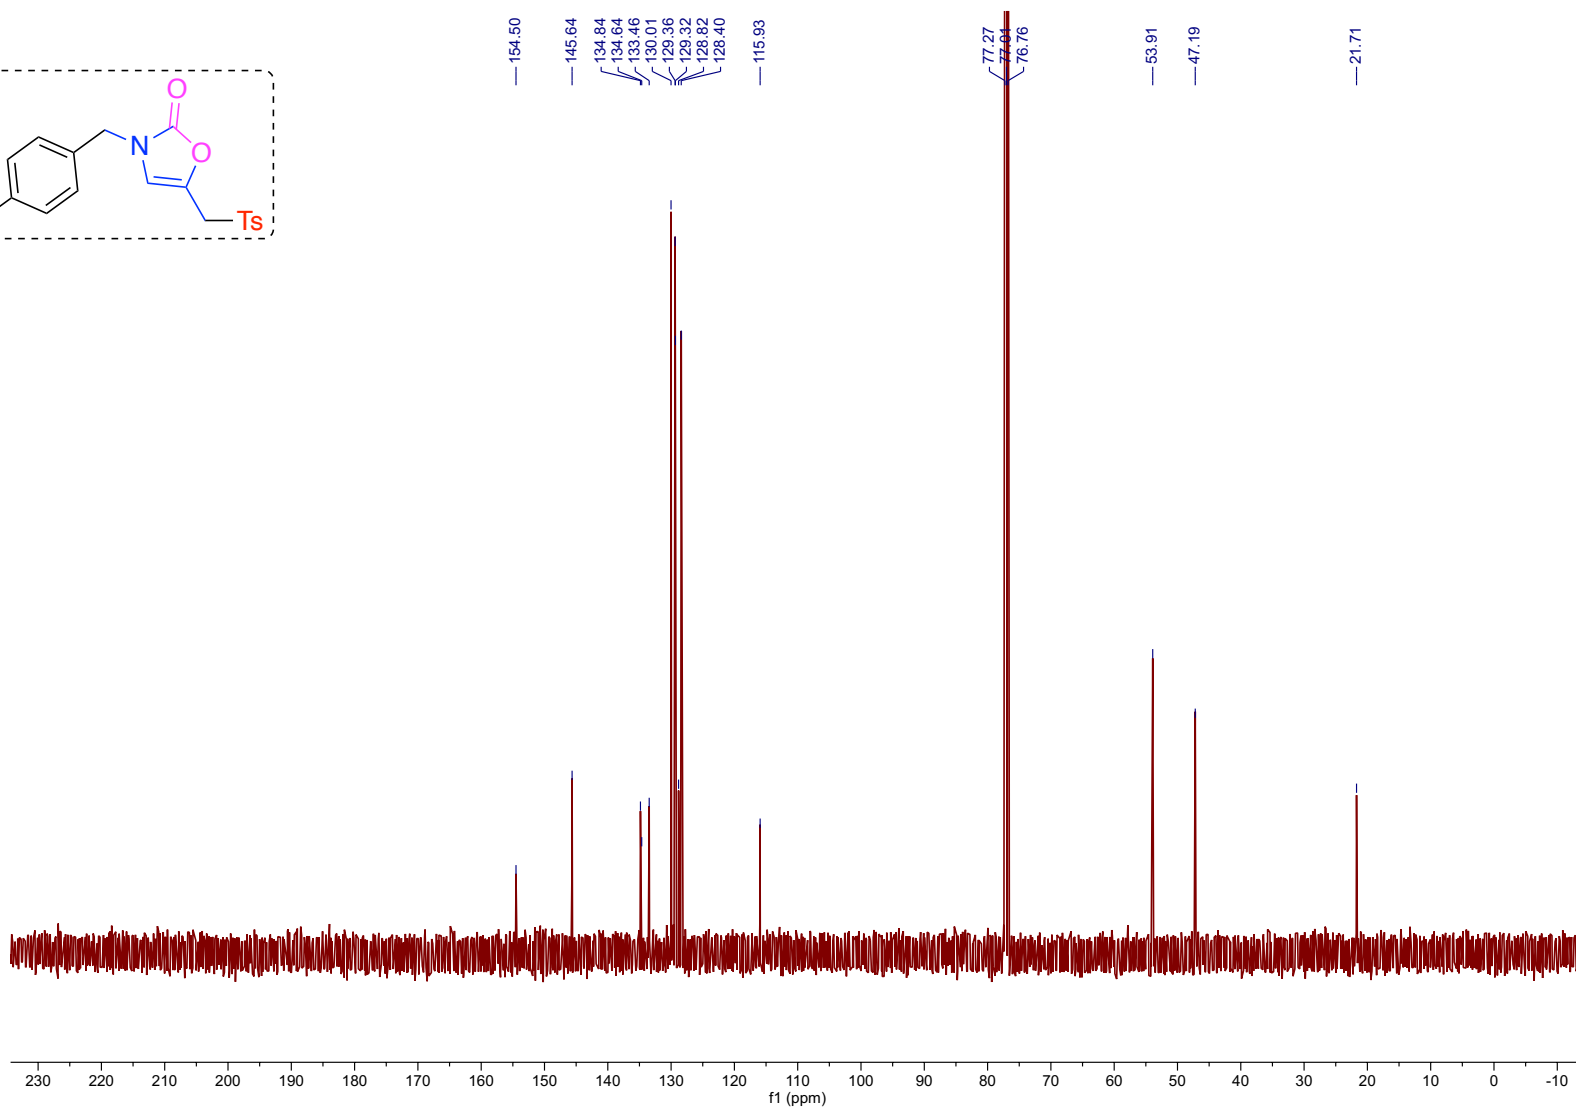

$^{13}\text{C}$  (126 MHz) spectrum of compound 3i in  $\text{CDCl}_3$

S36

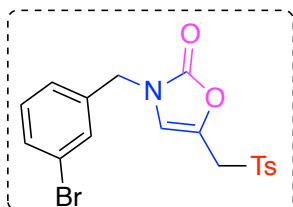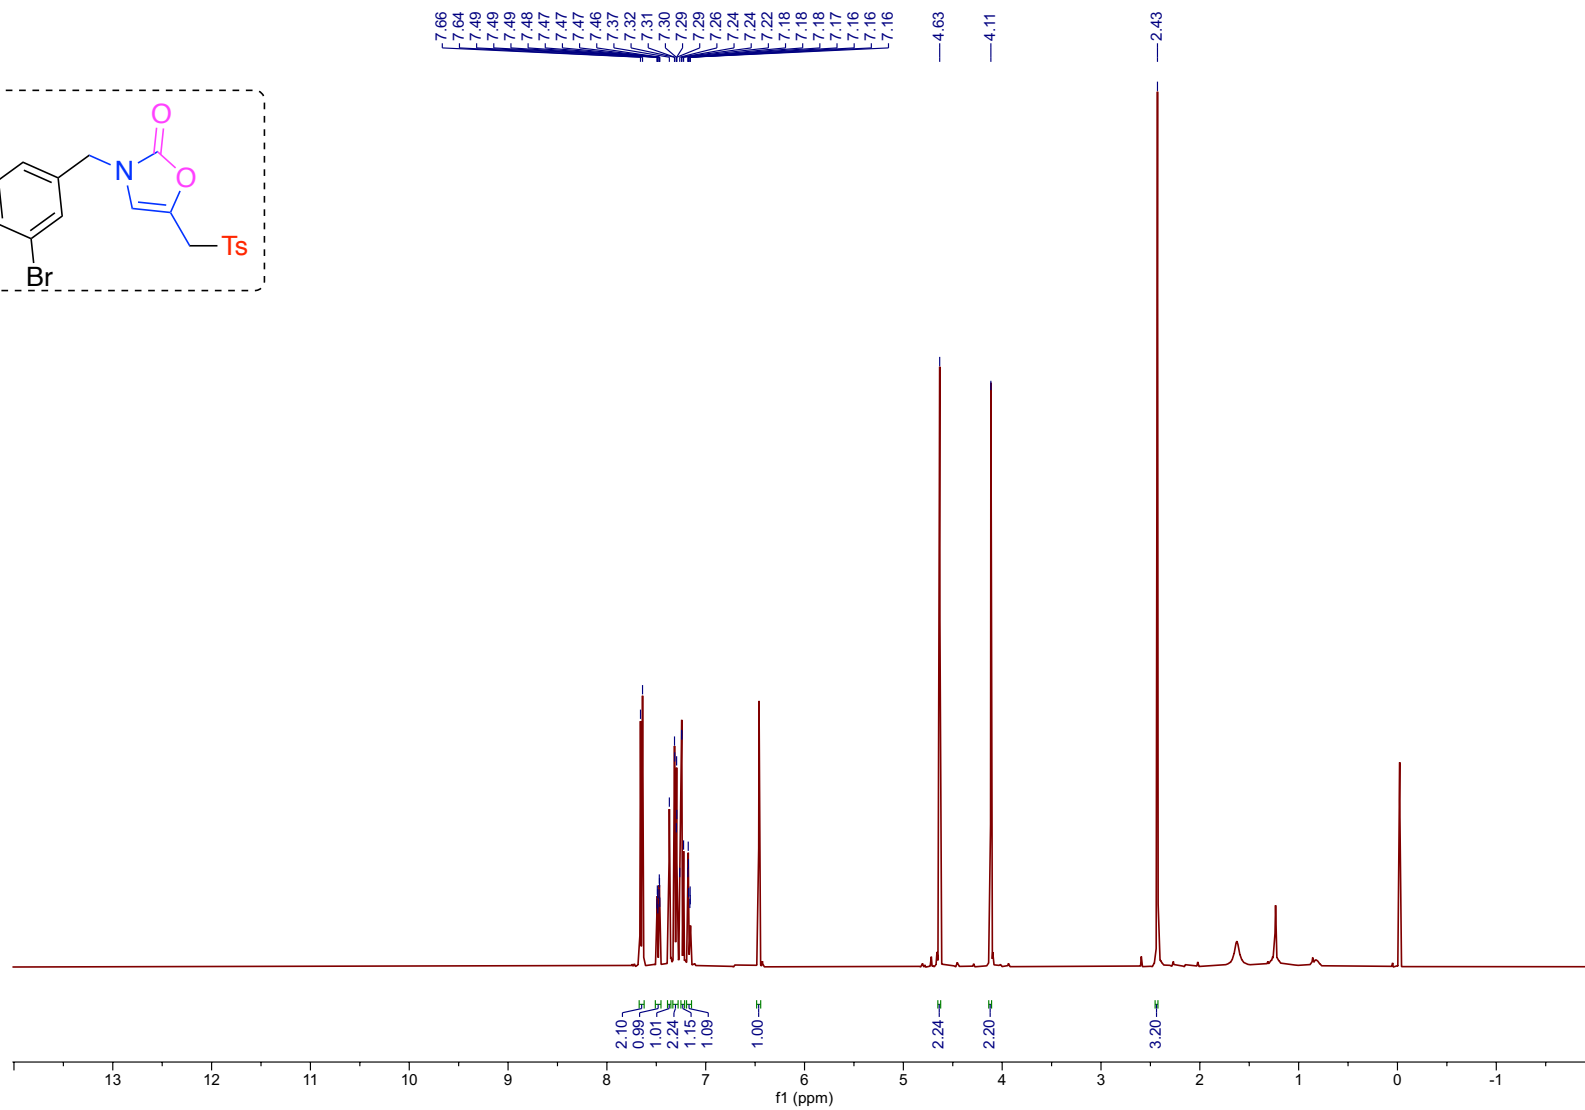

**$^1\text{H}$  (400 MHz) spectrum of compound 3j in  $\text{CDCl}_3$**

S37

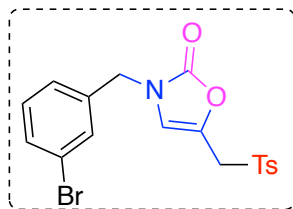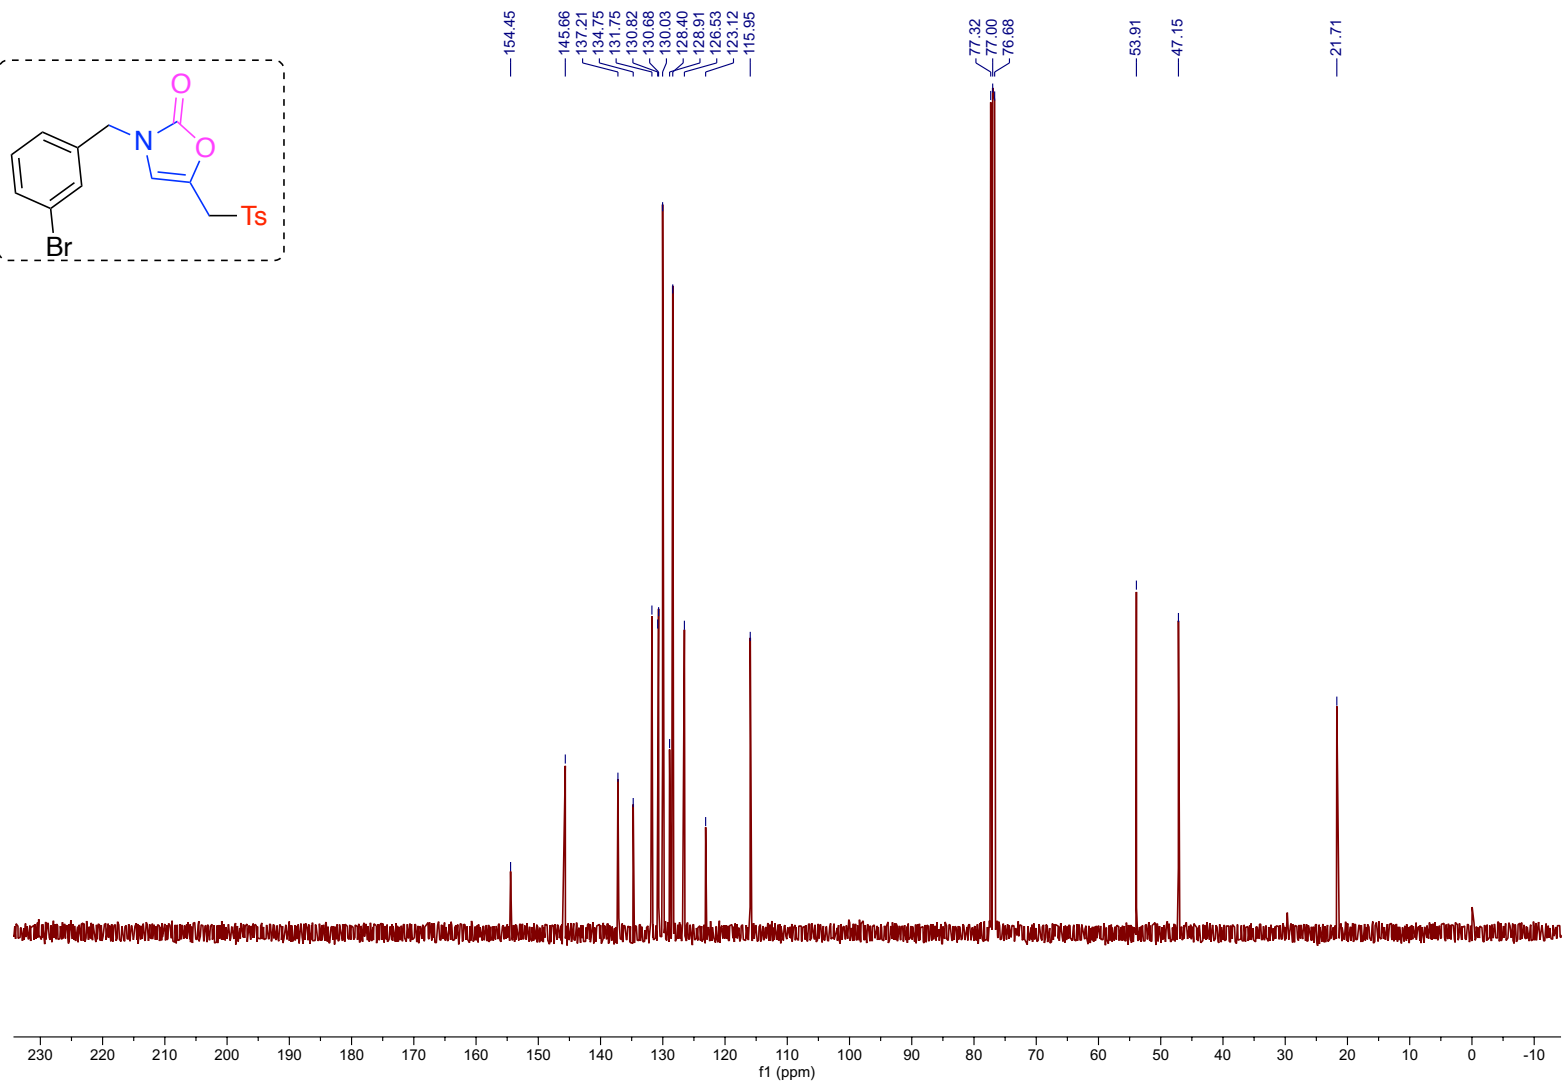

$^{13}\text{C}$  (101 MHz) spectrum of compound 3j in  $\text{CDCl}_3$

S38

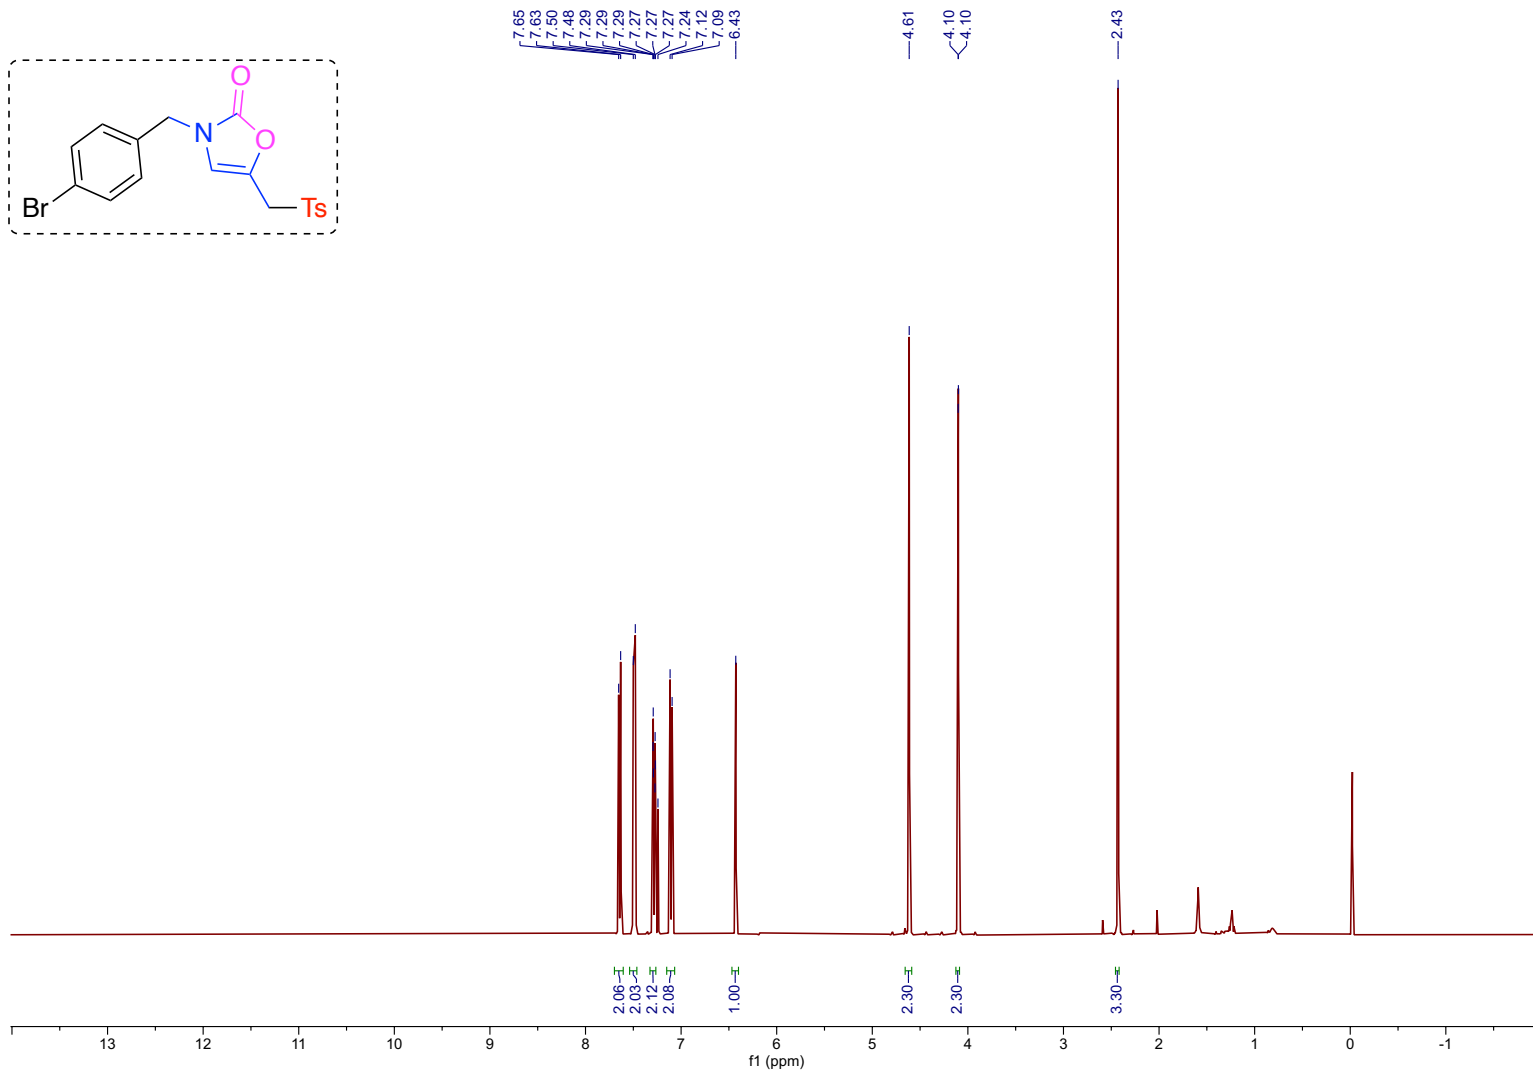

**<sup>1</sup>H (400 MHz) spectrum of compound 3k in CDCl<sub>3</sub>**

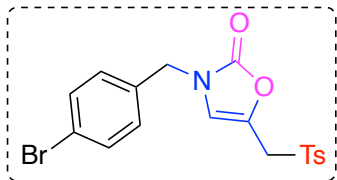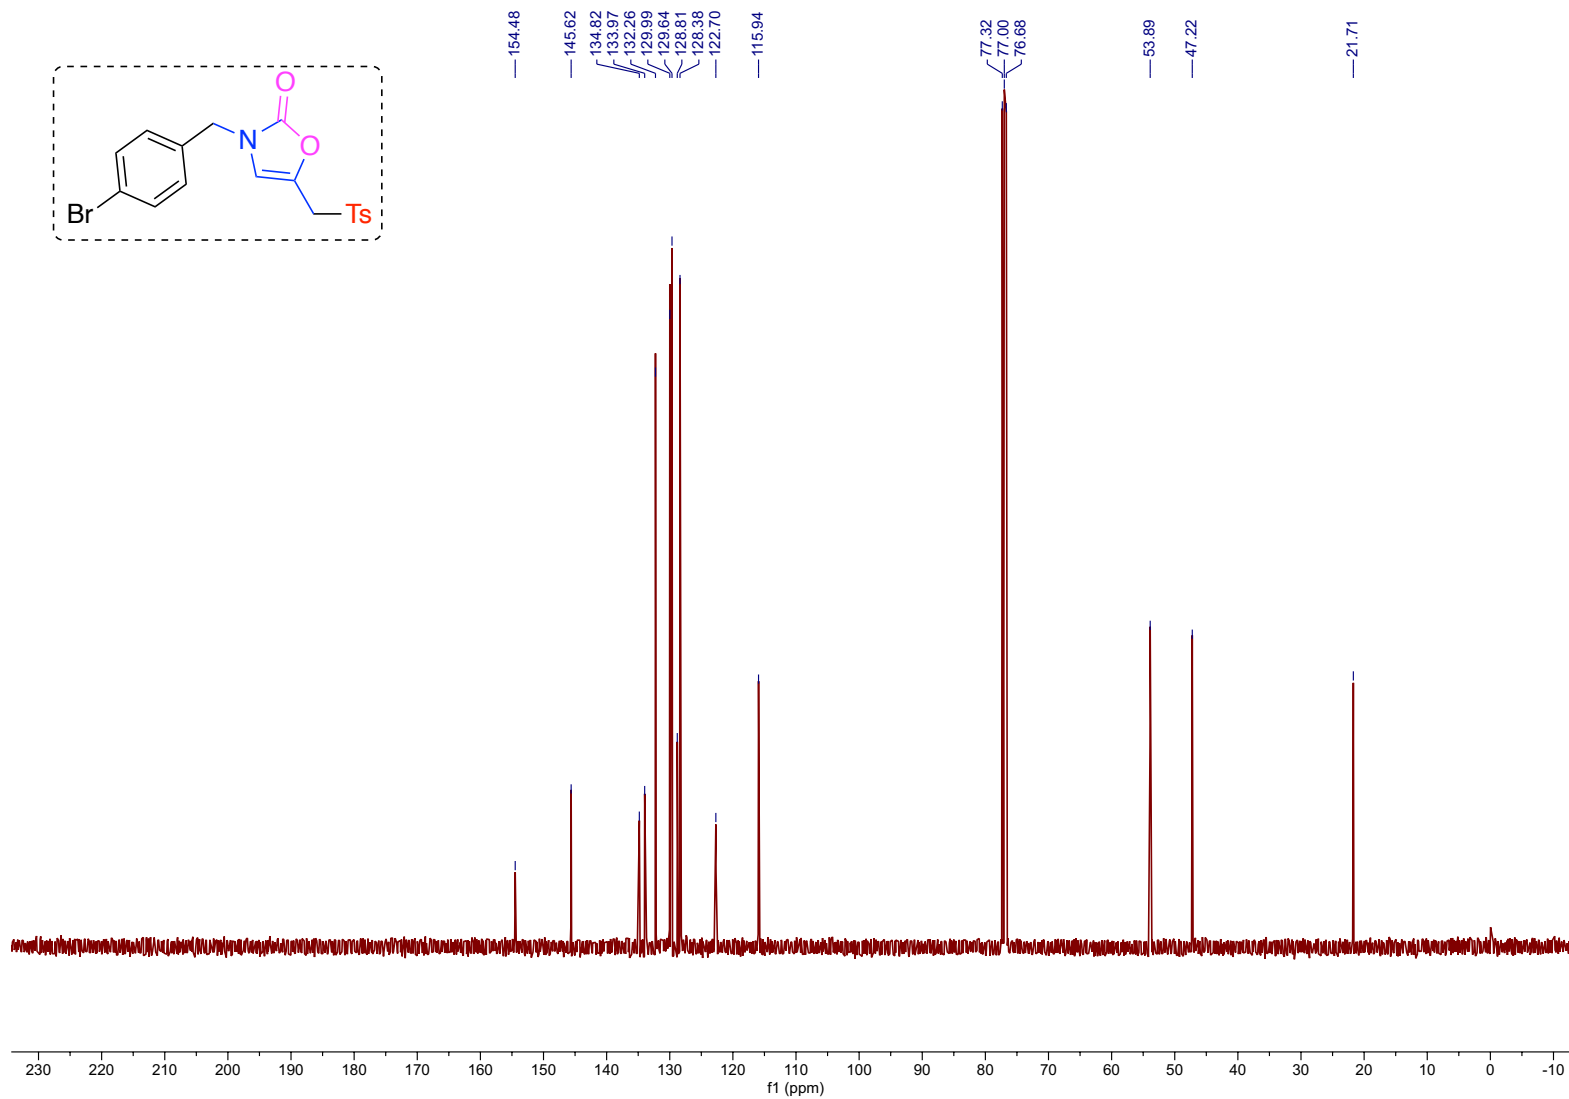

$^{13}\text{C}$  (101 MHz) spectrum of compound 3k in  $\text{CDCl}_3$

S40



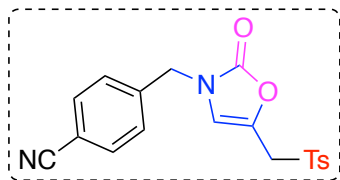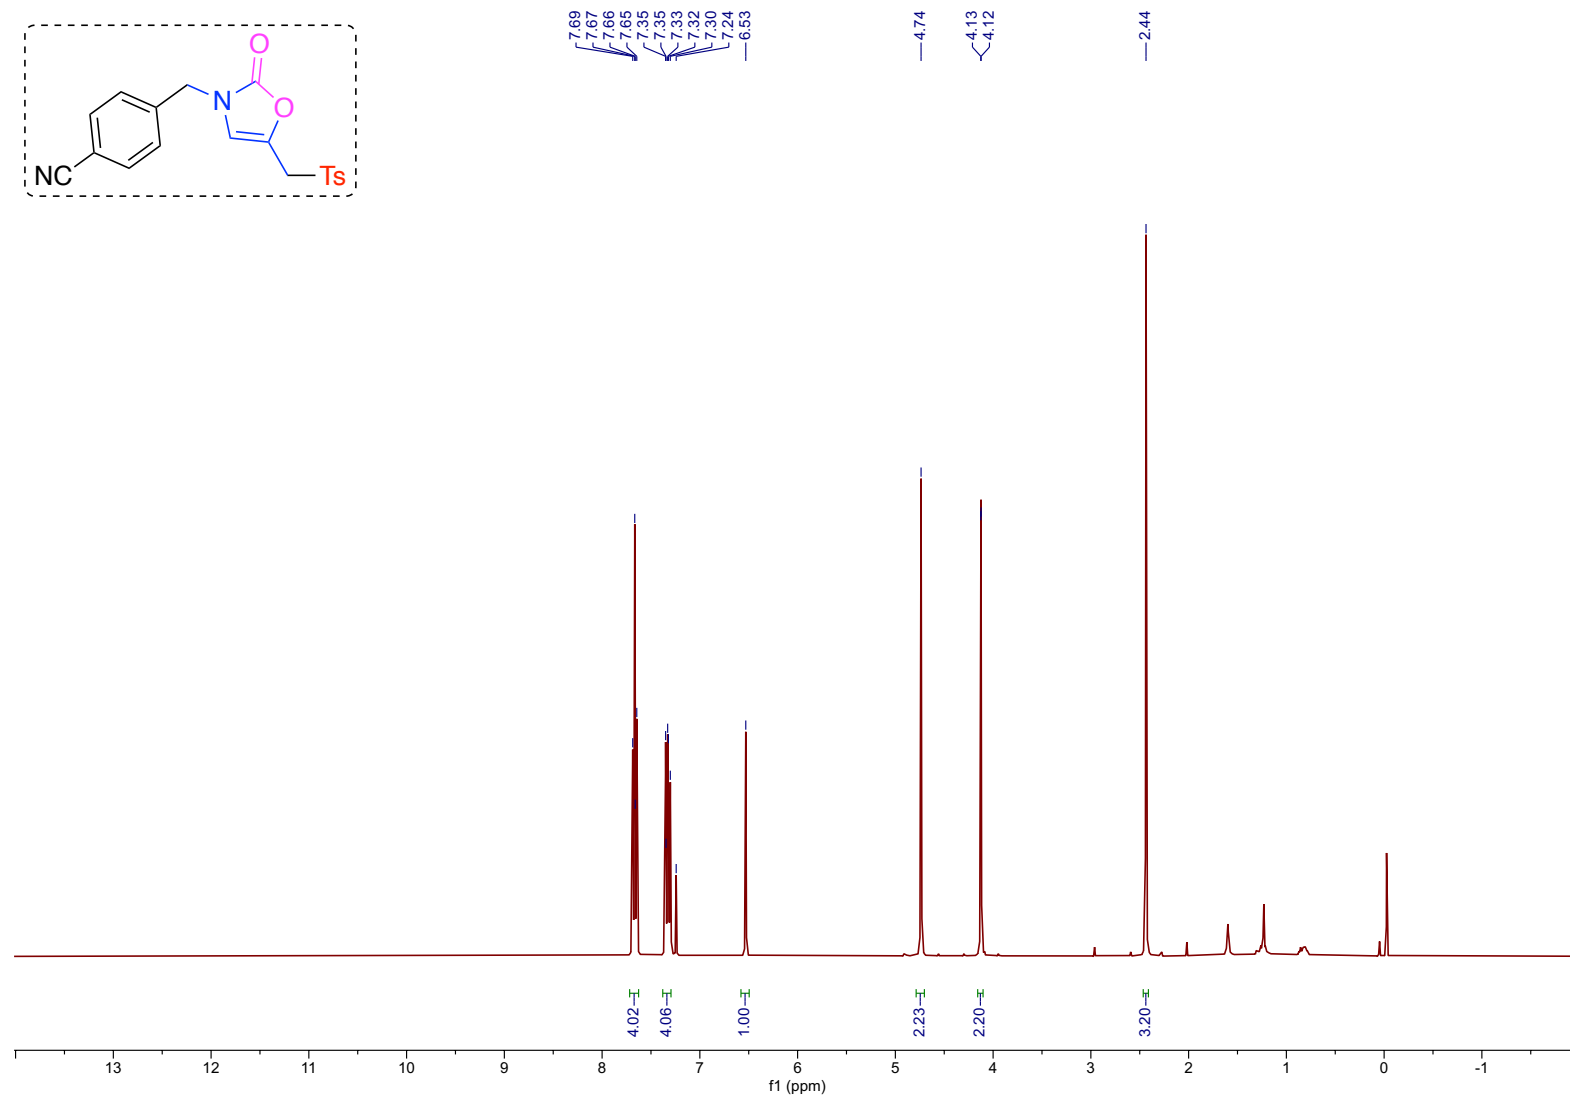

<sup>1</sup>H (400 MHz) spectrum of compound 31 in CDCl<sub>3</sub>

S41

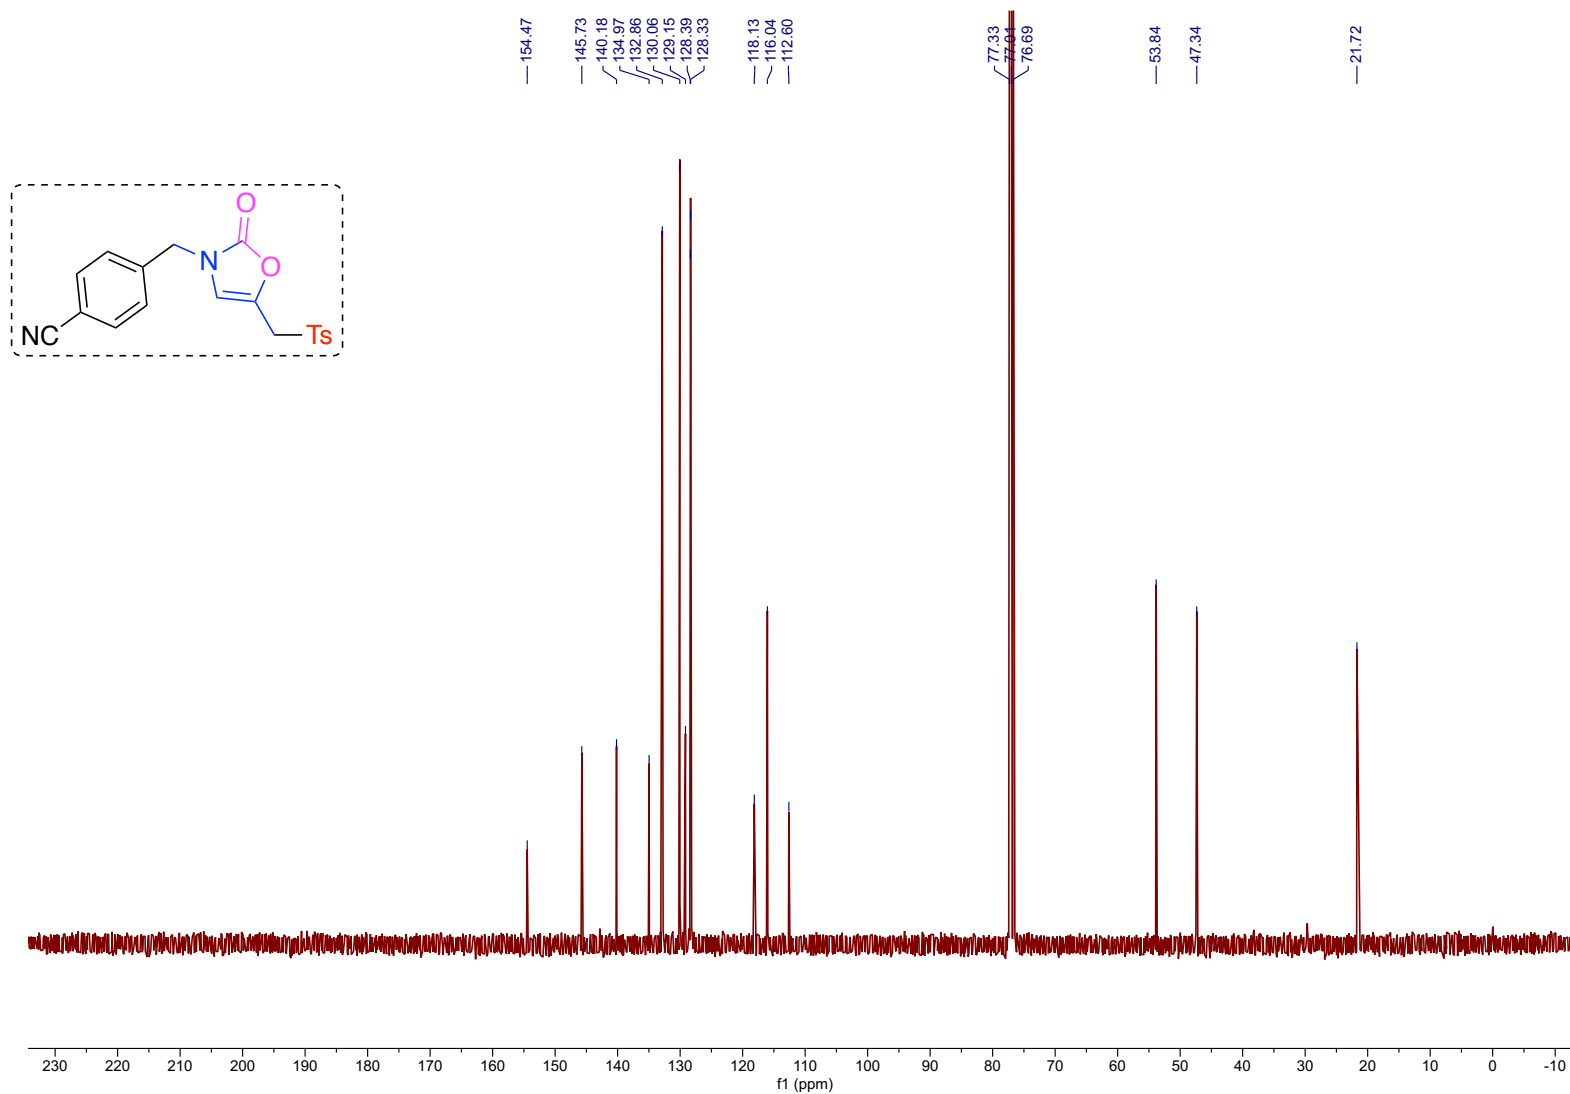

$^{13}\text{C}$  (101 MHz) spectrum of compound 3l in  $\text{CDCl}_3$

S42

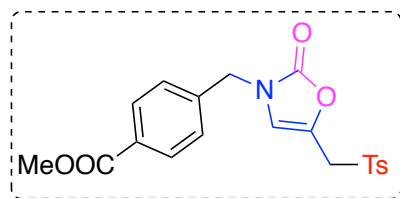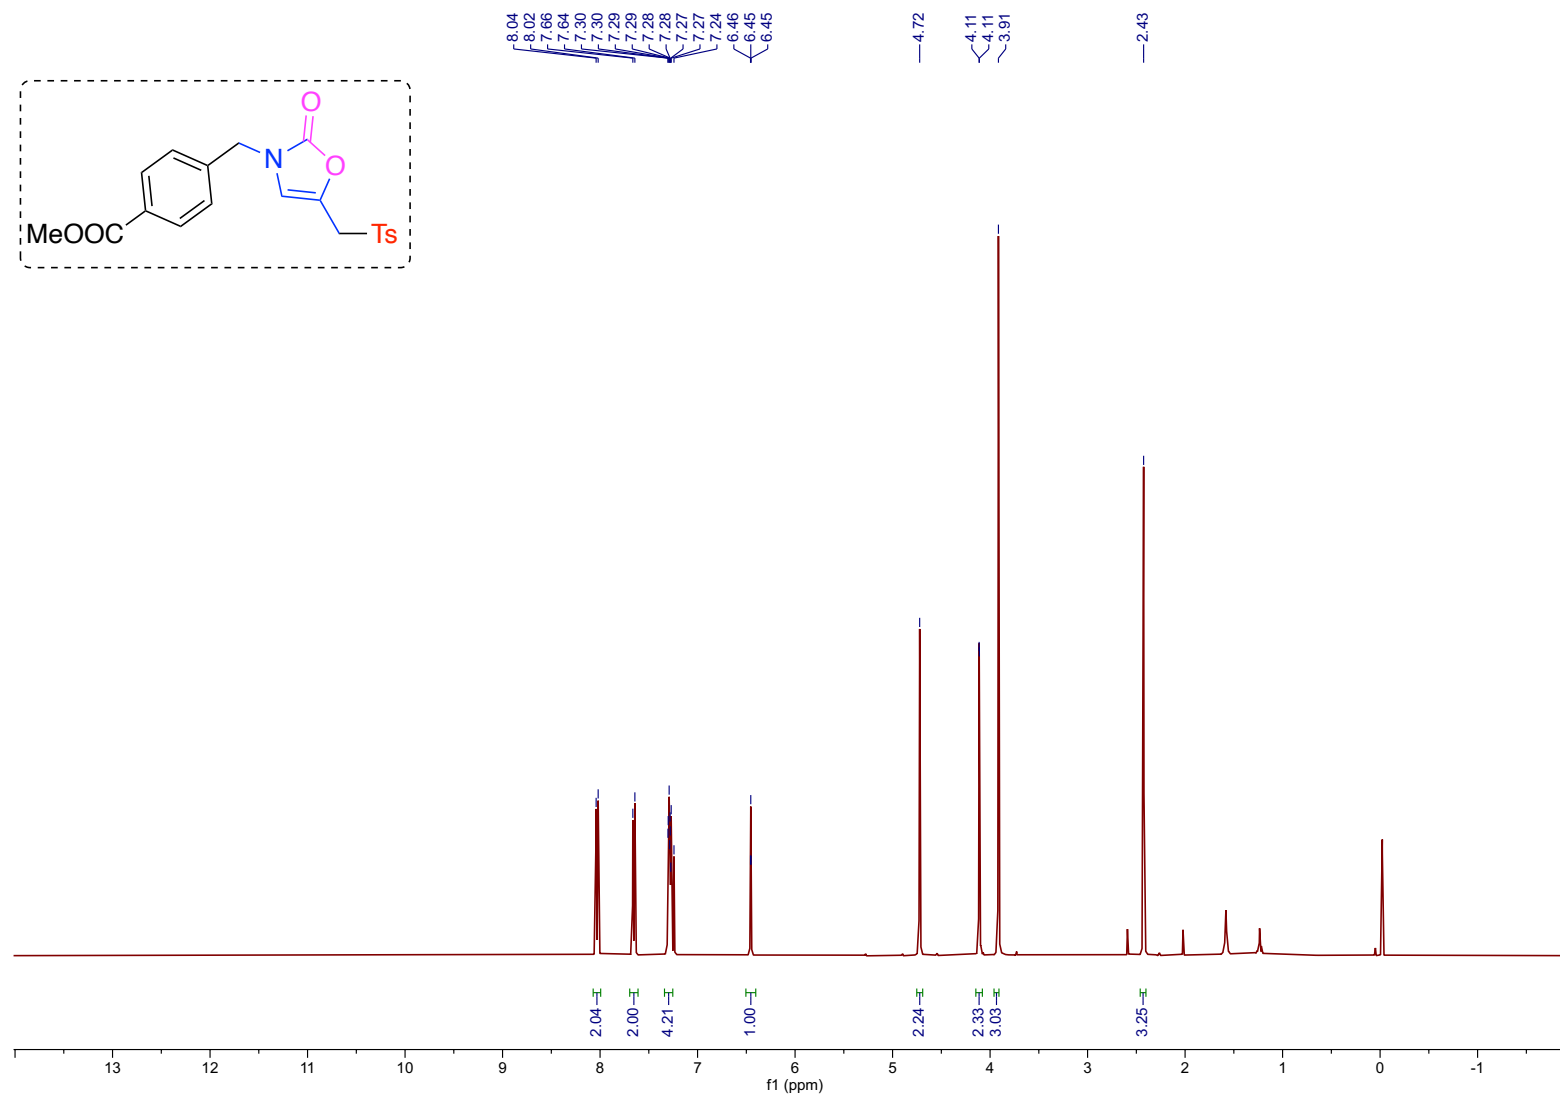

$^1\text{H}$  (400 MHz) spectrum of compound 3m in  $\text{CDCl}_3$

S43

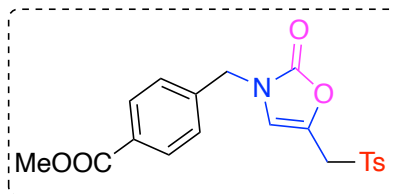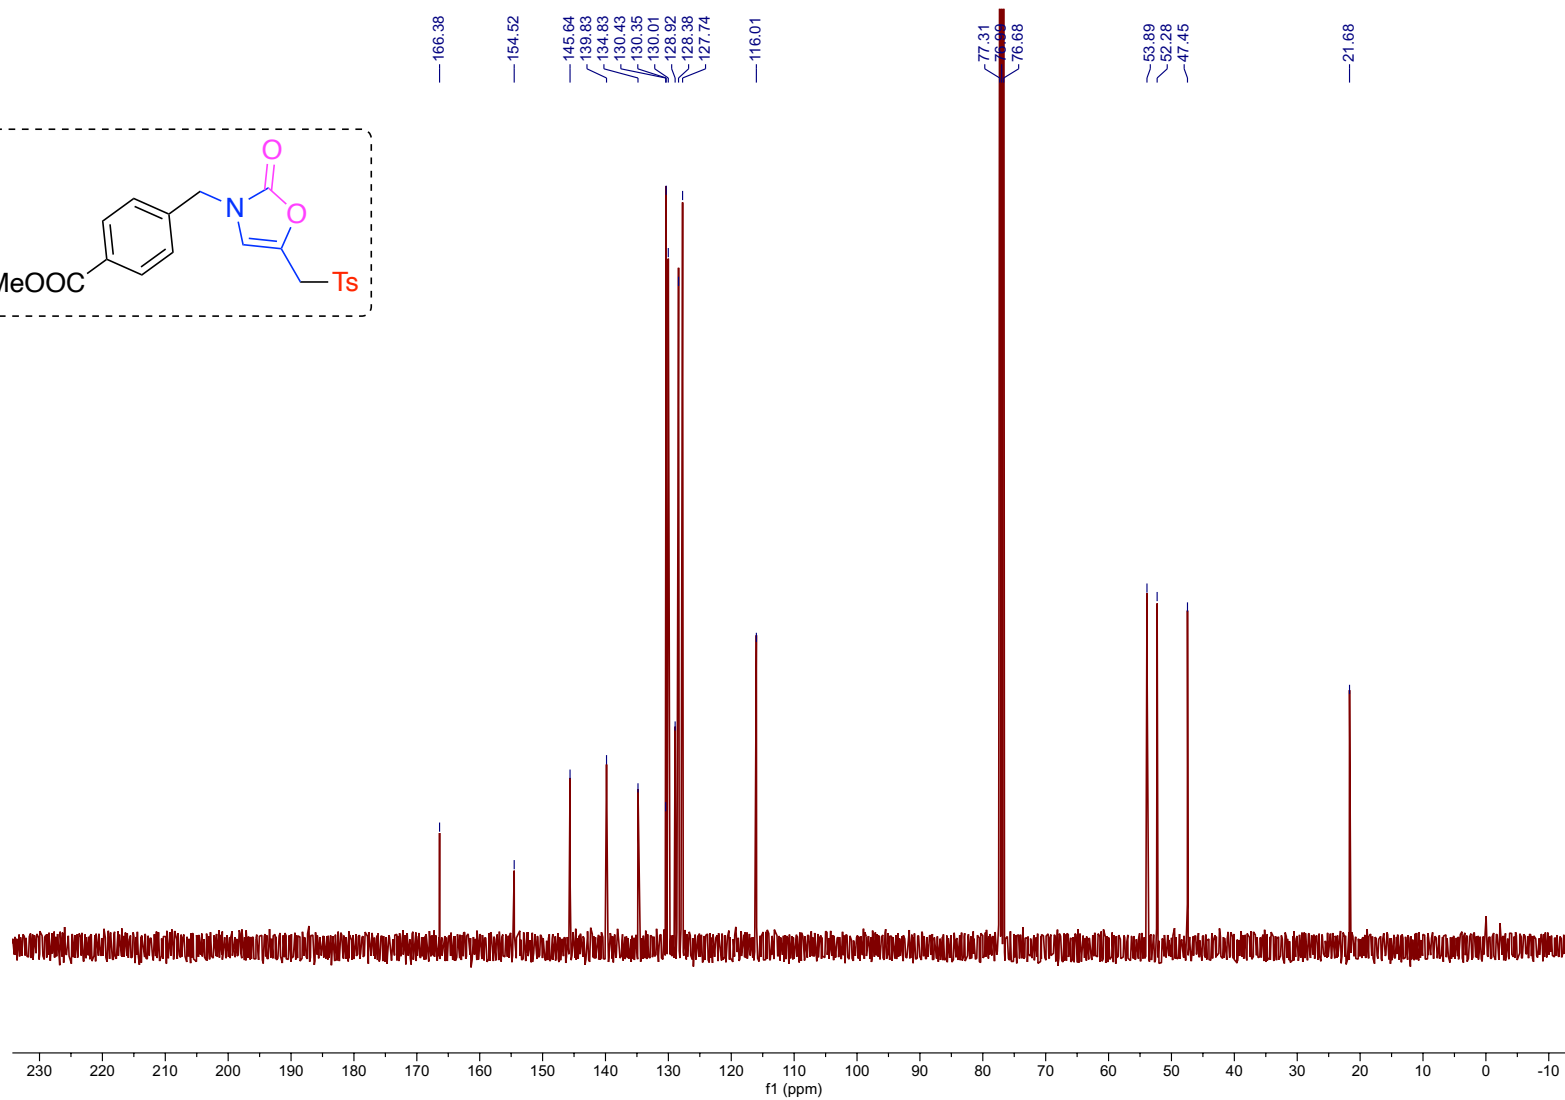

<sup>13</sup>C (101 MHz) spectrum of compound 3m in CDCl<sub>3</sub>

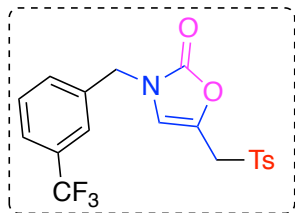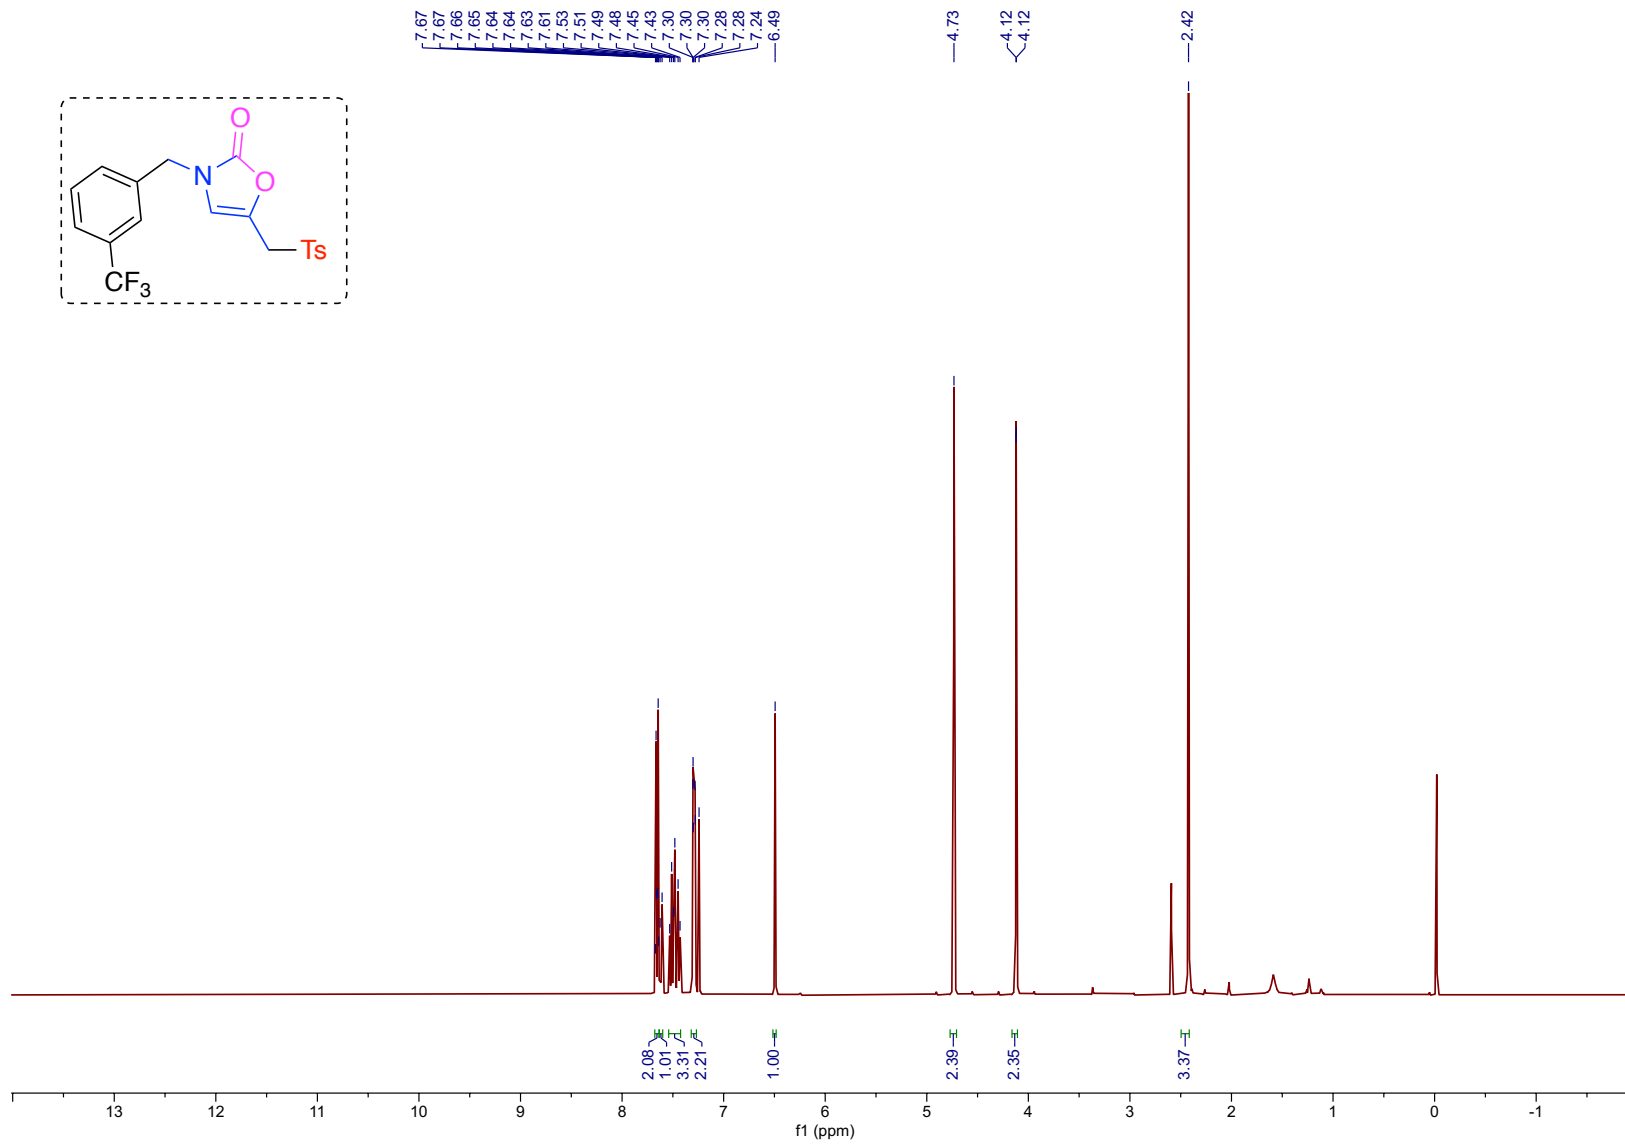

$^1\text{H}$  (400 MHz) spectrum of compound 3n in  $\text{CDCl}_3$

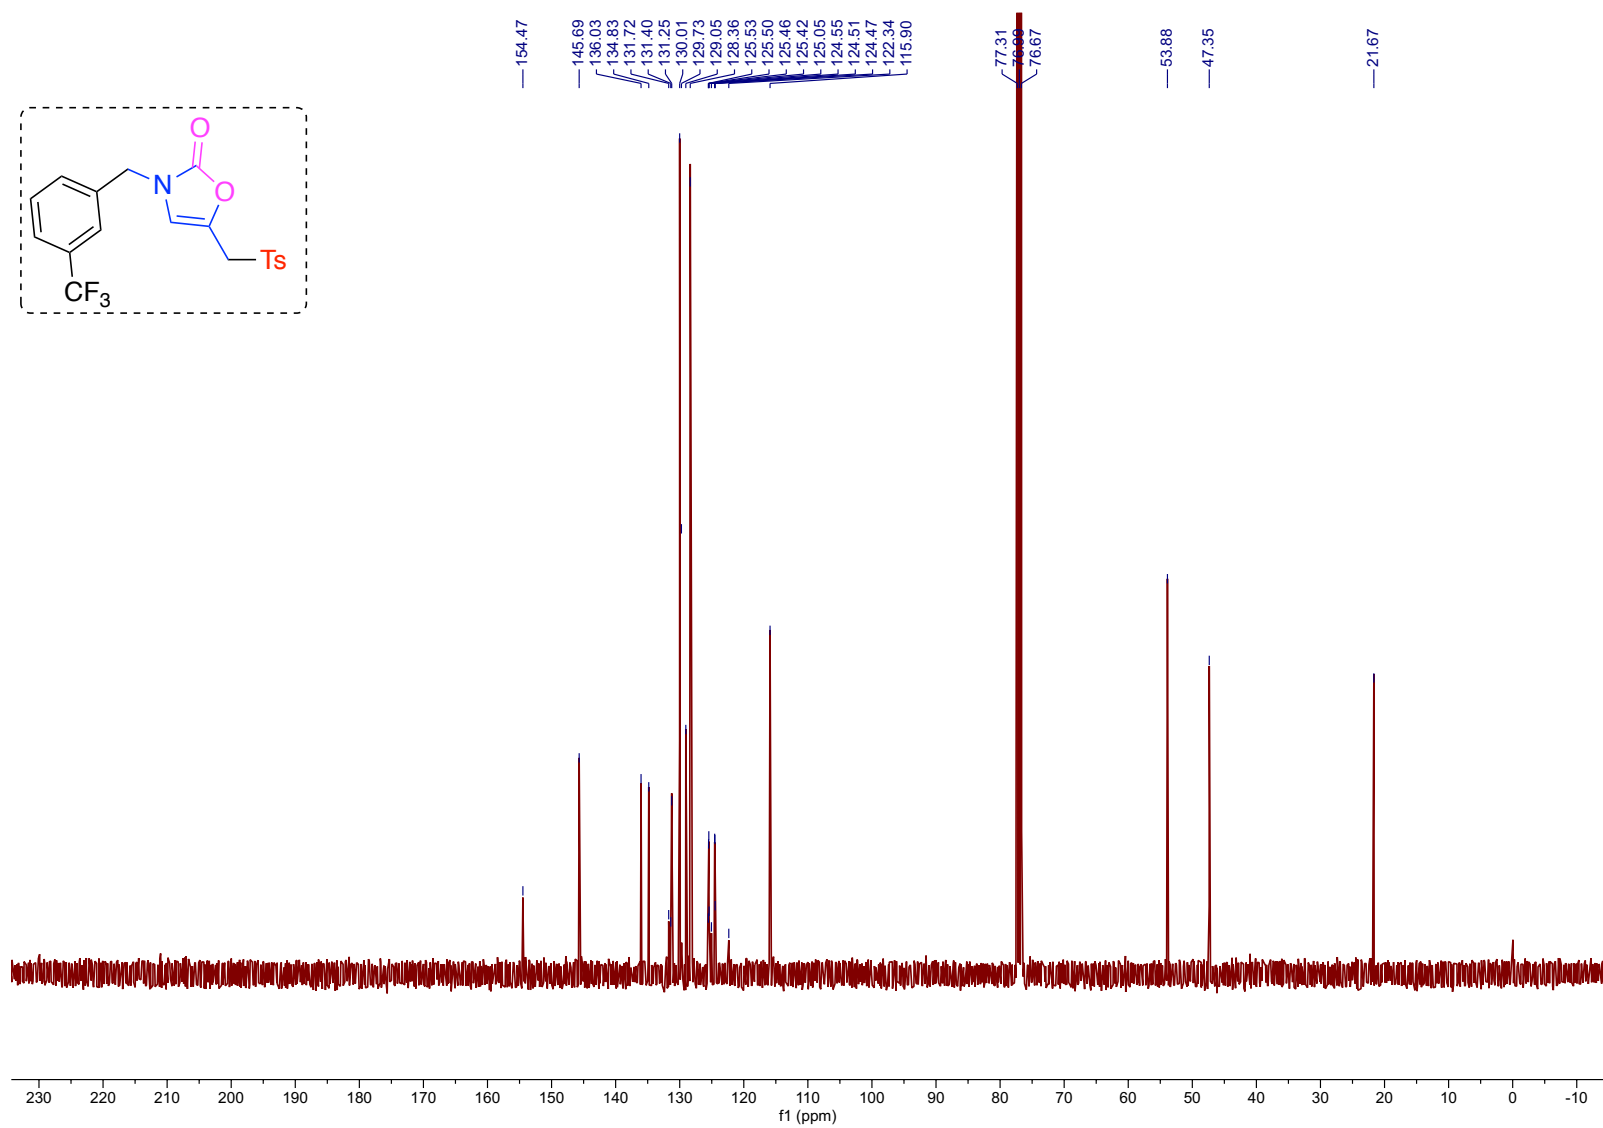

<sup>13</sup>C (101 MHz) spectrum of compound 3n in CDCl<sub>3</sub>

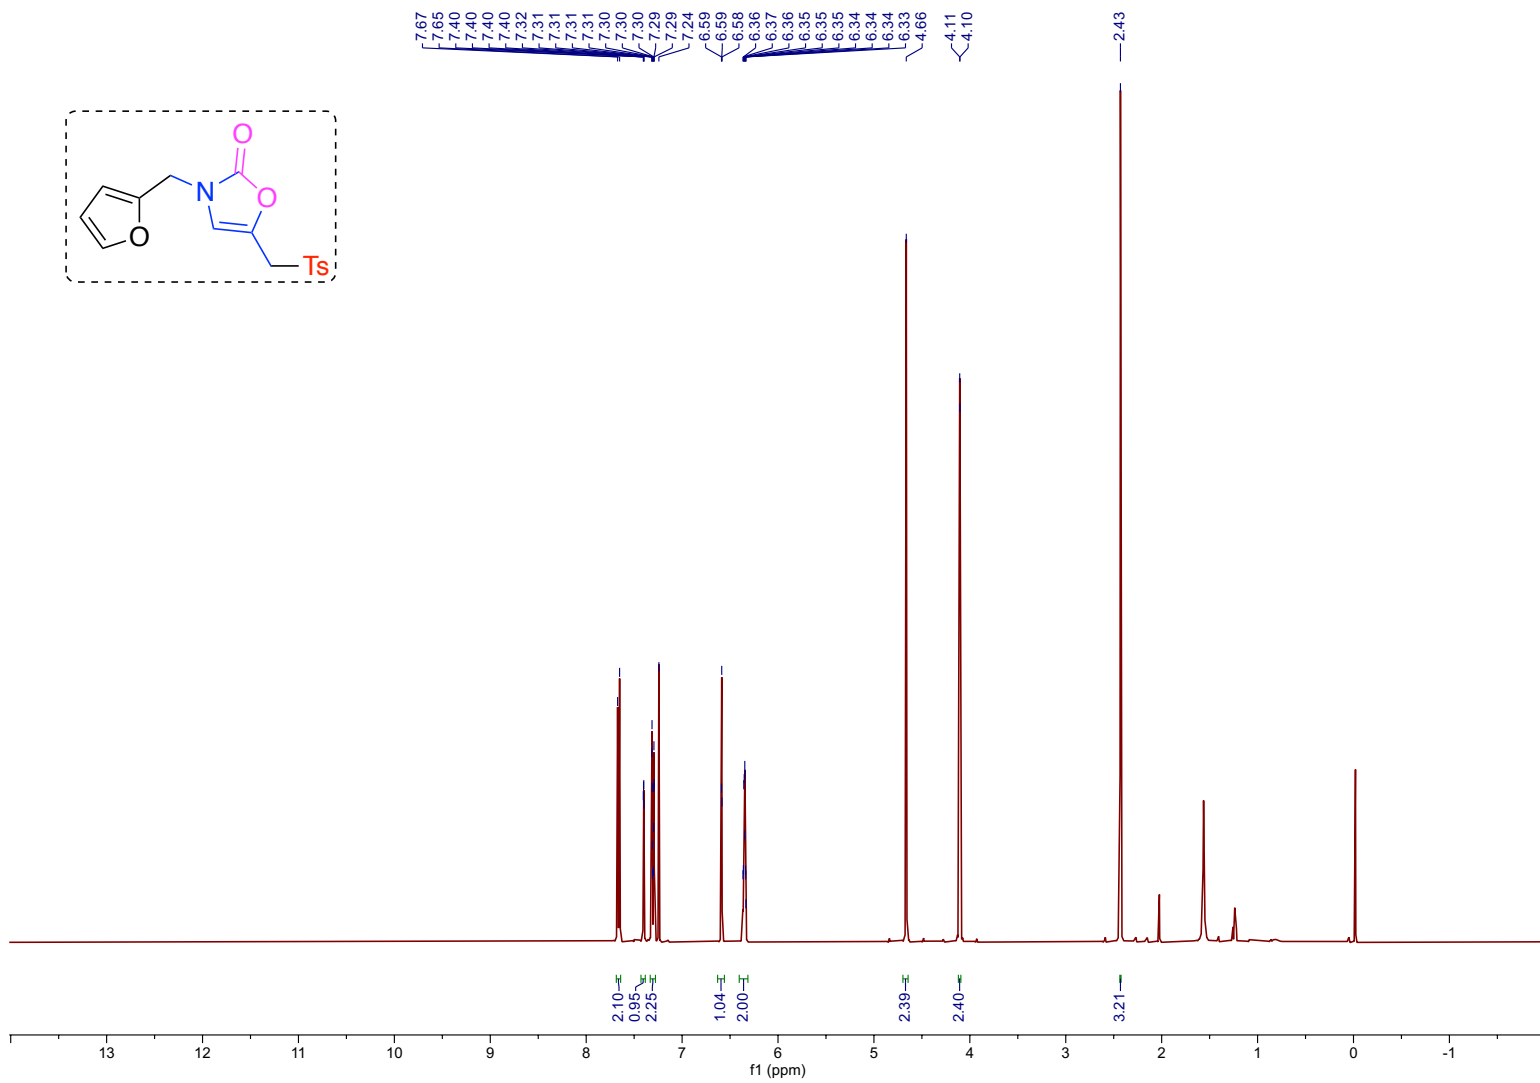

$^1\text{H}$  (400 MHz) spectrum of compound 3o in  $\text{CDCl}_3$

S47

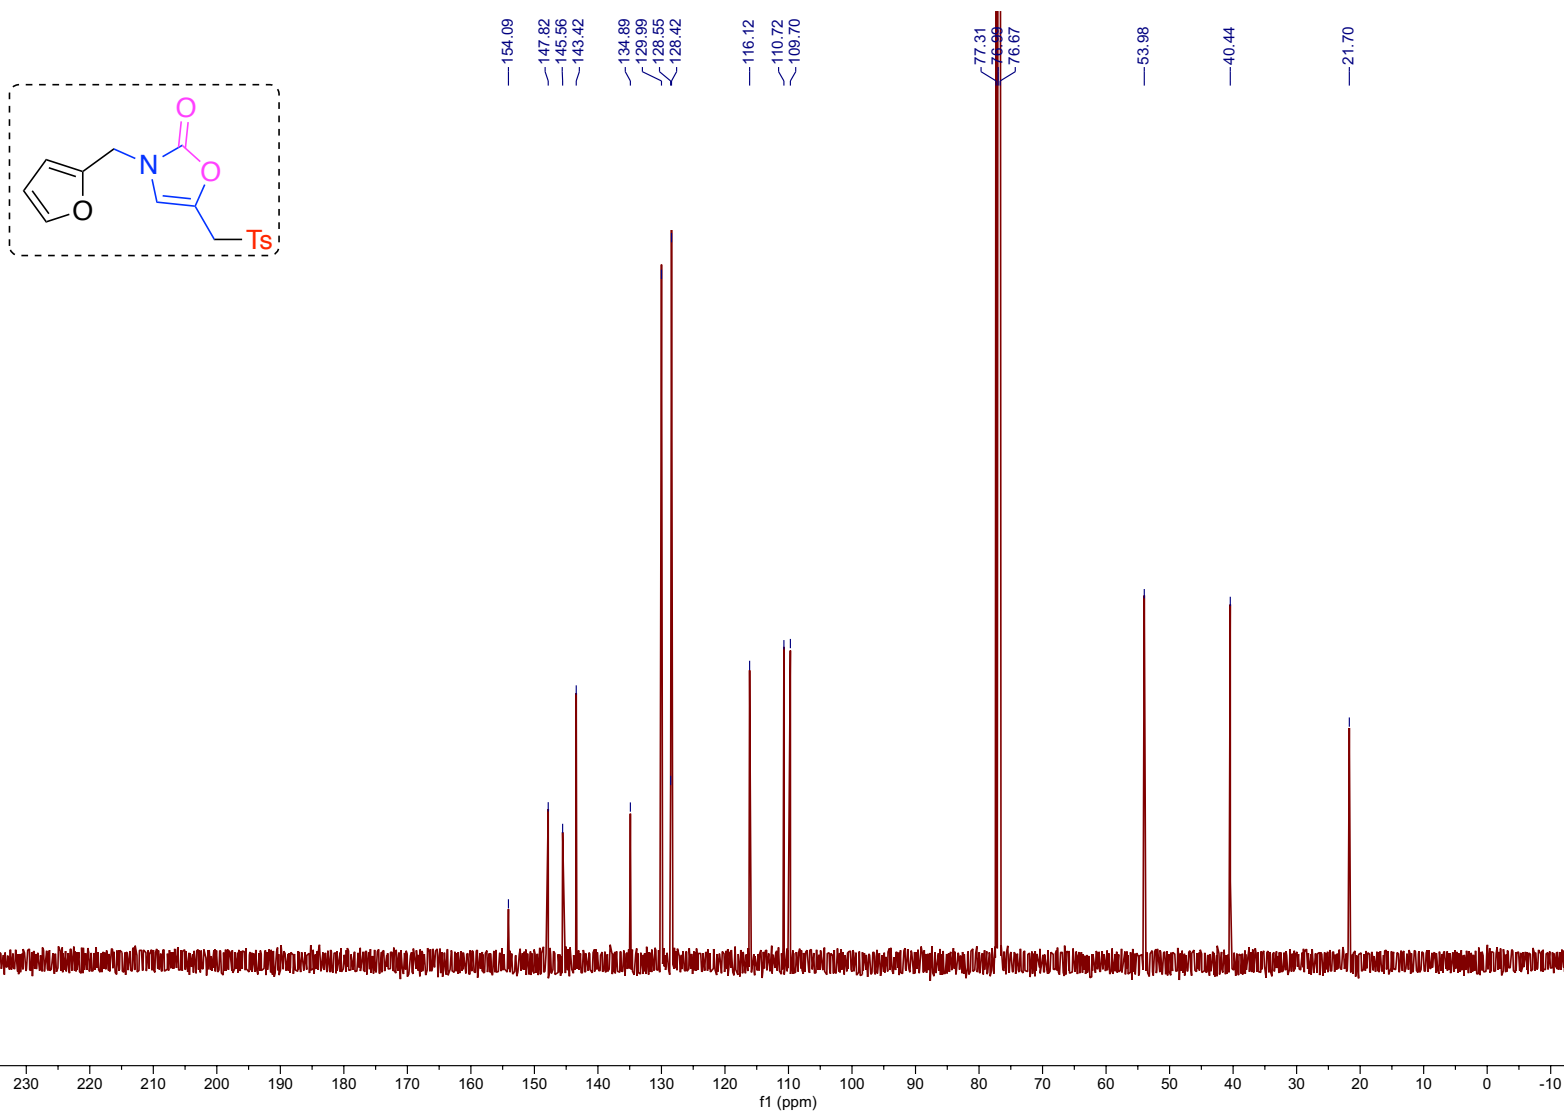

$^{13}\text{C}$  (101 MHz) spectrum of compound 3o in  $\text{CDCl}_3$



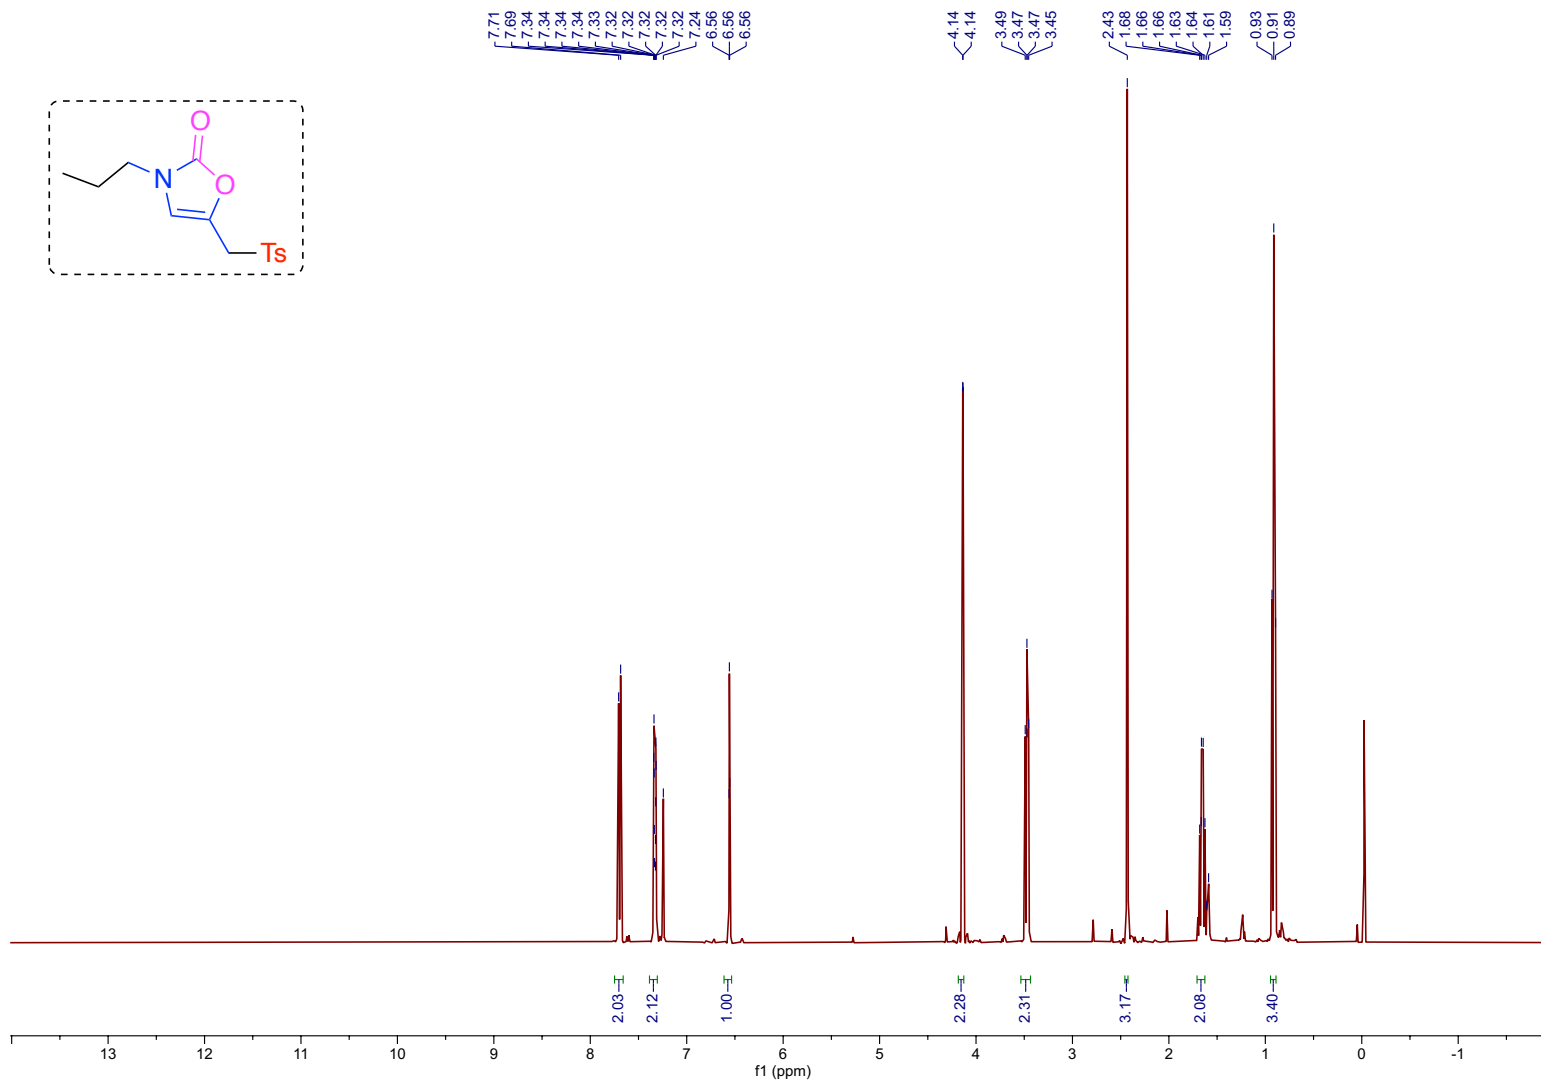

$^1\text{H}$  (400 MHz) spectrum of compound 3p in  $\text{CDCl}_3$

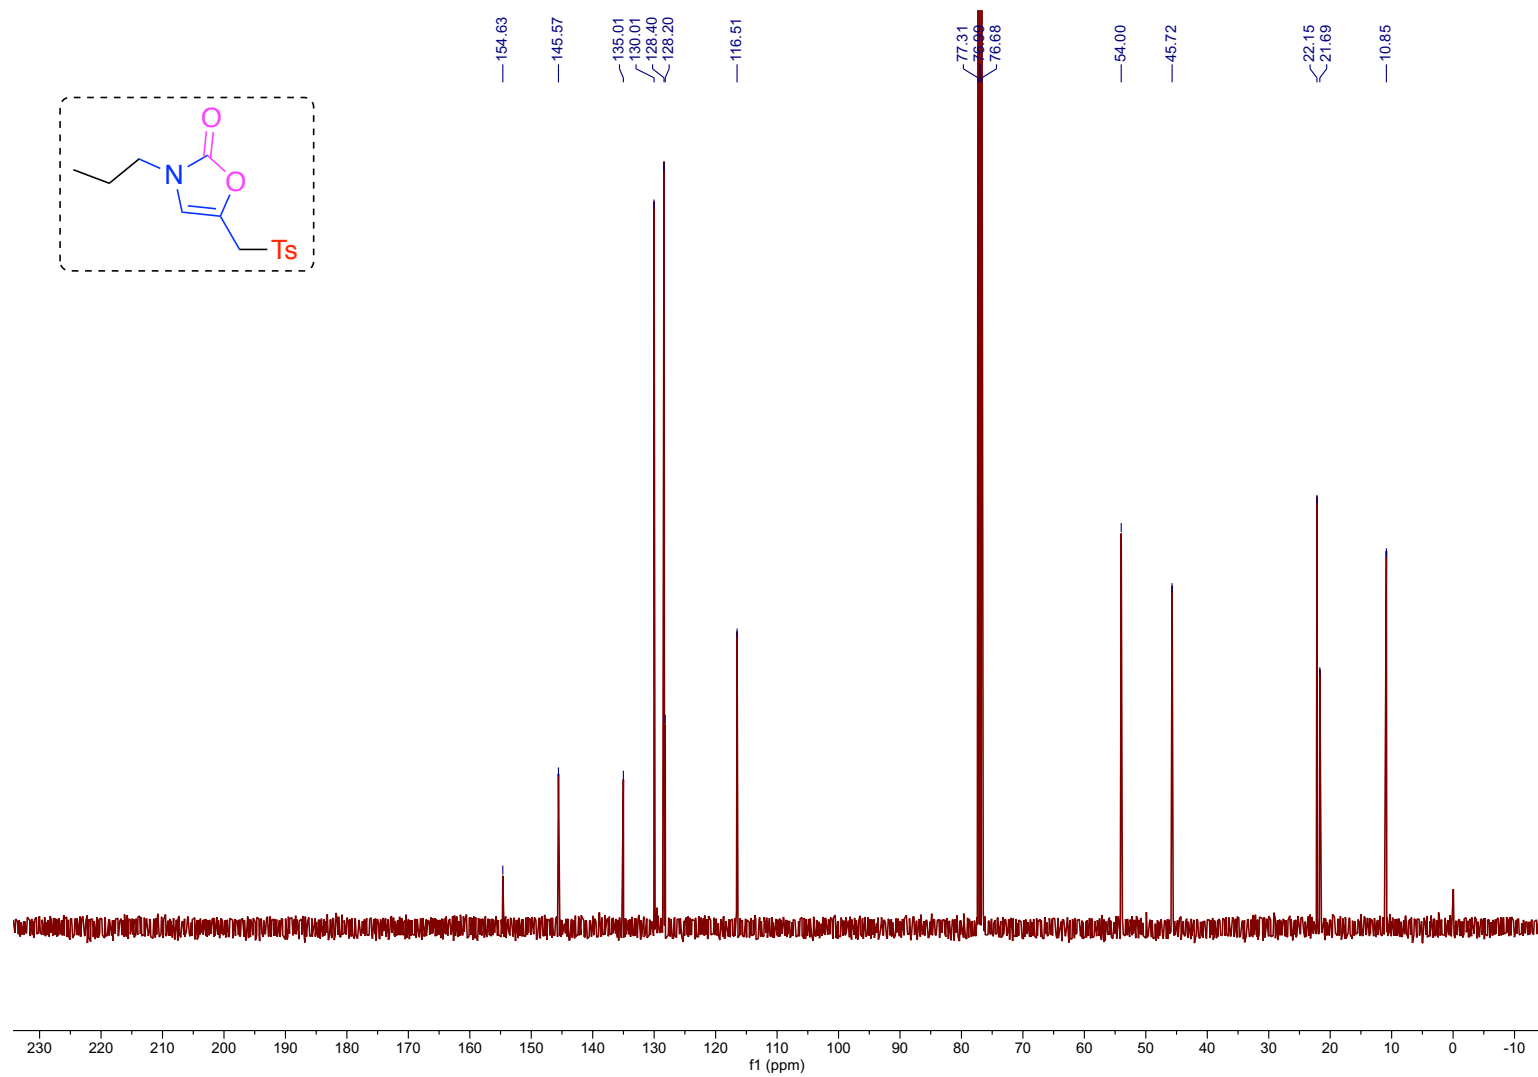

$^{13}\text{C}$  (101 MHz) spectrum of compound 3p in  $\text{CDCl}_3$

S50

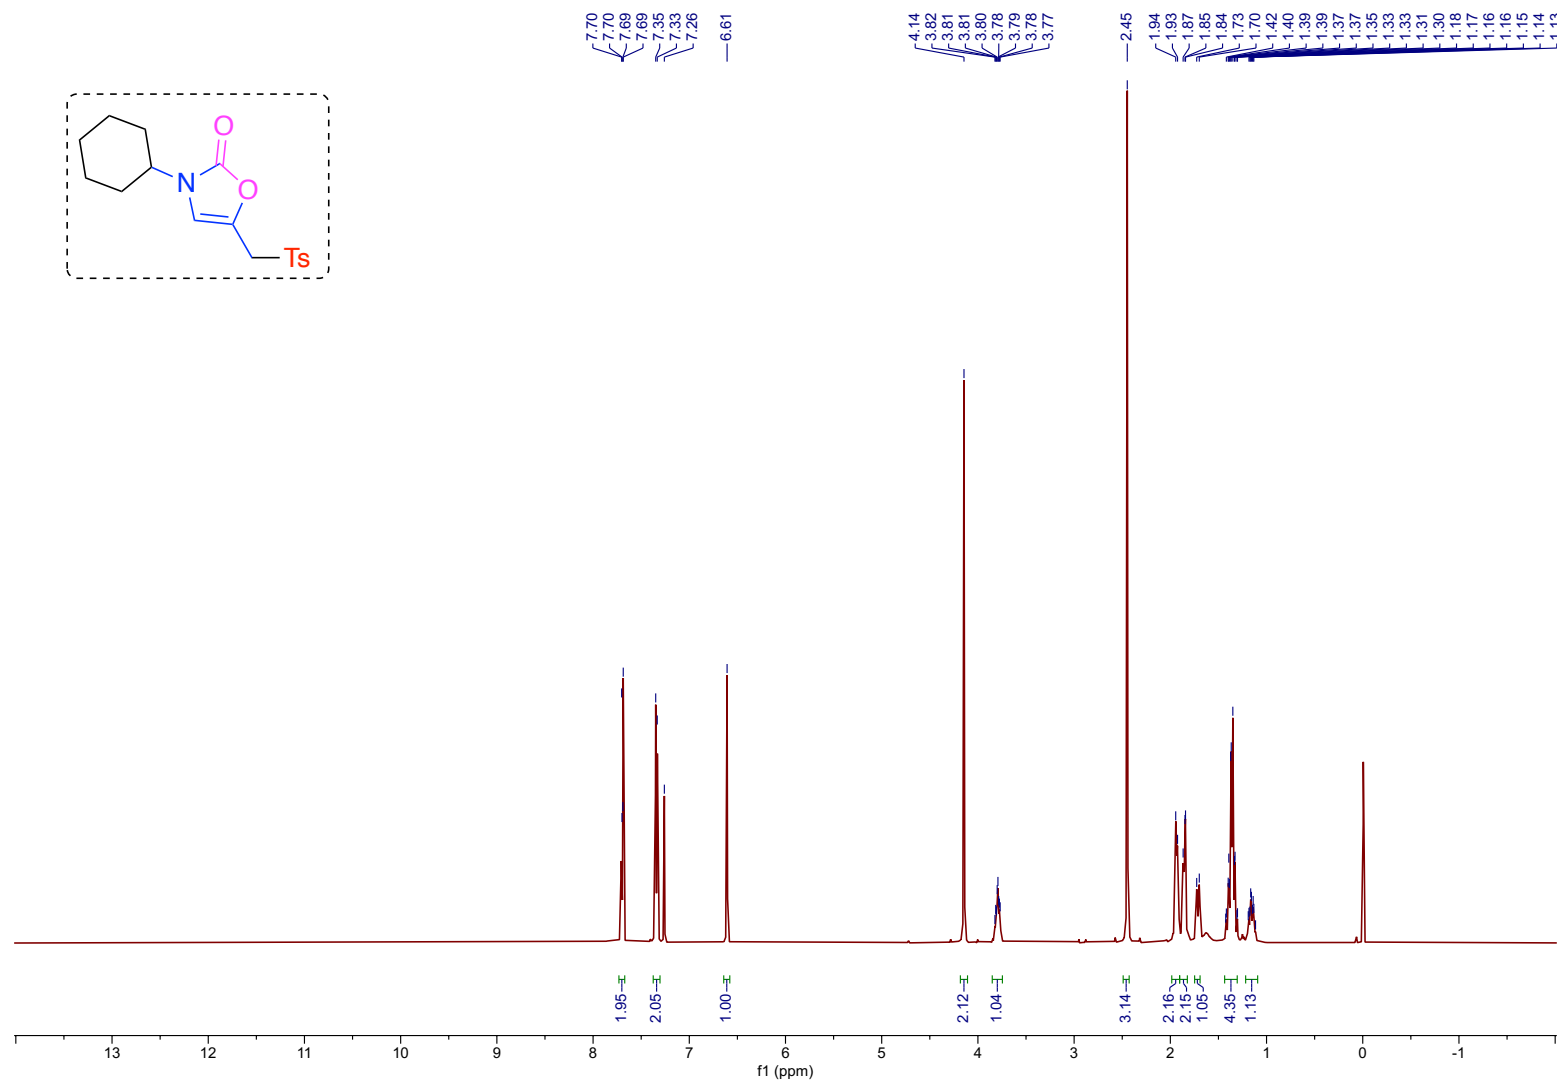

$^1\text{H}$  (500 MHz) spectrum of compound 3q in  $\text{CDCl}_3$

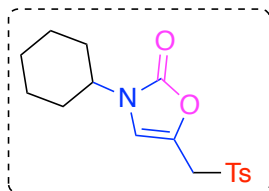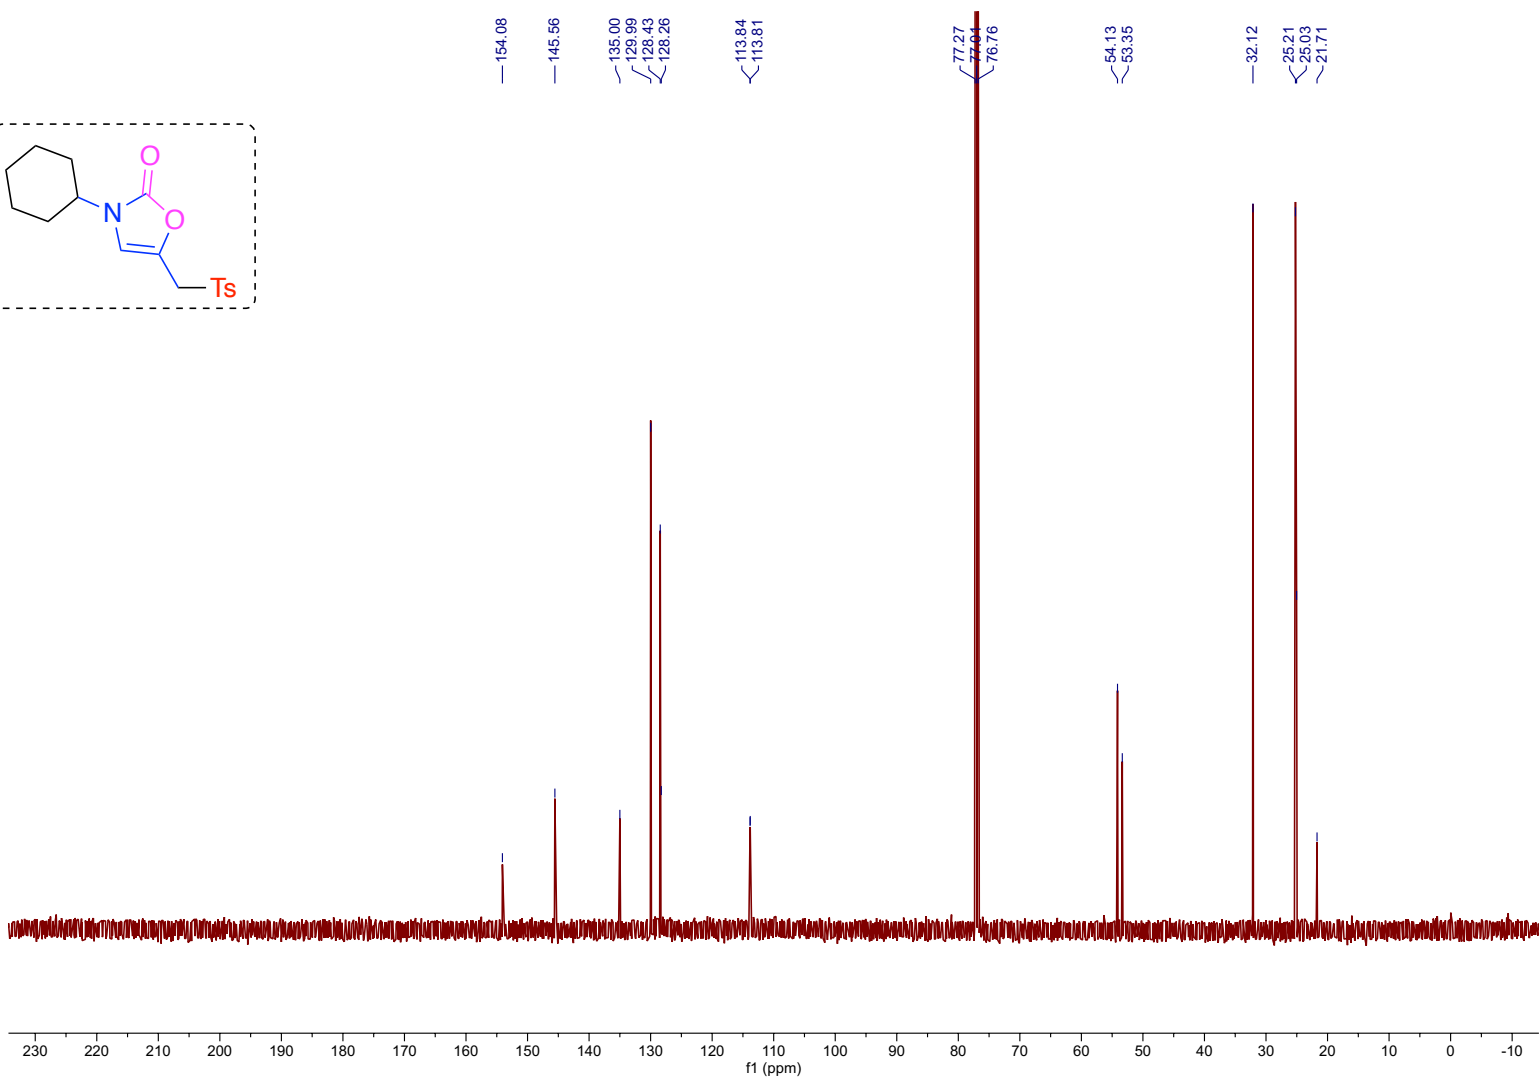

$^{13}\text{C}$  (126 MHz) spectrum of compound 3q in  $\text{CDCl}_3$

S52

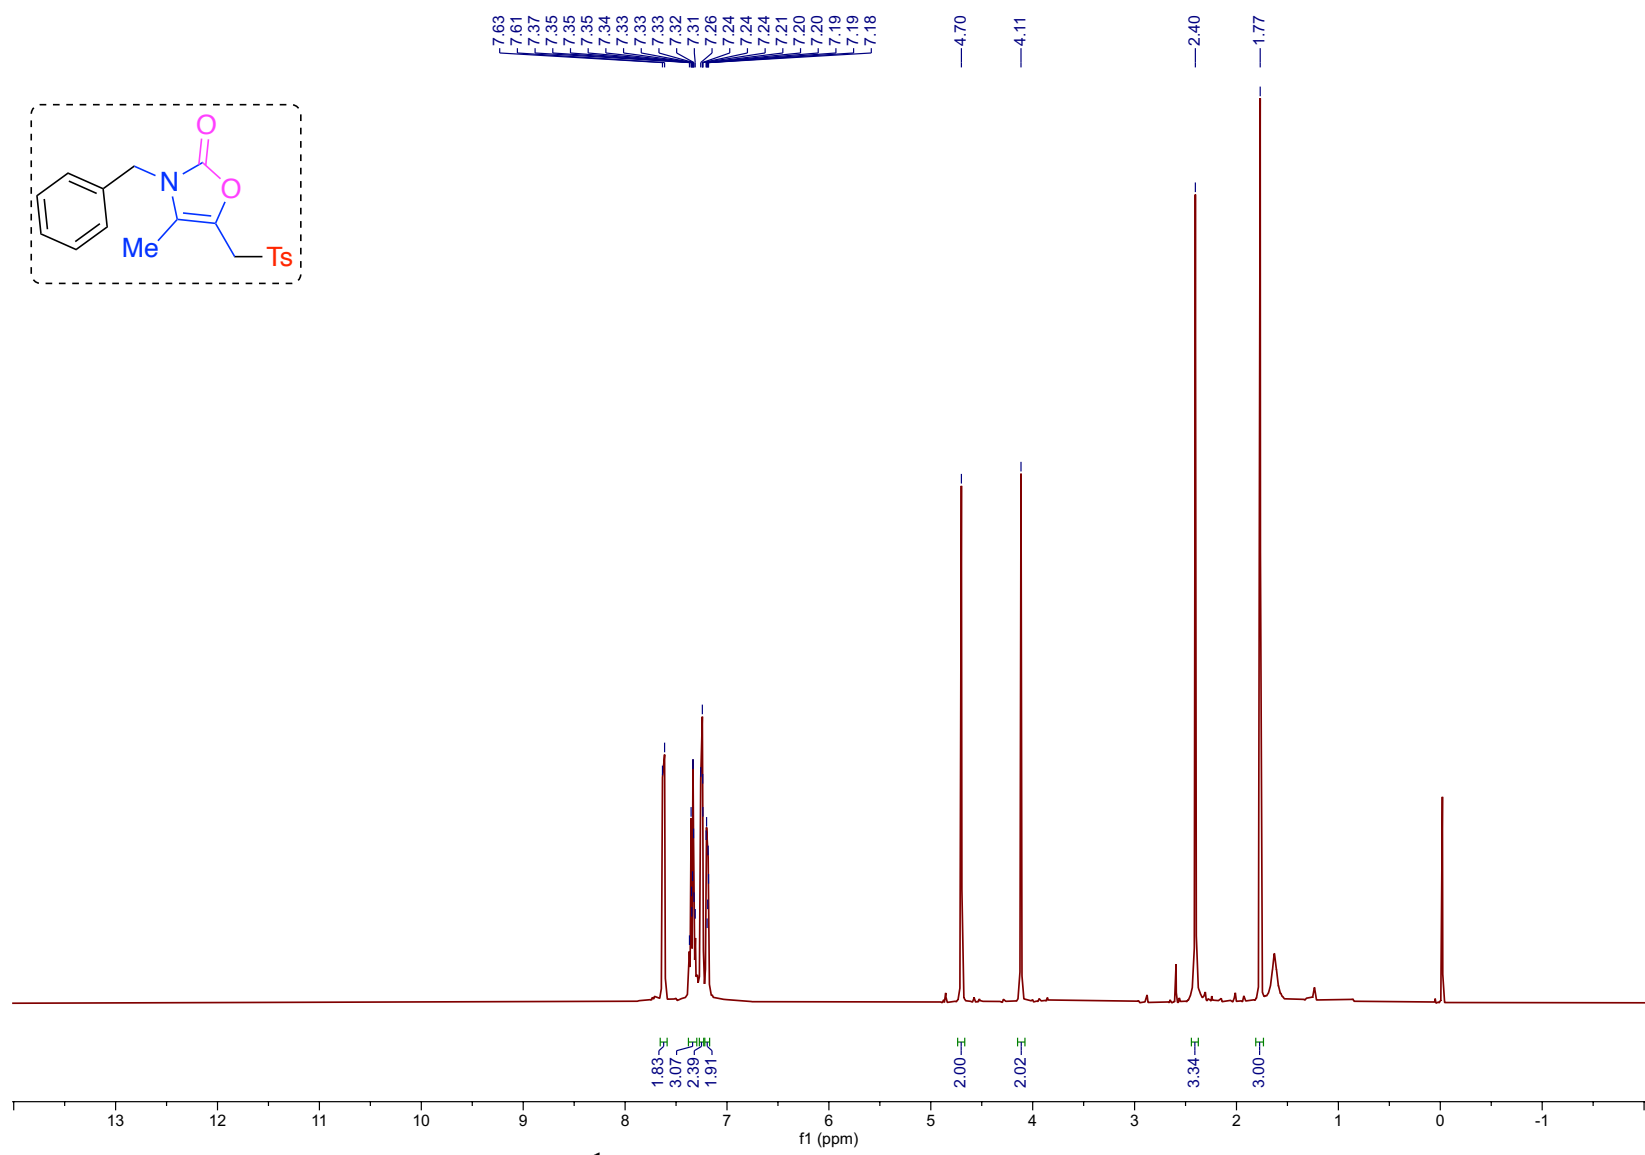

$^1\text{H}$  (400 MHz) spectrum of compound 3u in  $\text{CDCl}_3$

S53

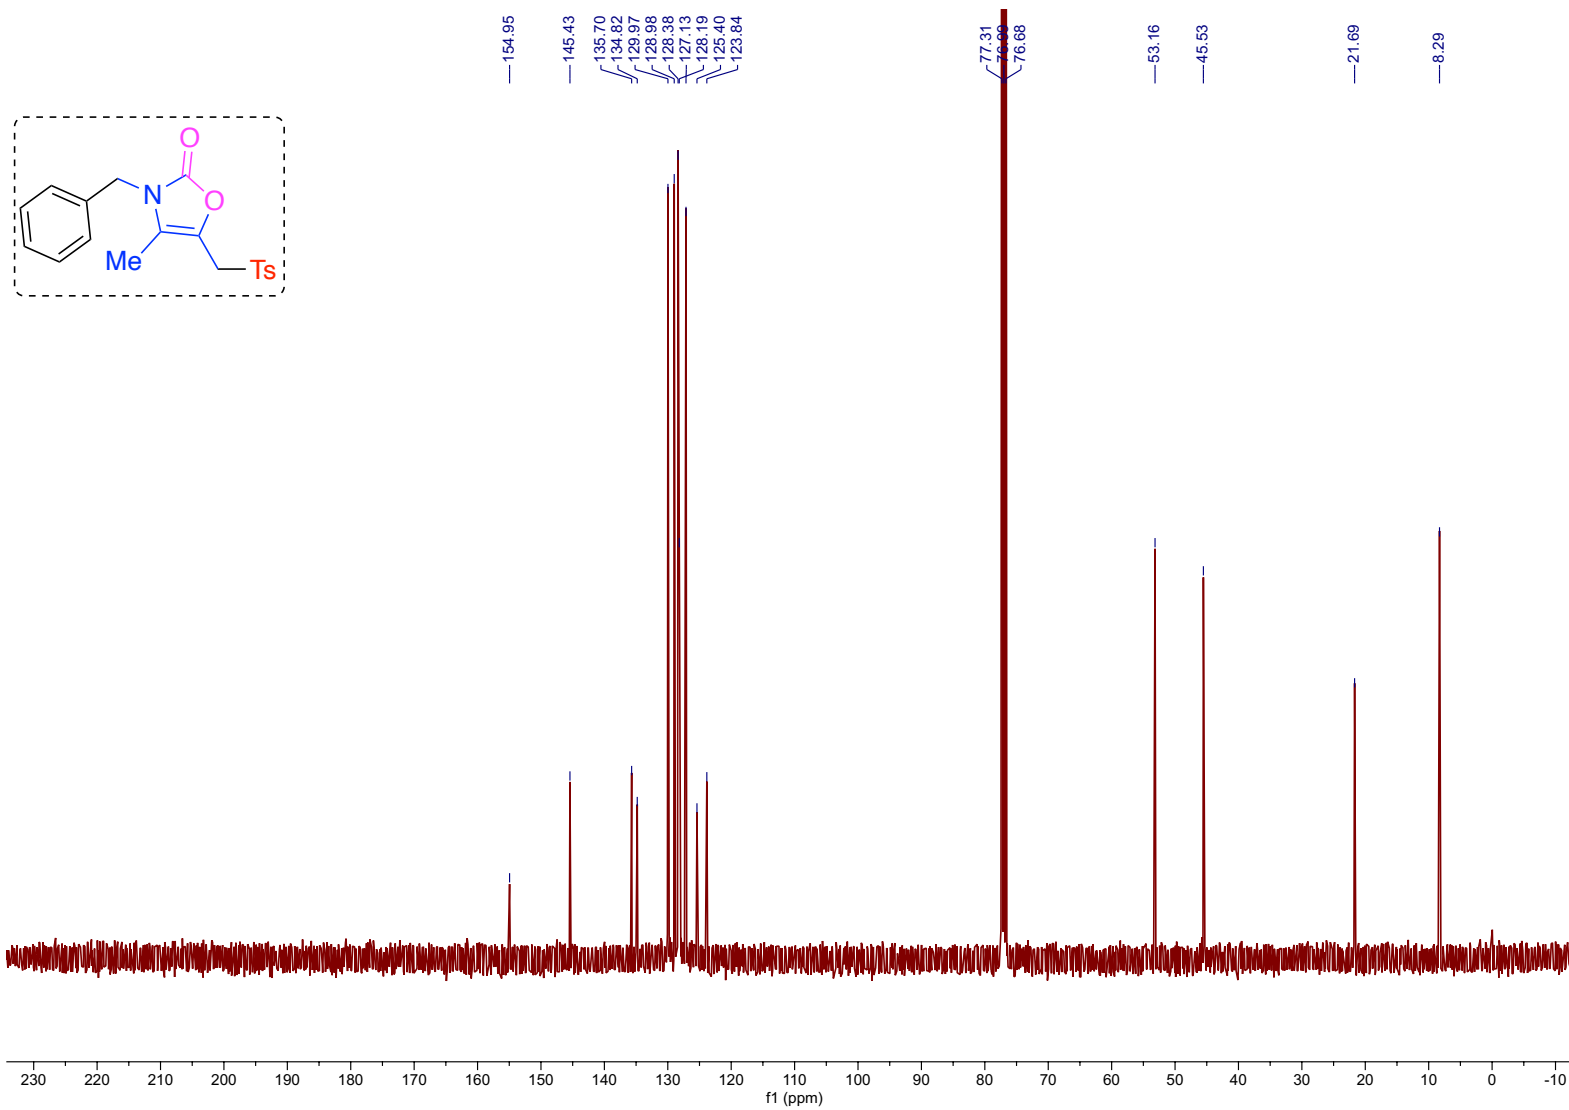

$^{13}\text{C}$  (101 MHz) spectra of compound 3u in  $\text{CDCl}_3$

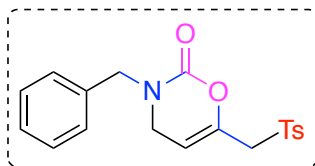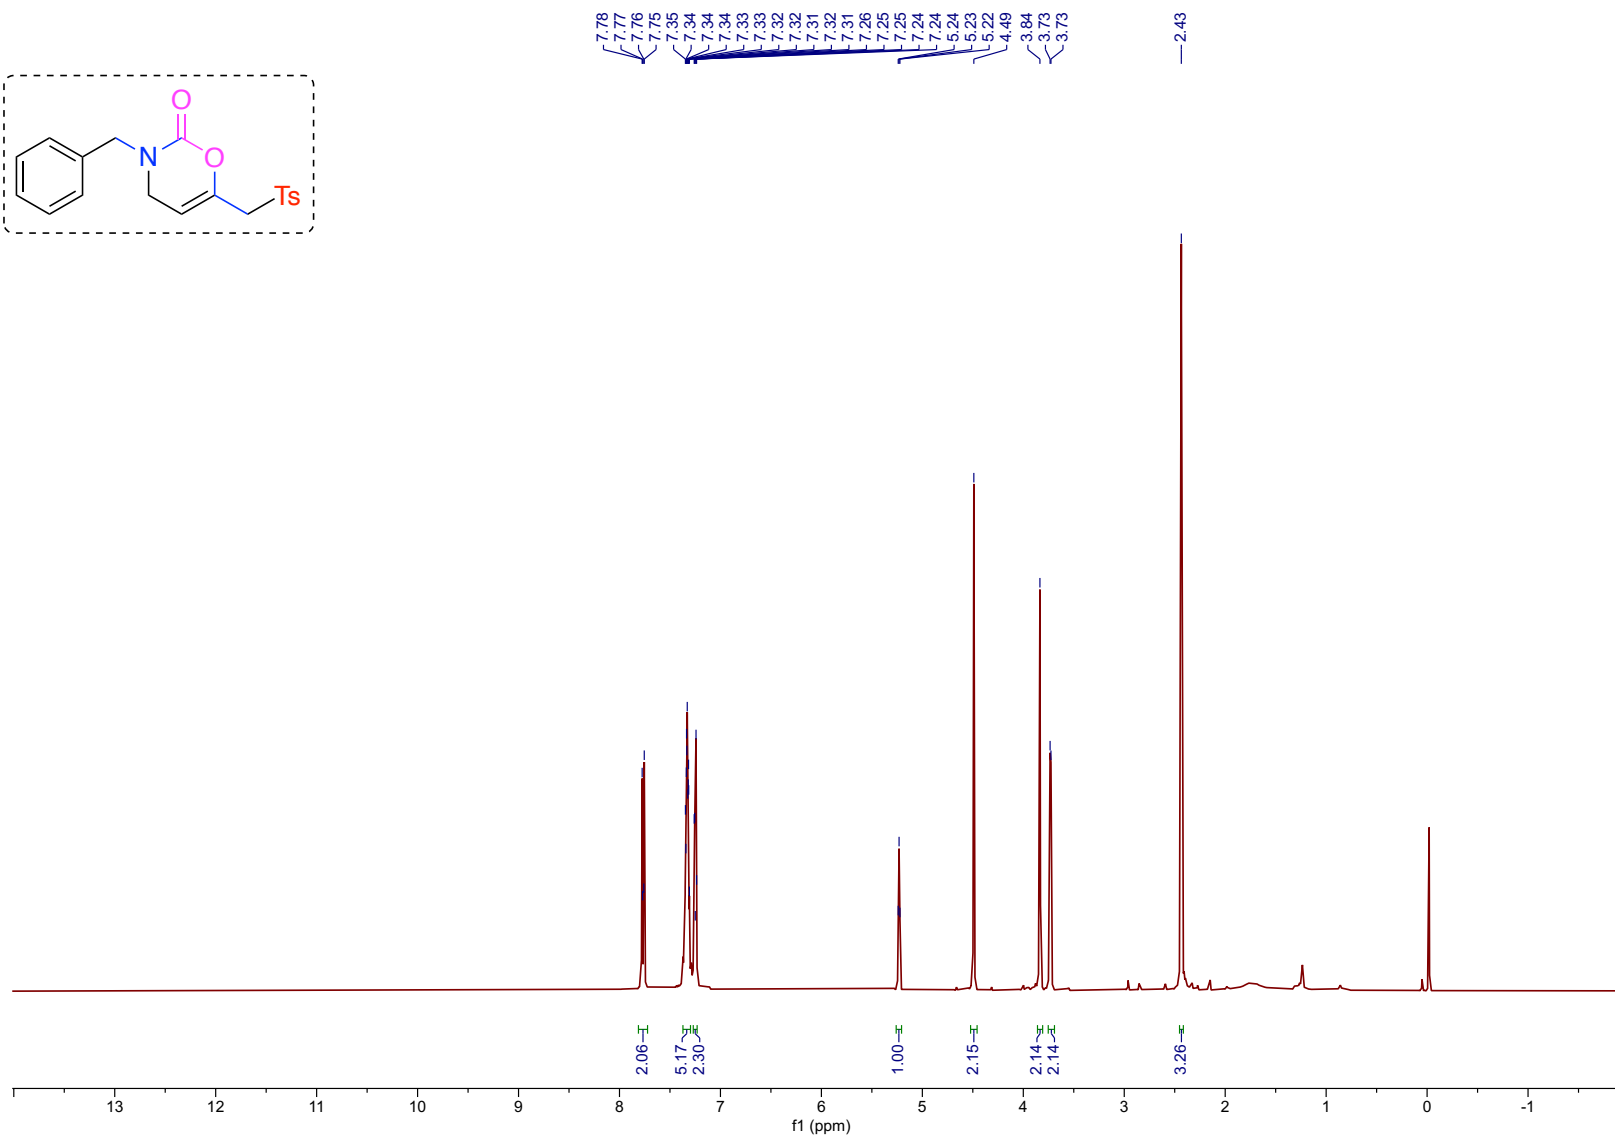

$^1\text{H}$  (400 MHz) spectrum of compound 4a in  $\text{CDCl}_3$

S55

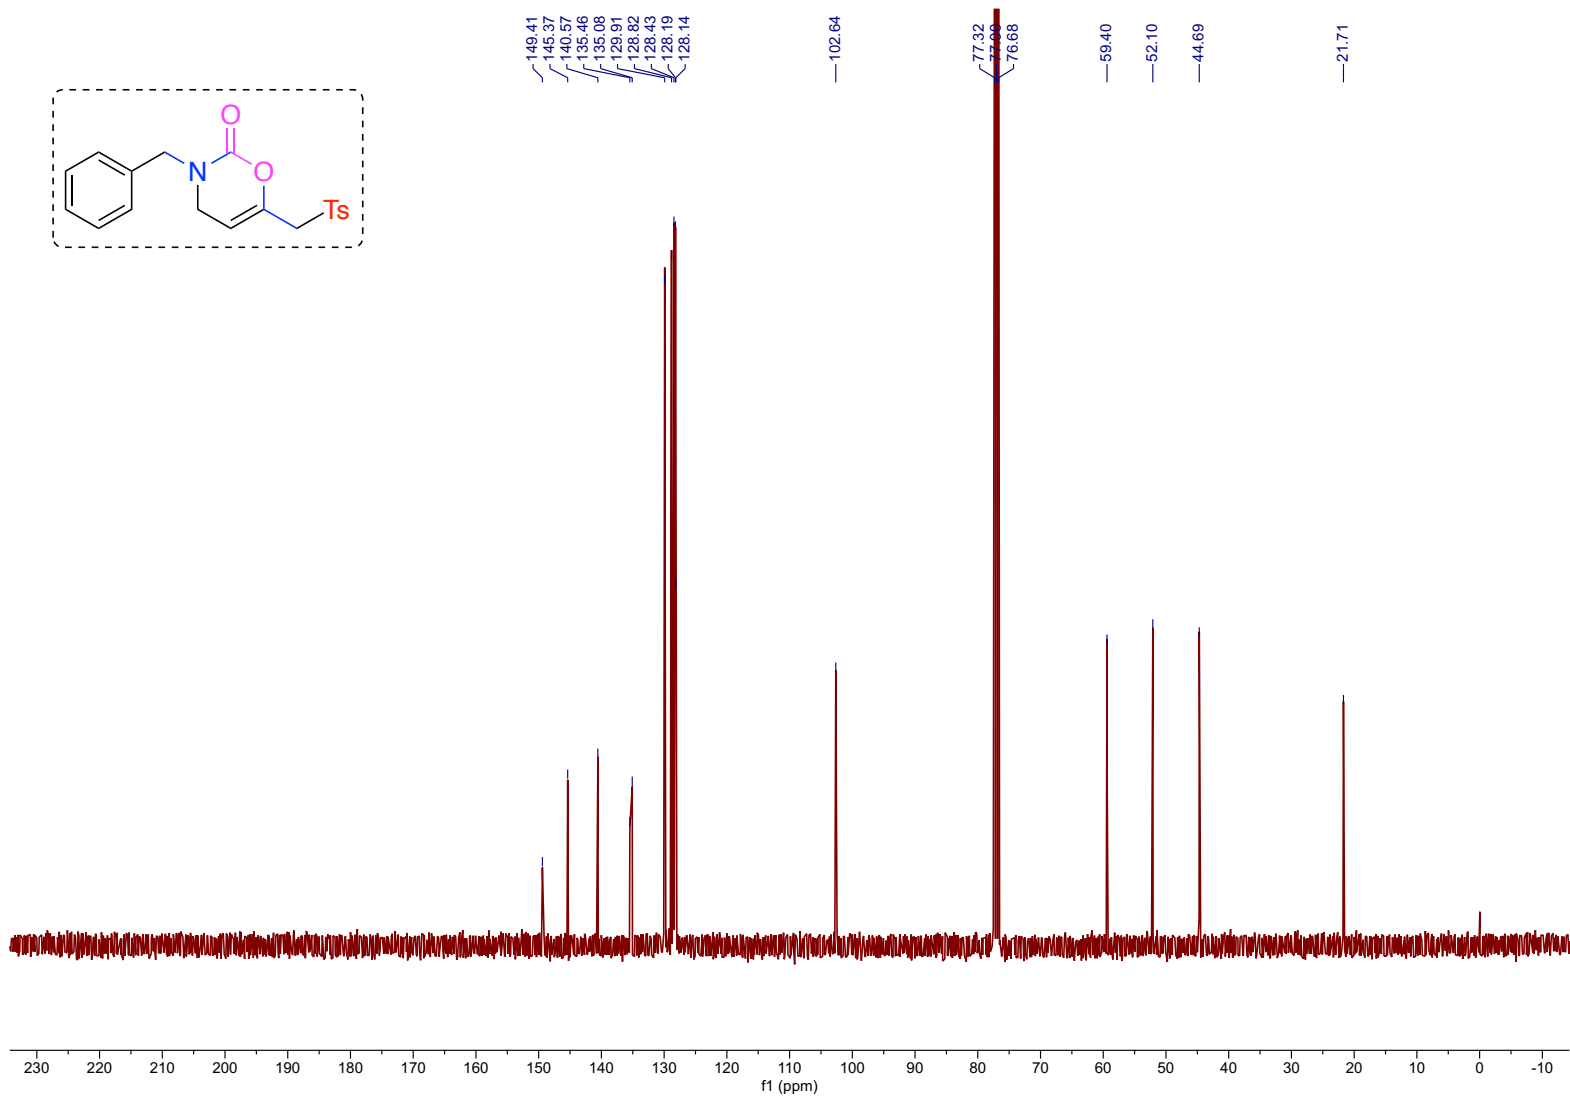

$^{13}\text{C}$  (101 MHz) spectrum of compound 4a in  $\text{CDCl}_3$



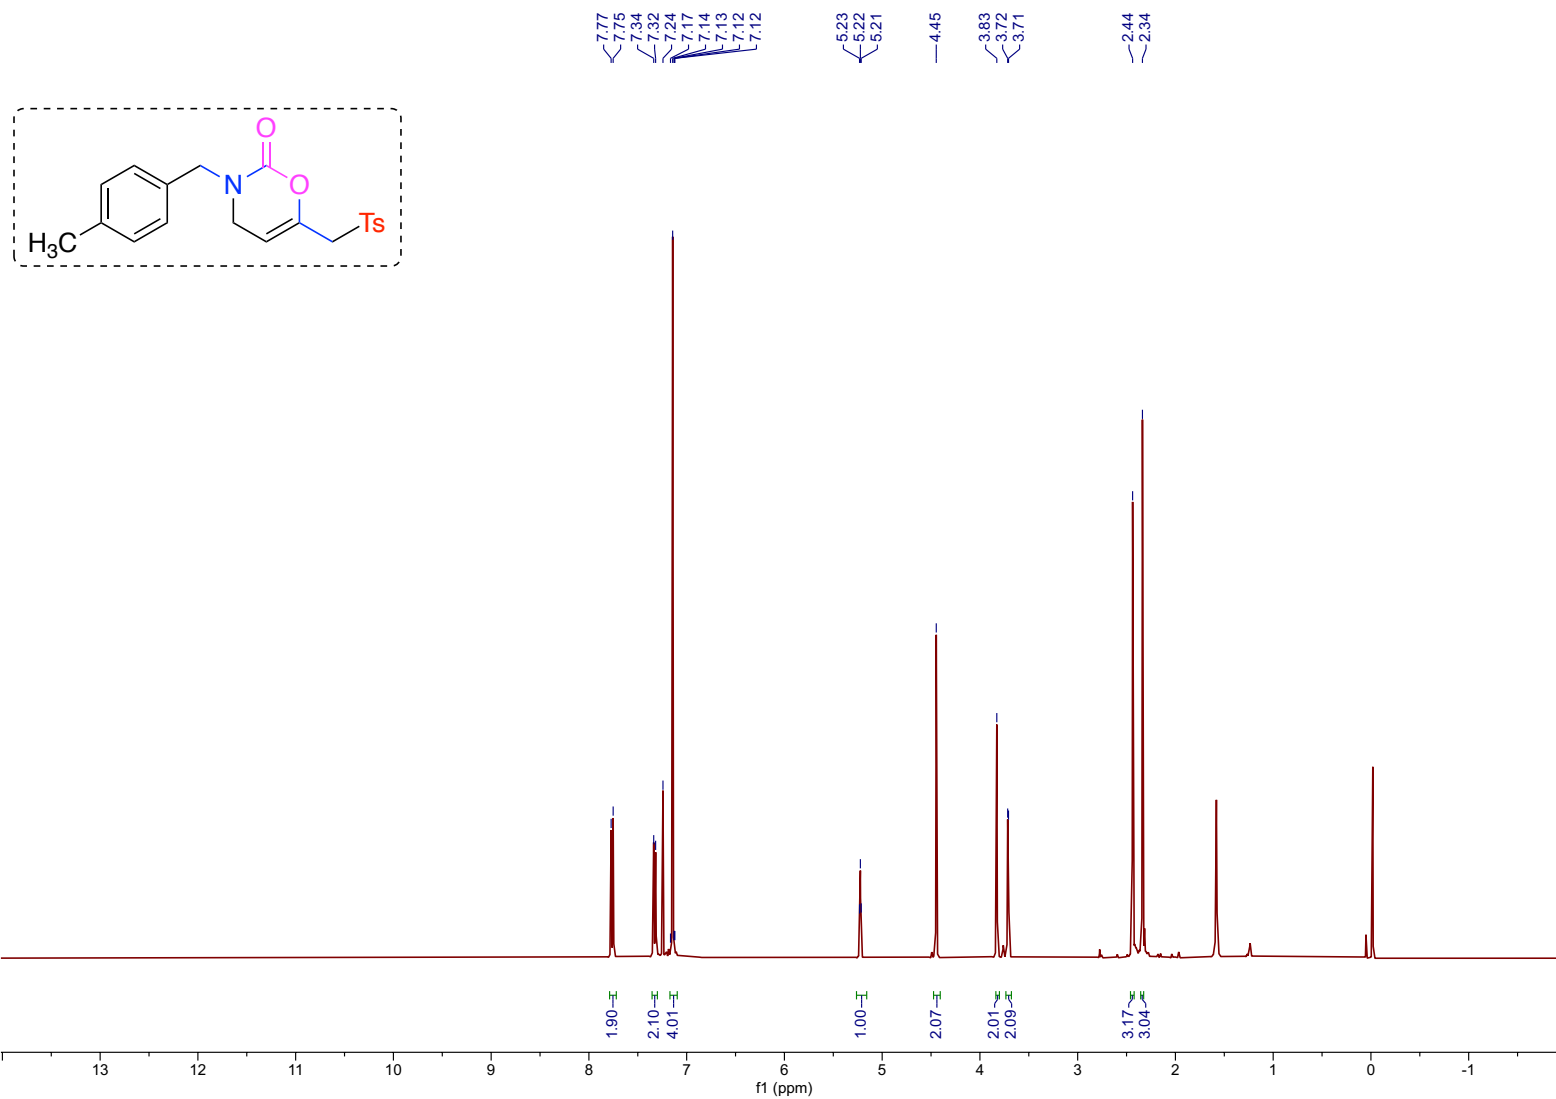

<sup>1</sup>H (400 MHz) spectrum of compound 4b in CDCl<sub>3</sub>

S57

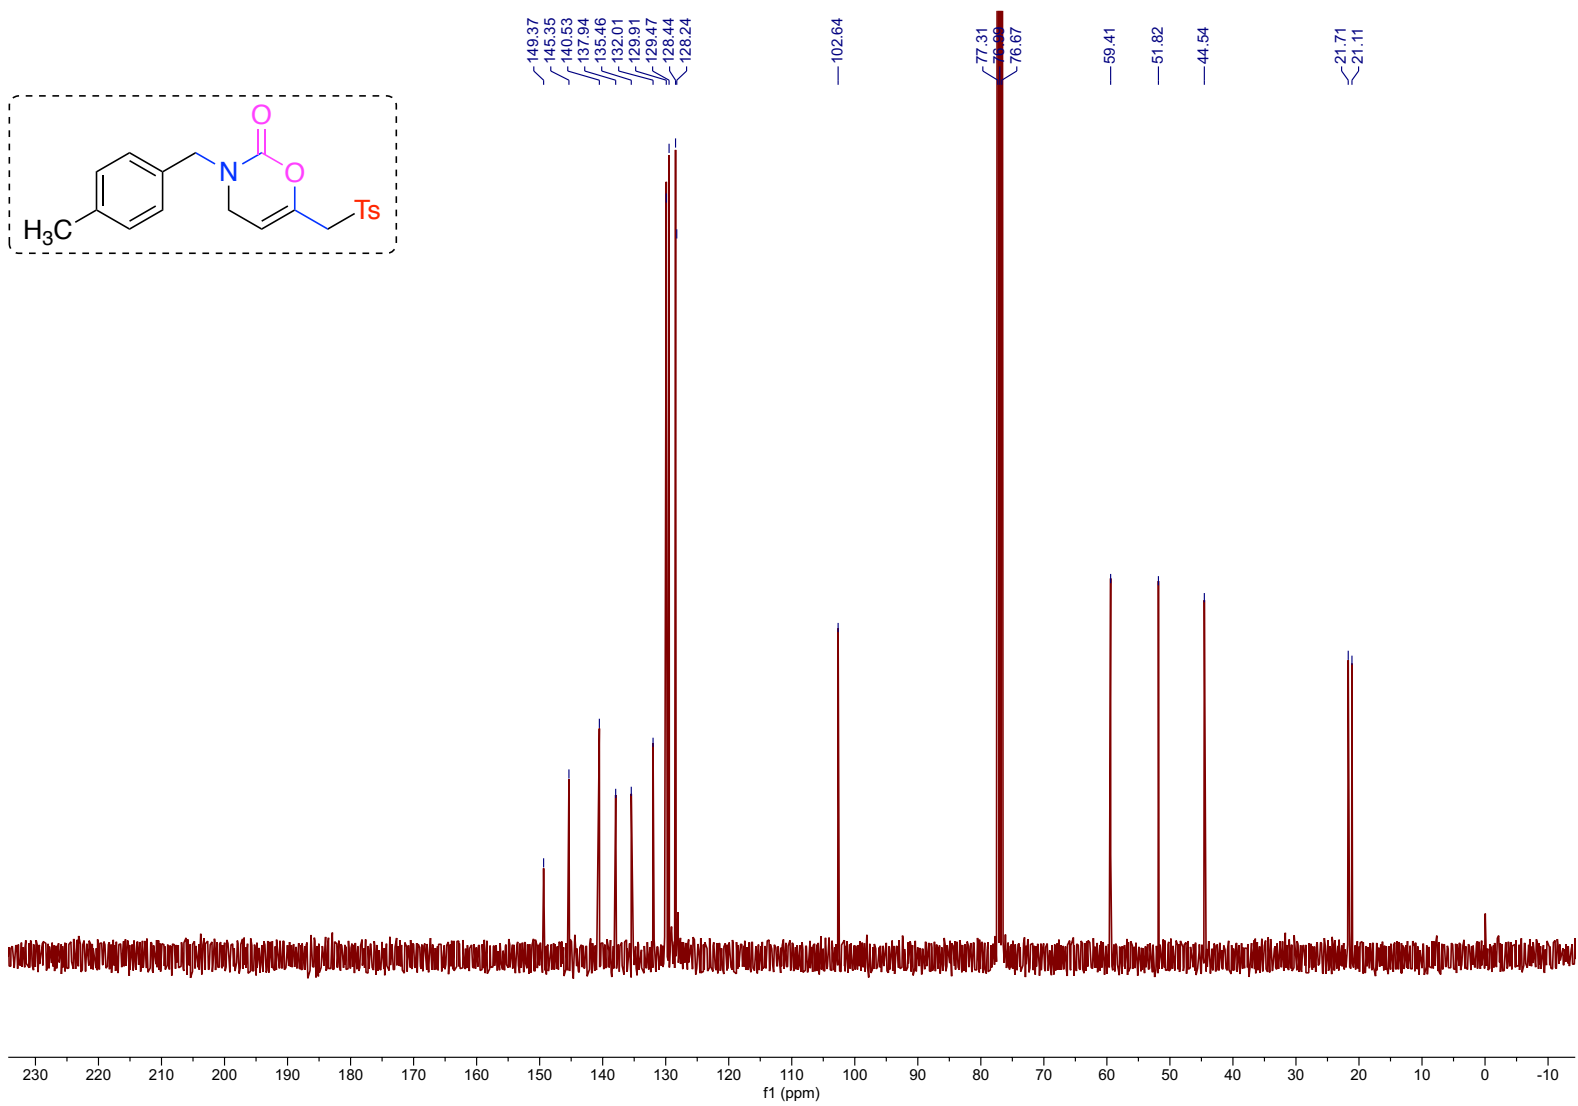

$^{13}\text{C}$  (101 MHz) spectrum of compound 4b in  $\text{CDCl}_3$

S58

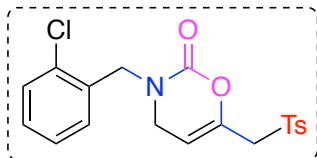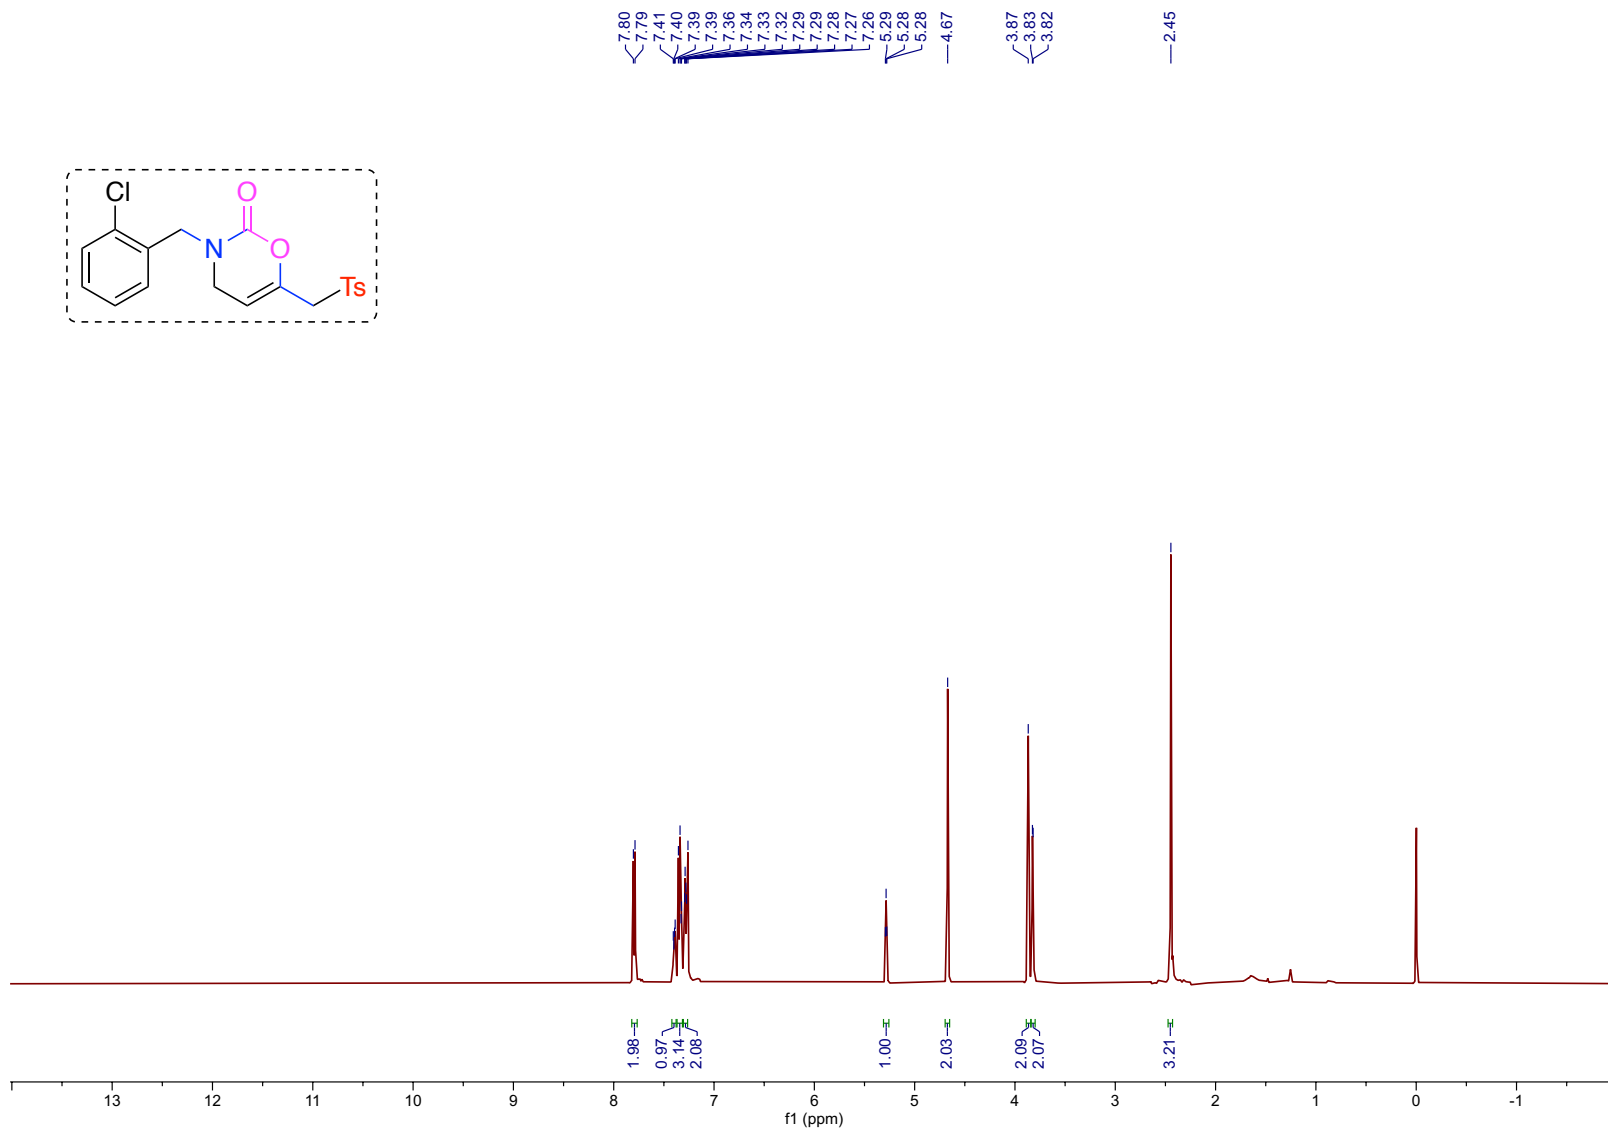

$^1\text{H}$  (500 MHz) spectrum of compound 4c in  $\text{CDCl}_3$

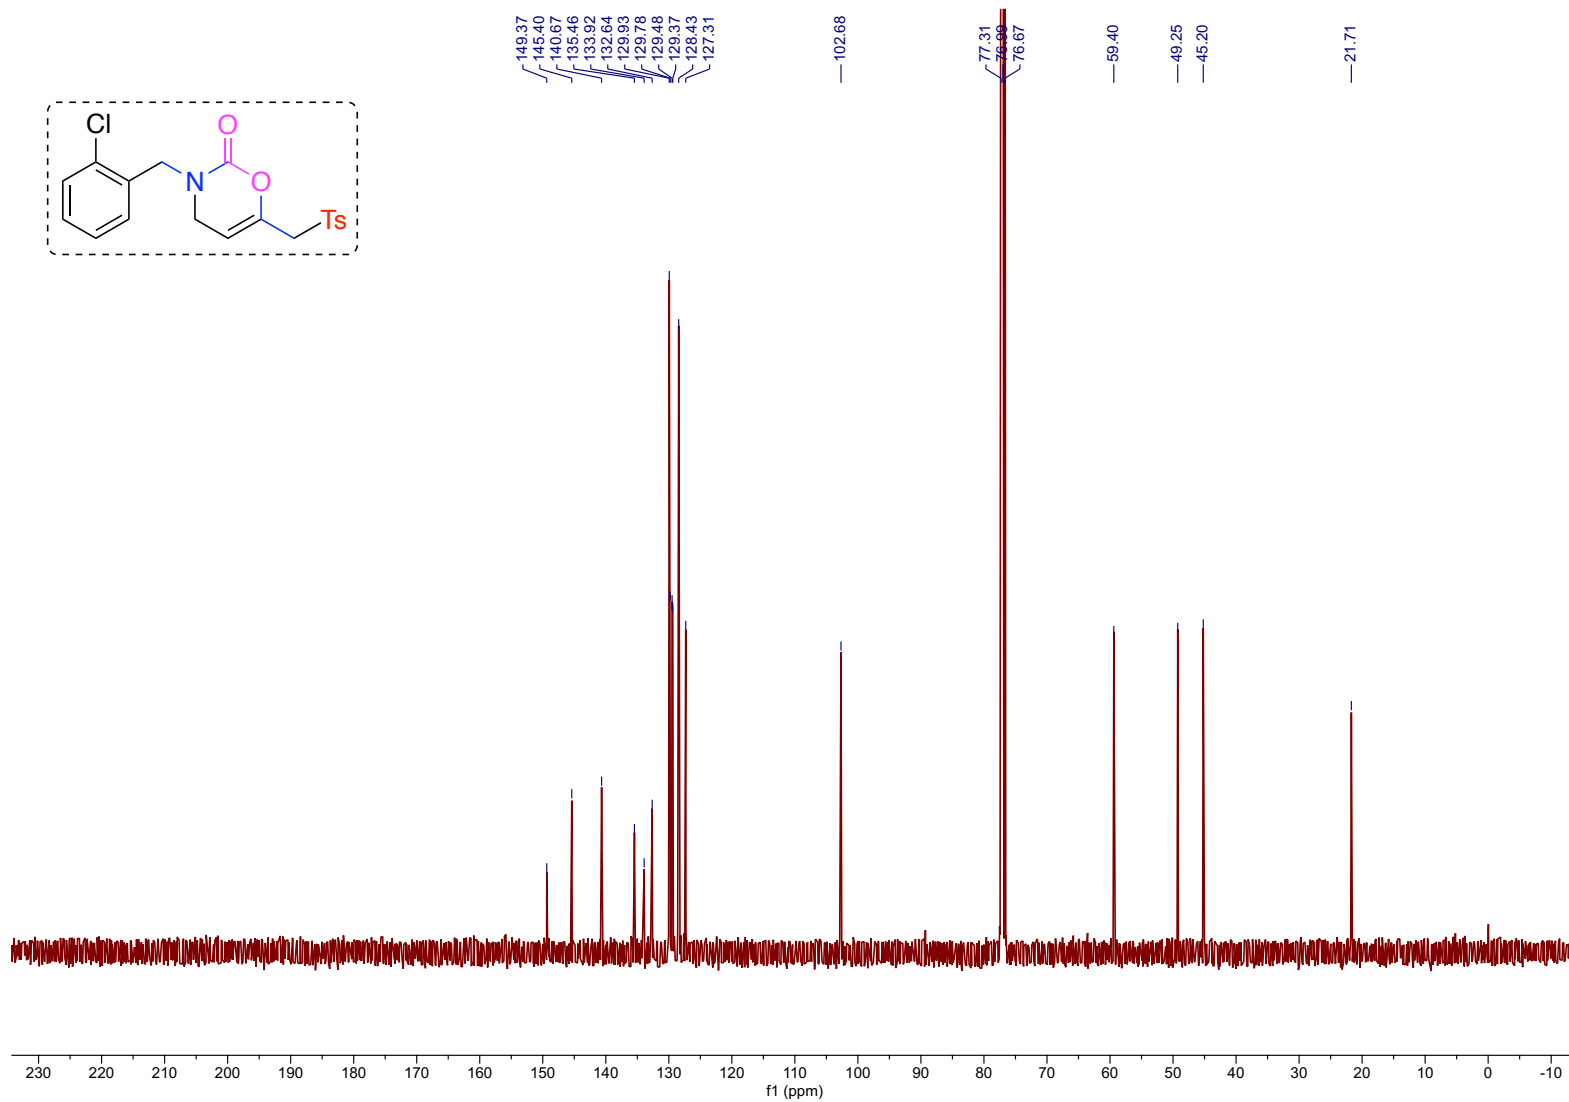

$^{13}\text{C}$  (101 MHz) spectrum of compound 4c in  $\text{CDCl}_3$

S60

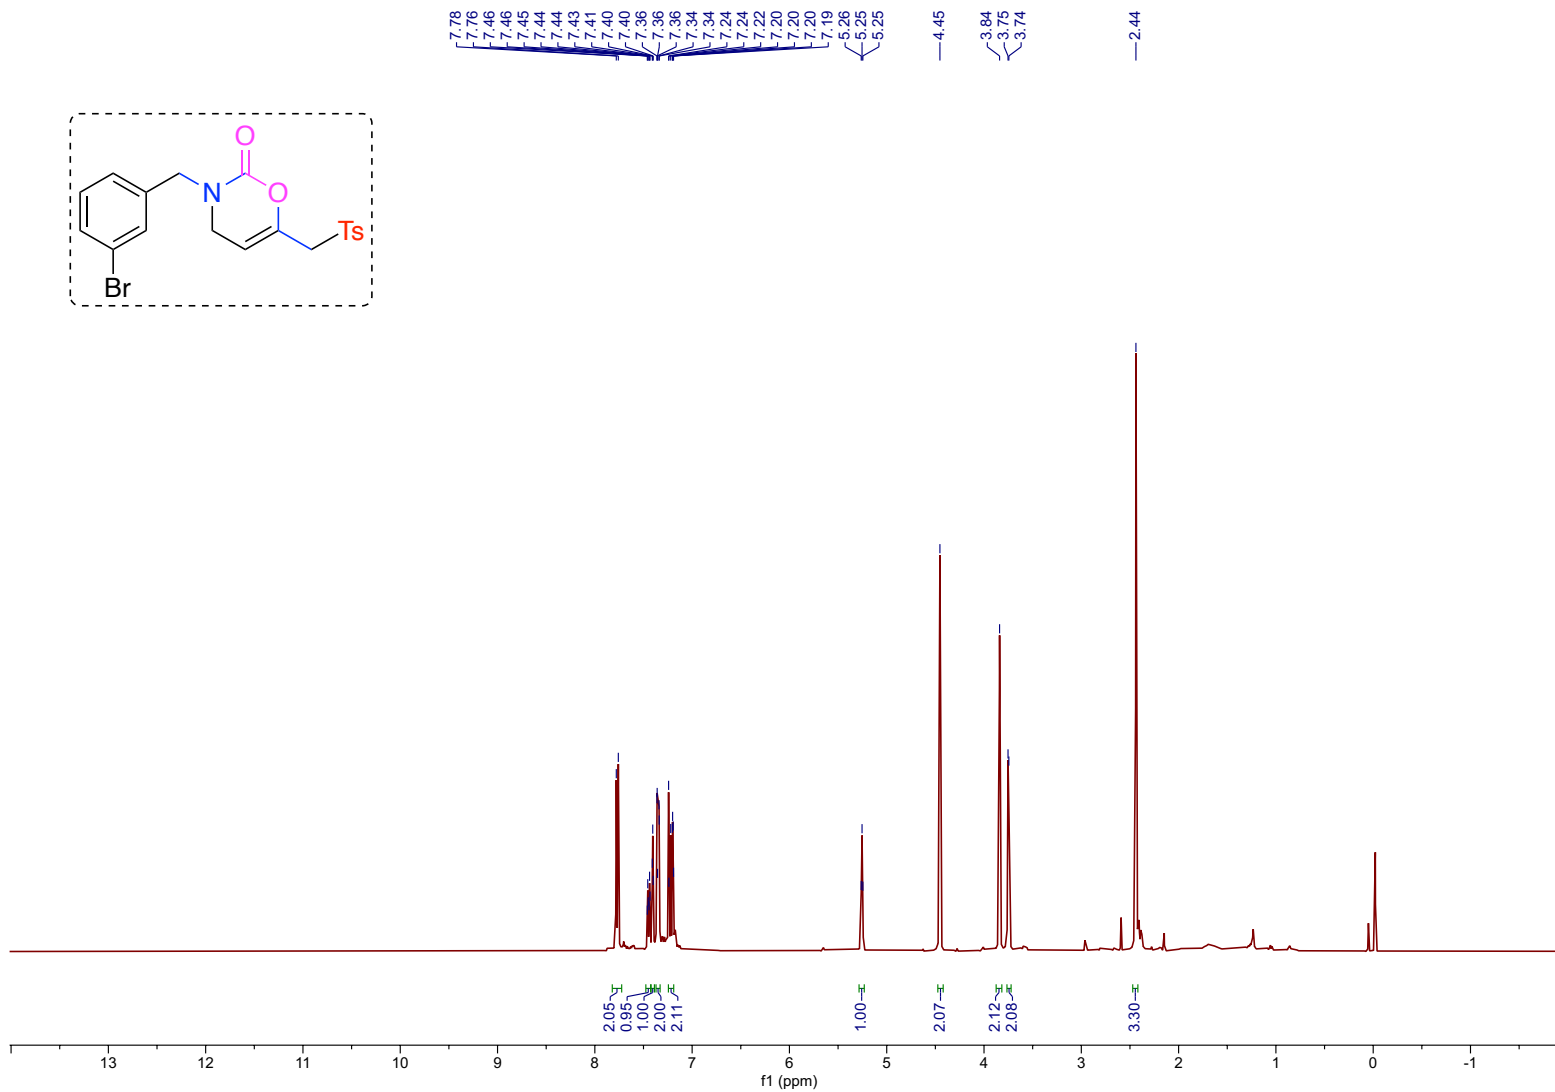

$^1\text{H}$  (400 MHz) spectrum of compound 4d in  $\text{CDCl}_3$

S61

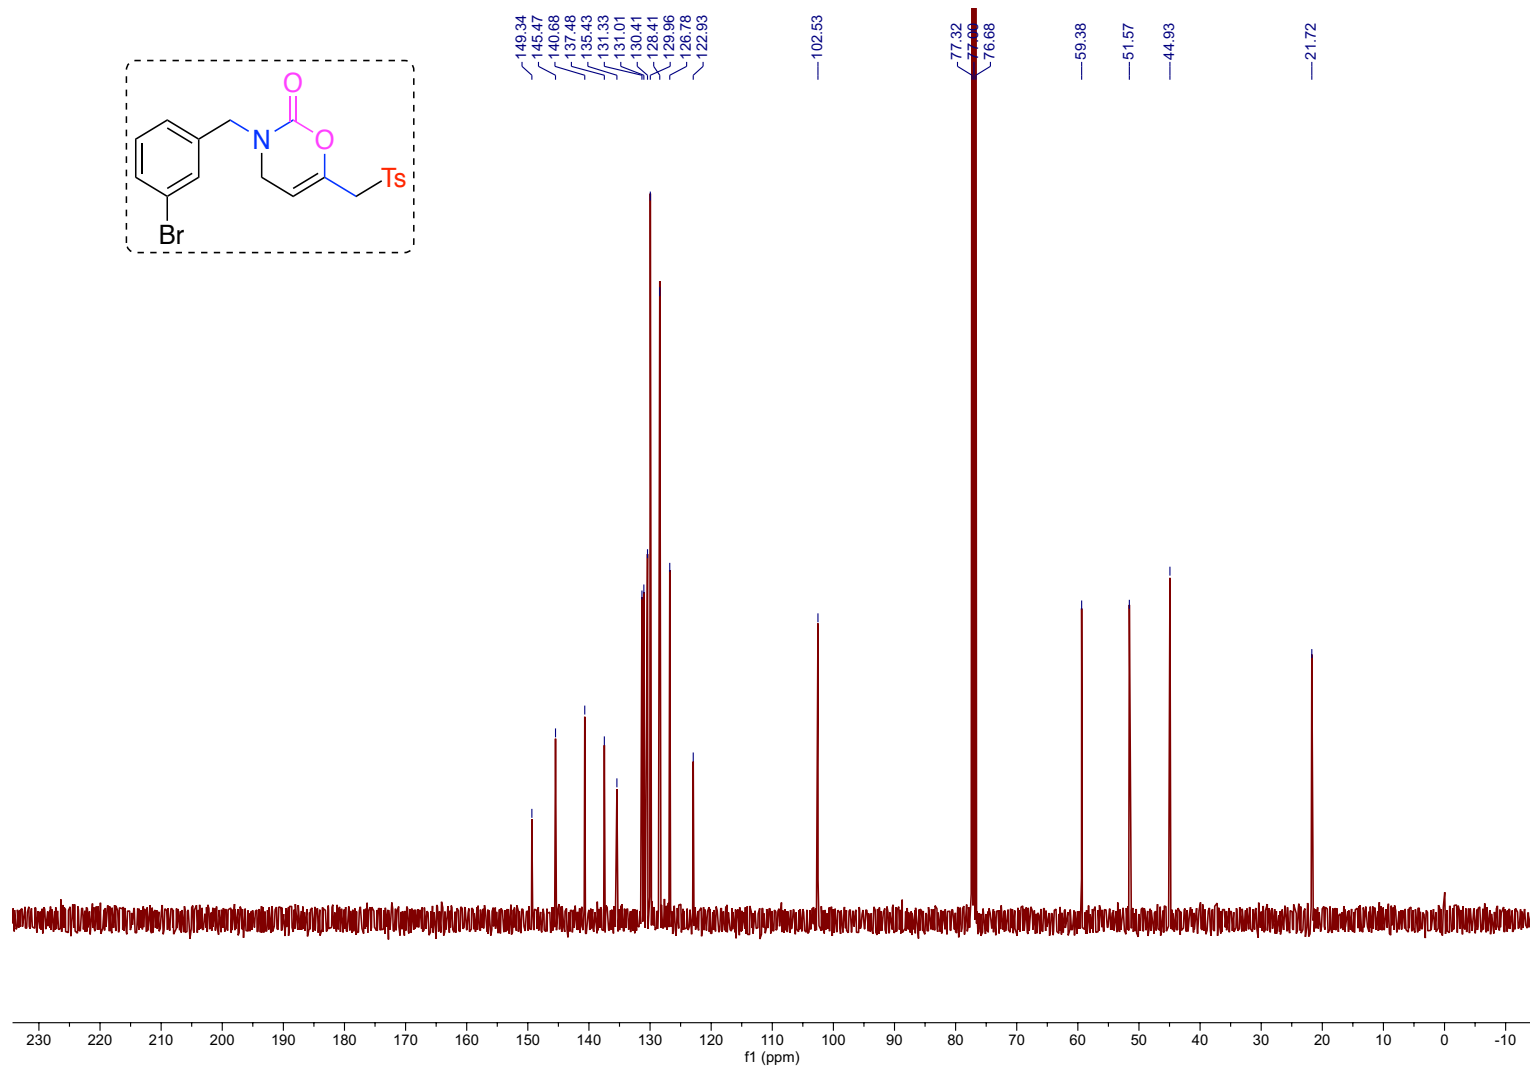

$^{13}\text{C}$  (101 MHz) spectrum of compound 4d in  $\text{CDCl}_3$

S62

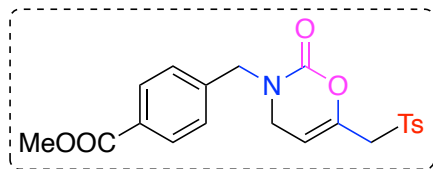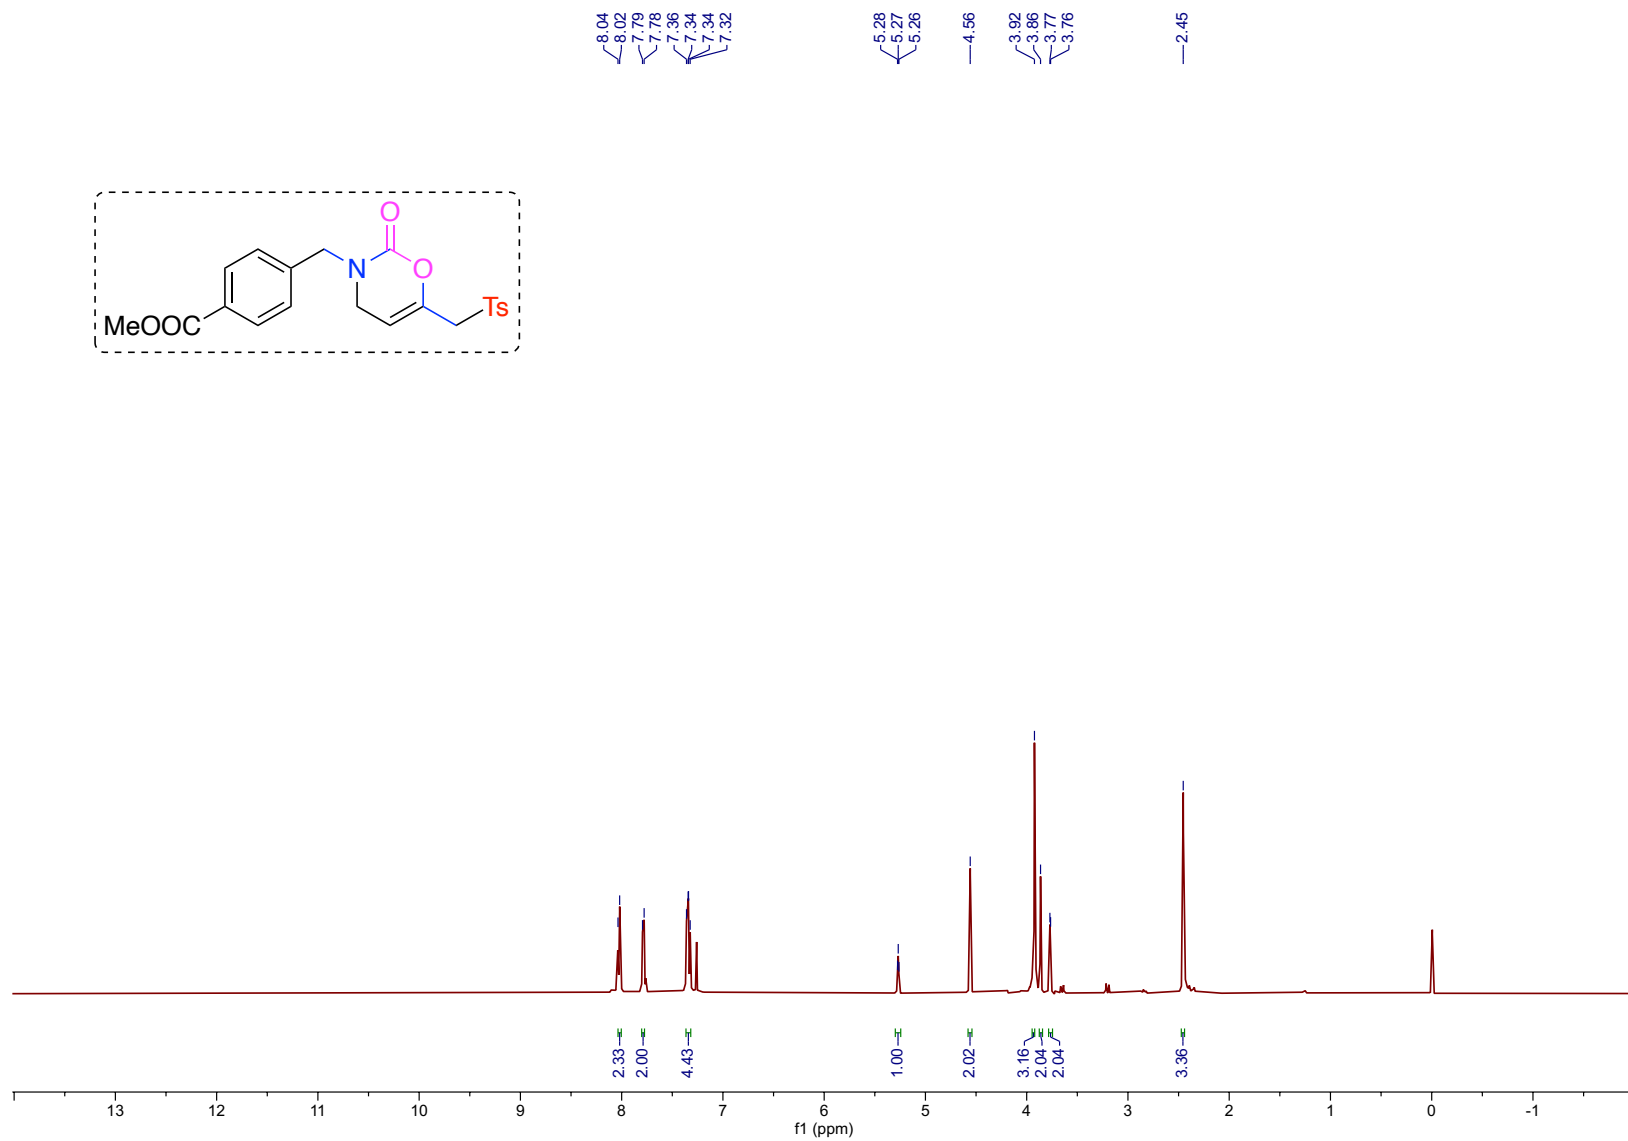

<sup>1</sup>H (500 MHz) spectrum of compound 4e in CDCl<sub>3</sub>

S63

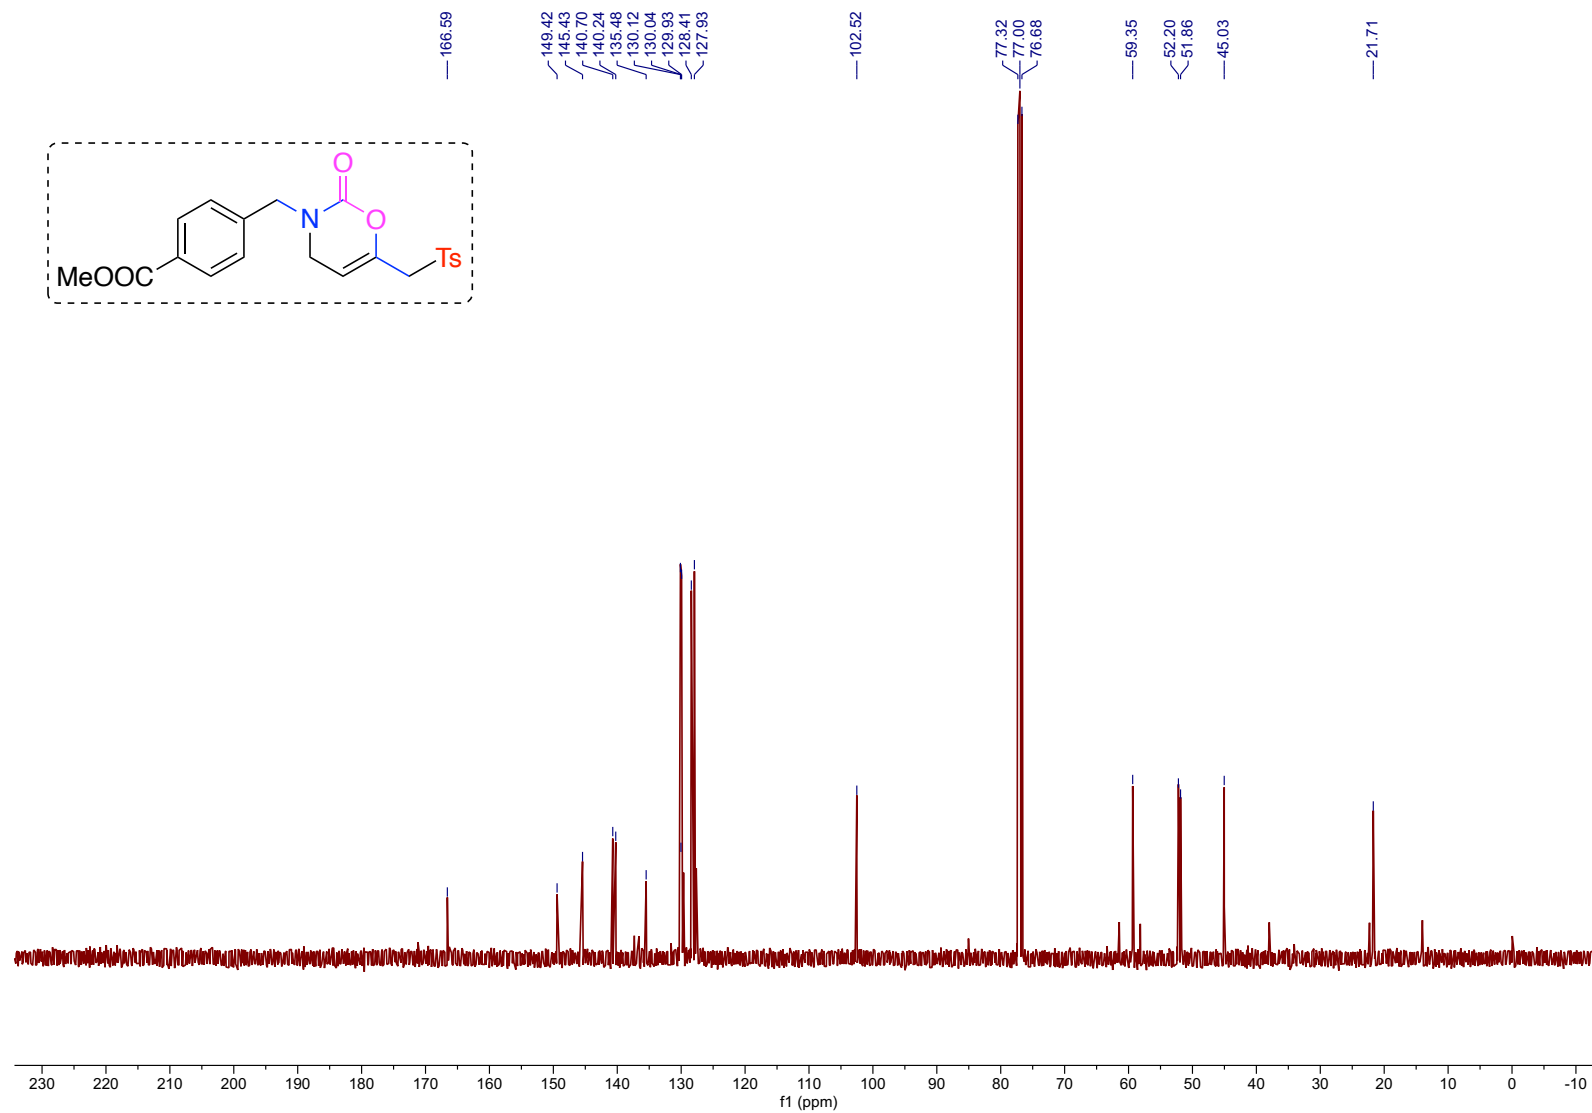

S64



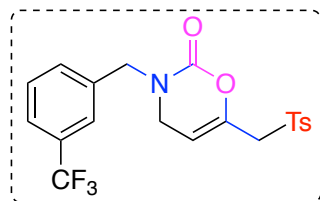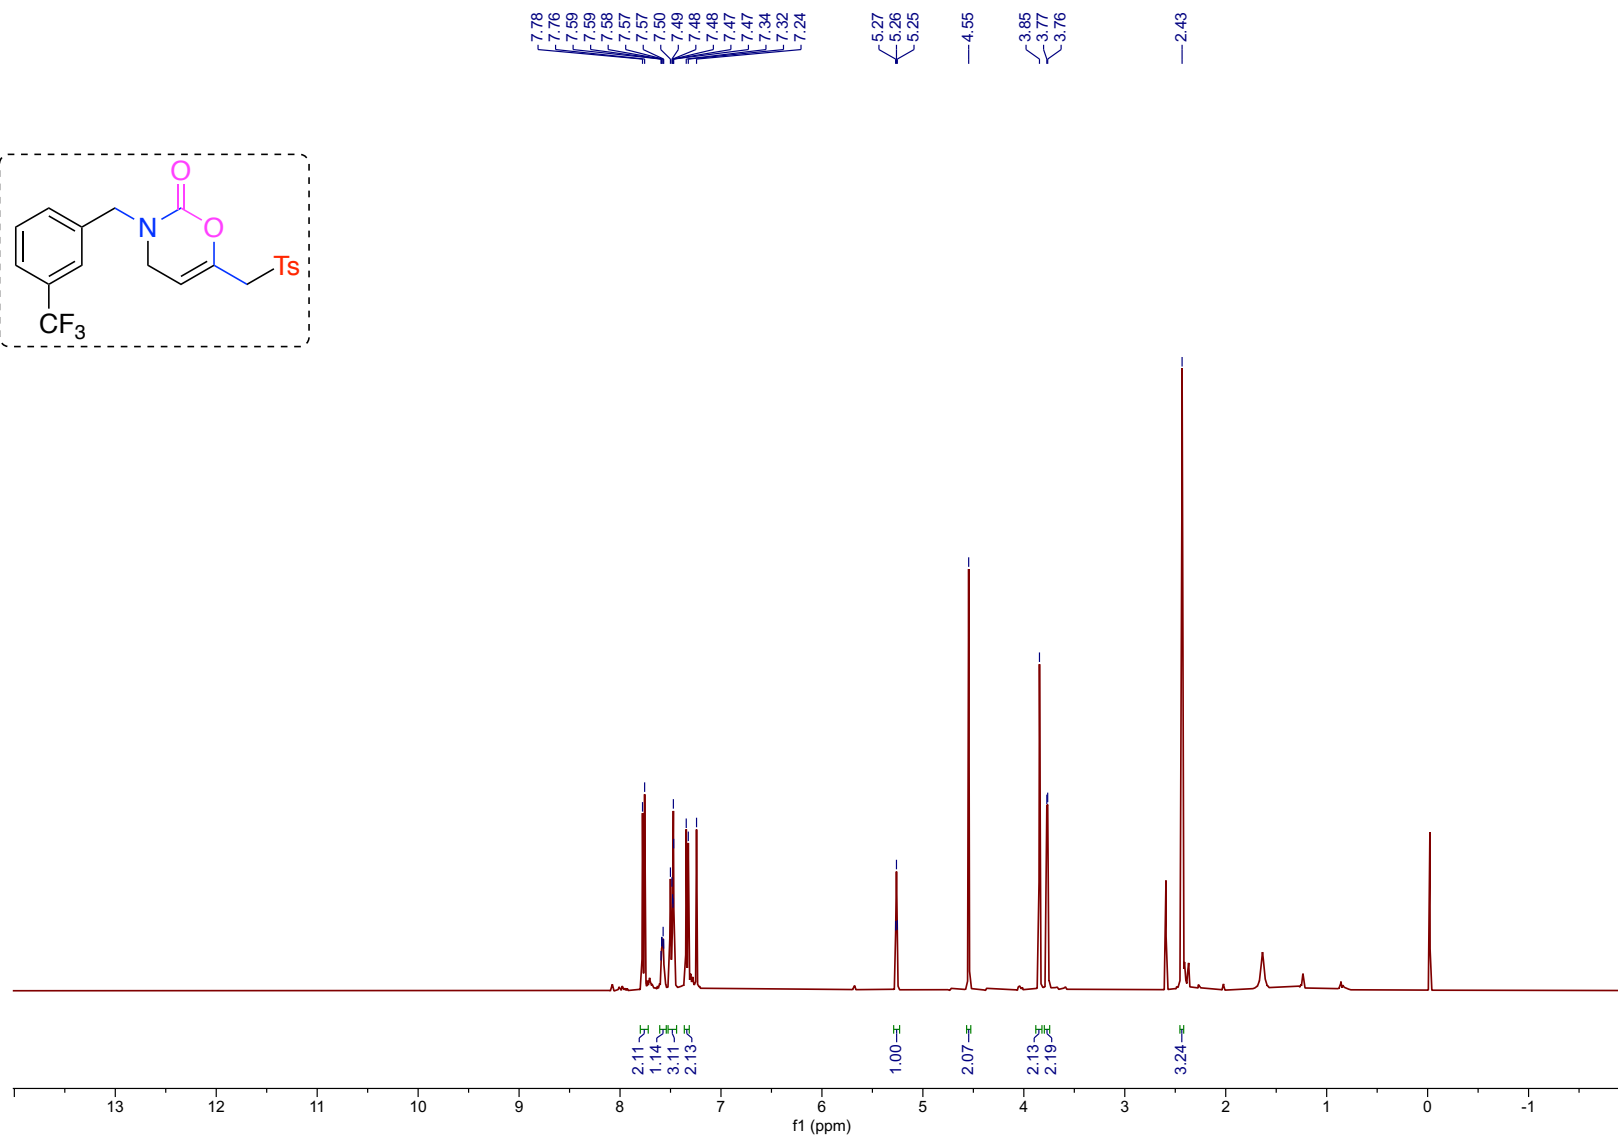

<sup>1</sup>H (400 MHz) spectrum of compound 4f in CDCl<sub>3</sub>

S65

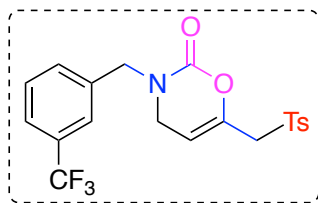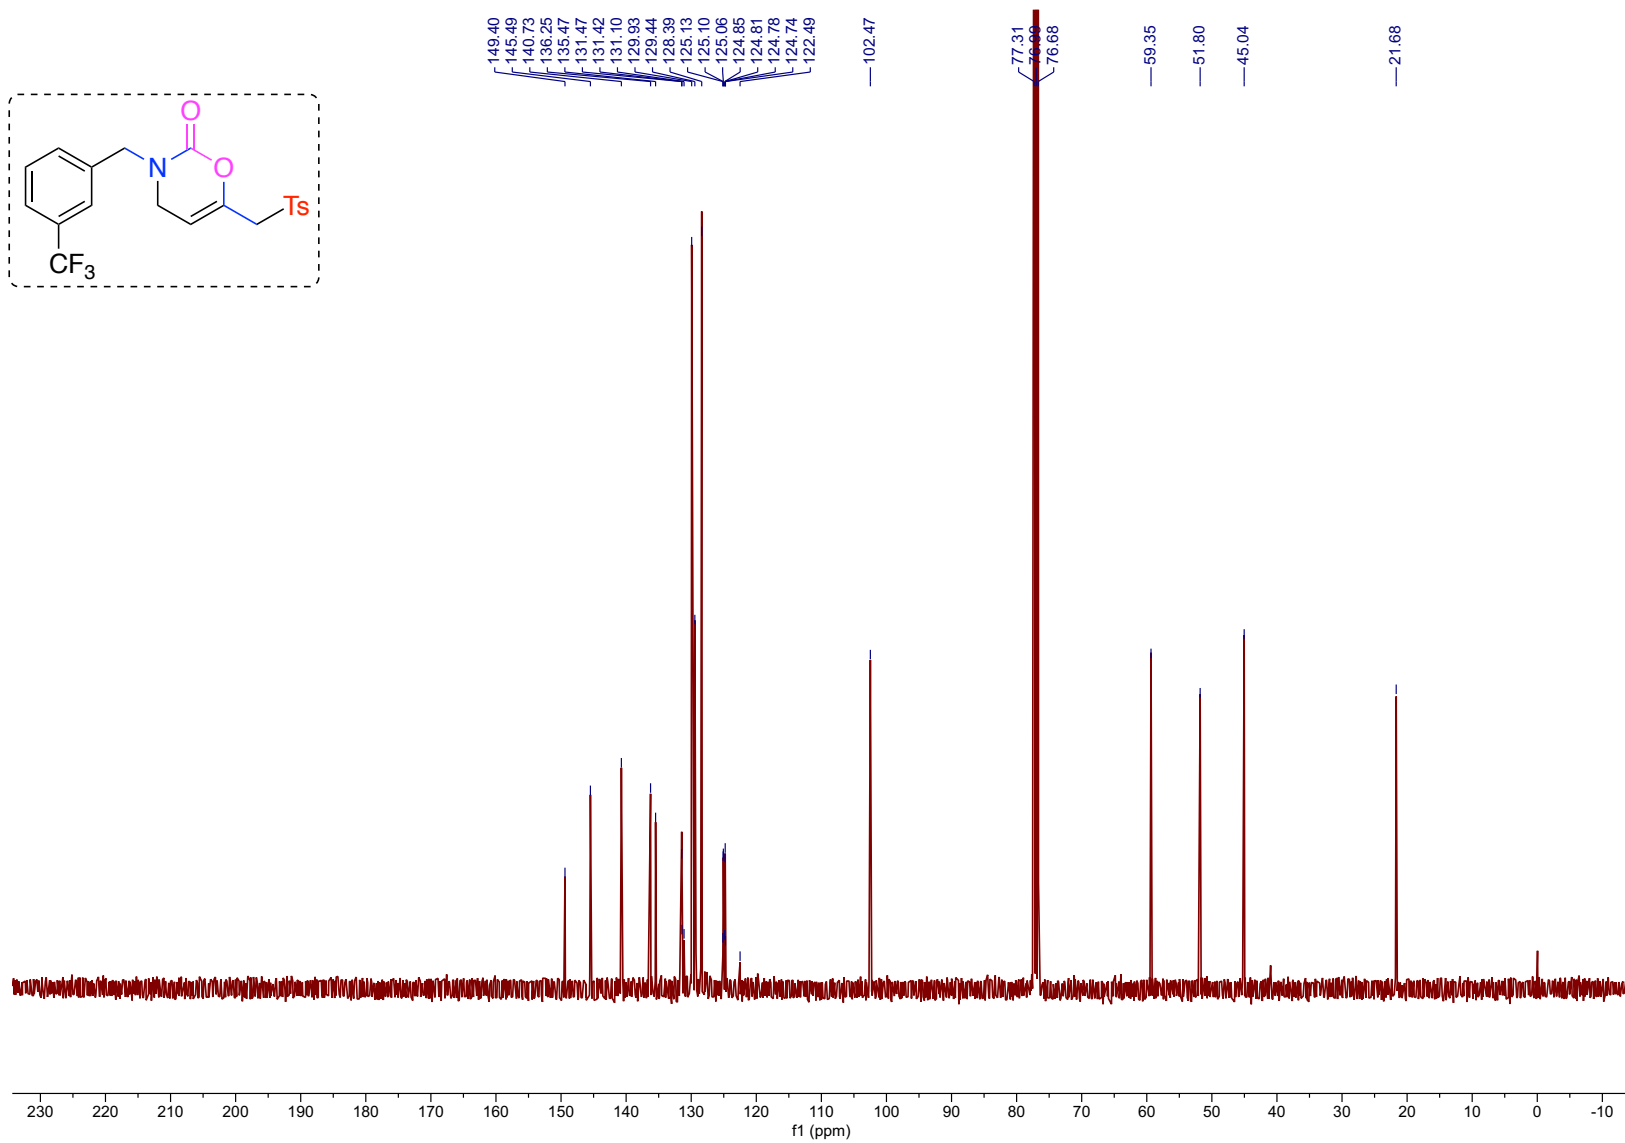

$^{13}\text{C}$  (101 MHz) spectrum of compound 4f in  $\text{CDCl}_3$

S66

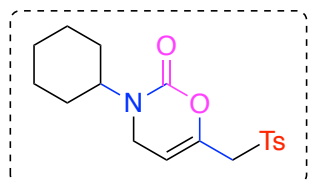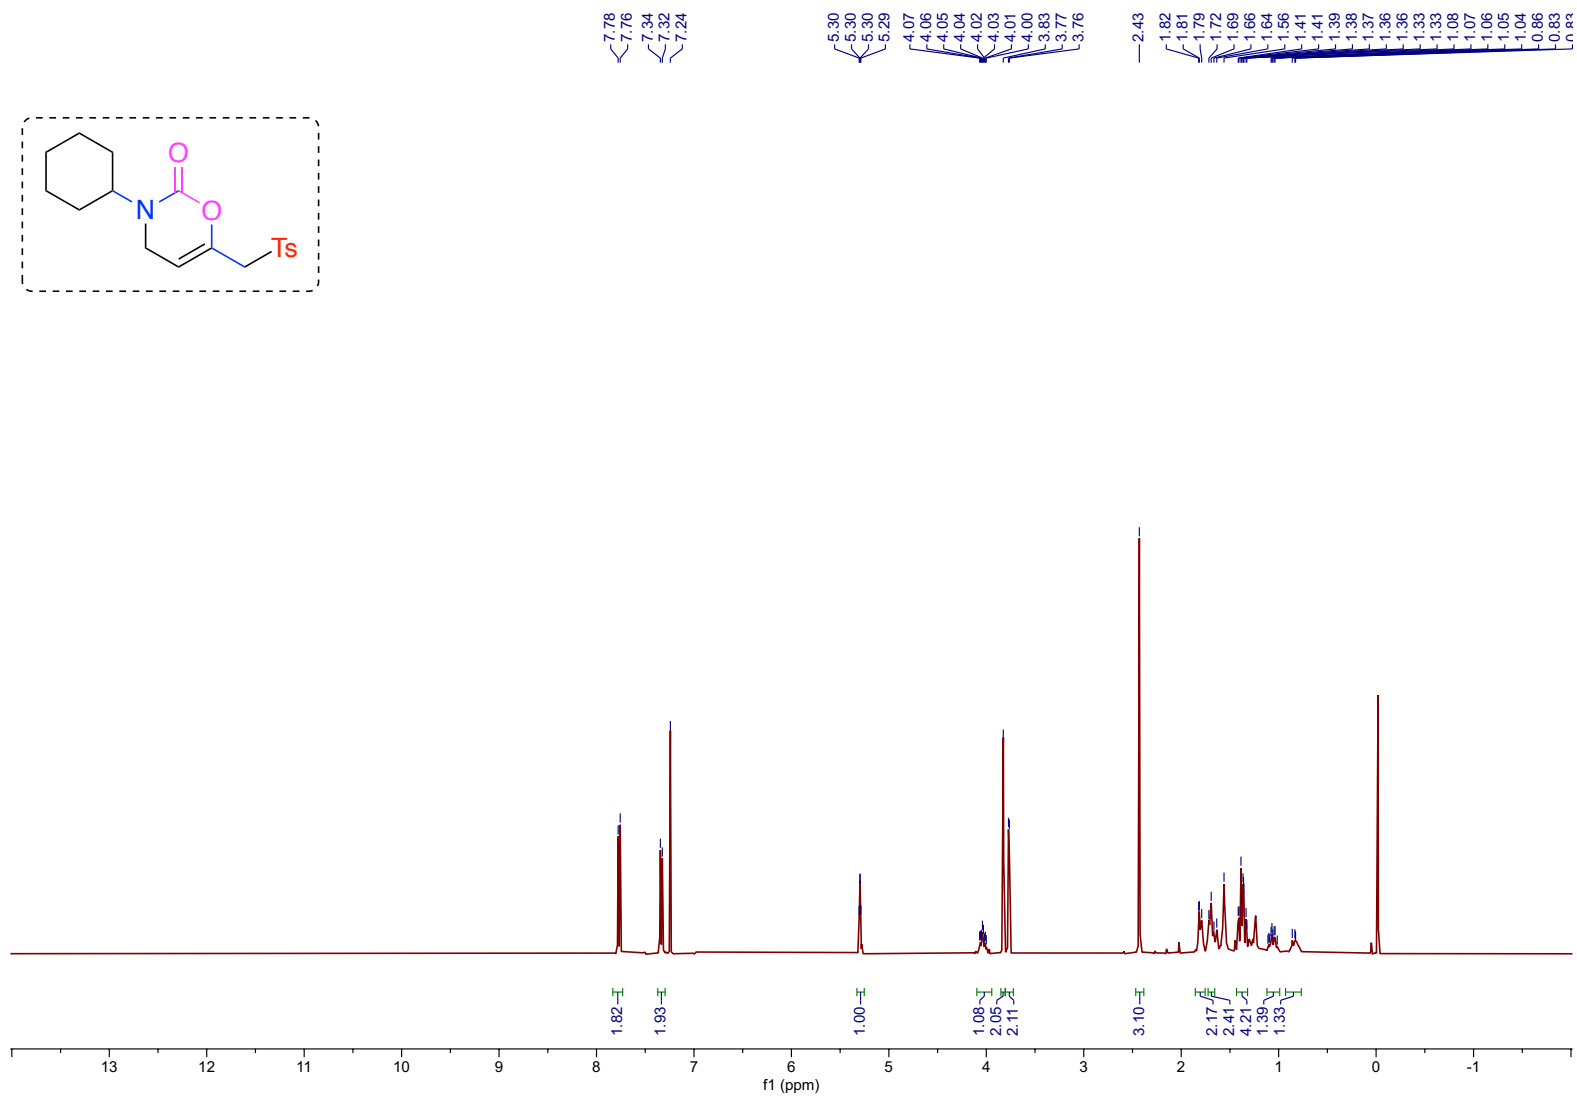

$^1\text{H}$  (400 MHz) spectrum of compound 4g in  $\text{CDCl}_3$

S67

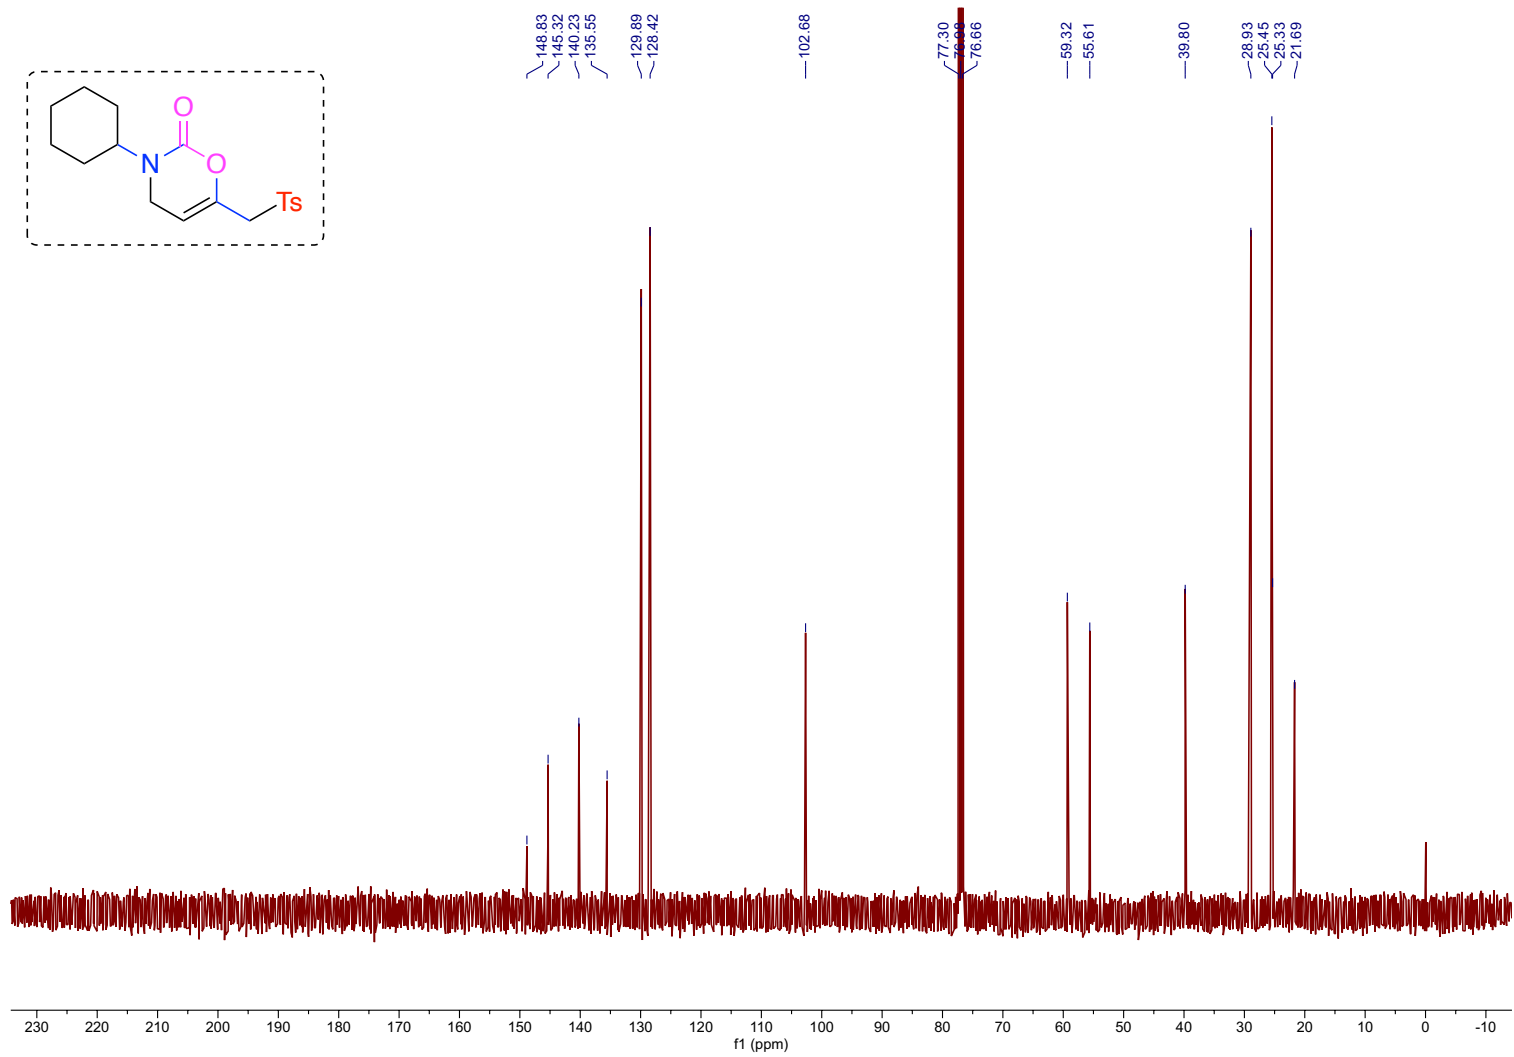

$^{13}\text{C}$  (101 MHz) spectrum of compound 4g in  $\text{CDCl}_3$

S68

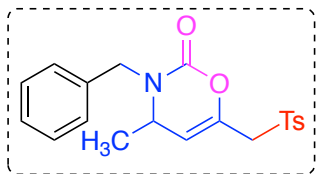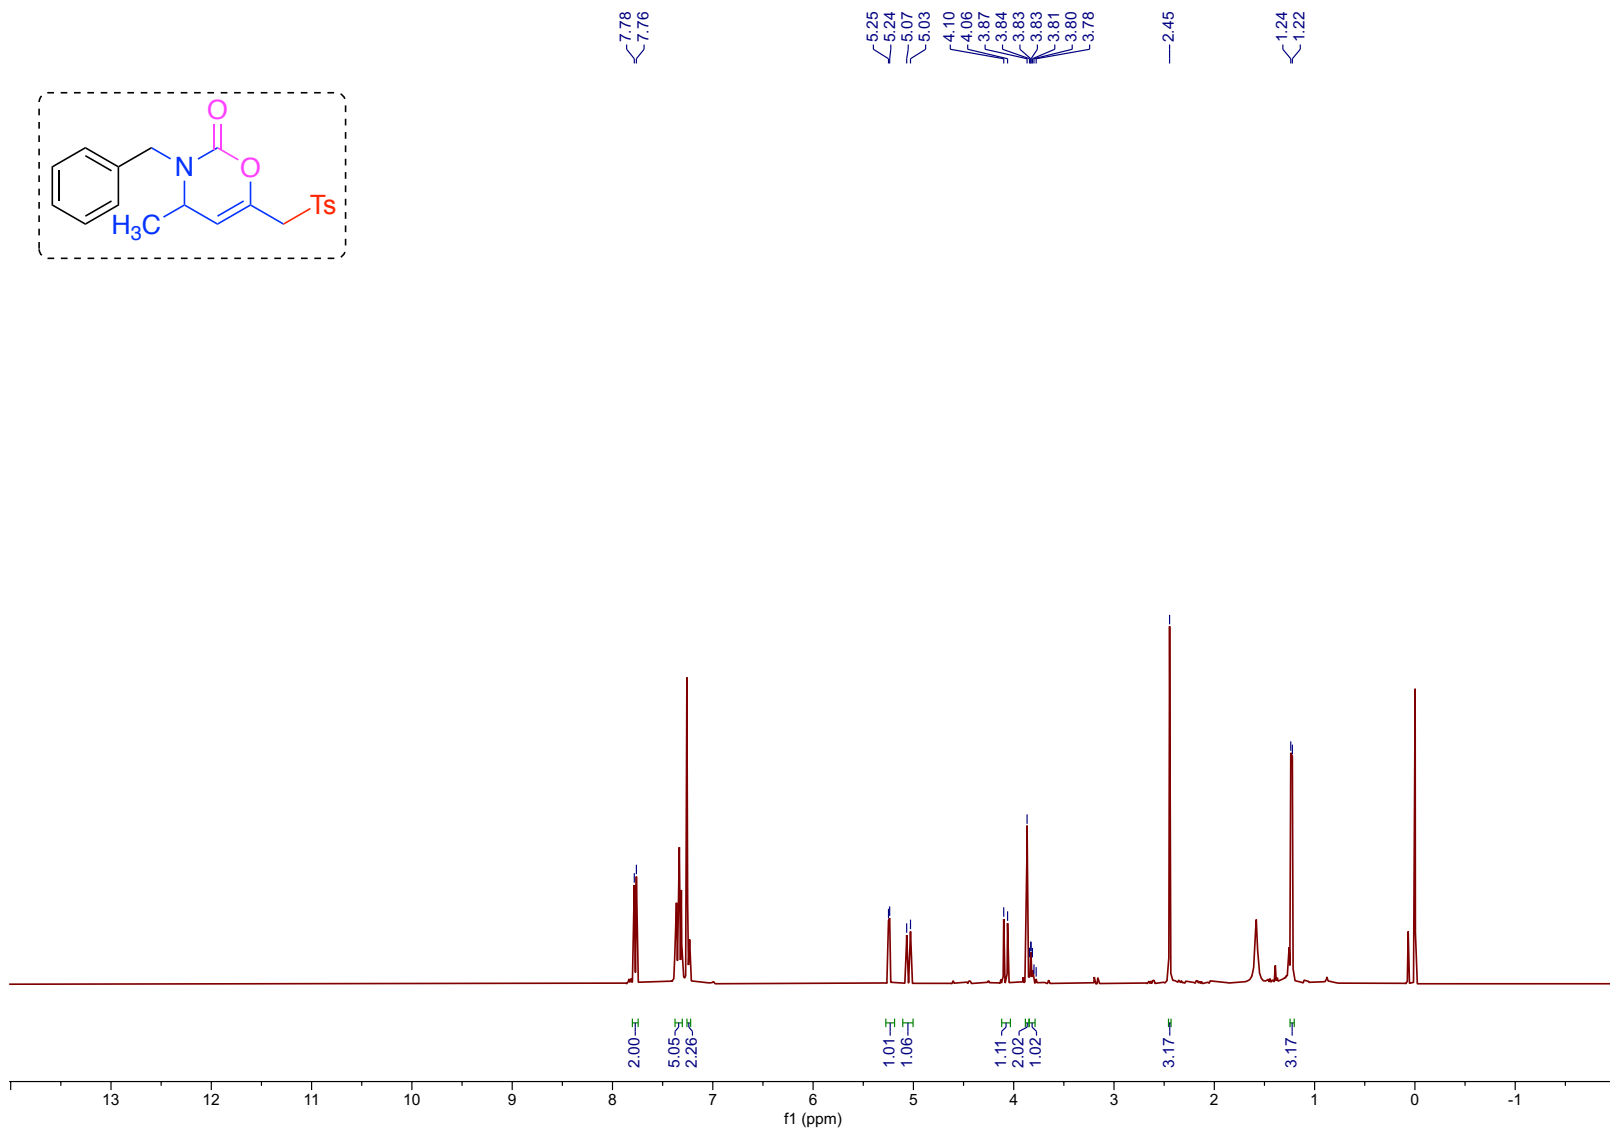

**<sup>1</sup>H (400 MHz) spectrum of compound 4h in CDCl<sub>3</sub>**

S69

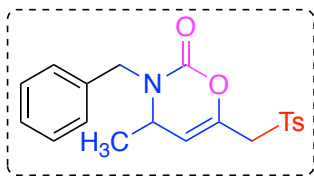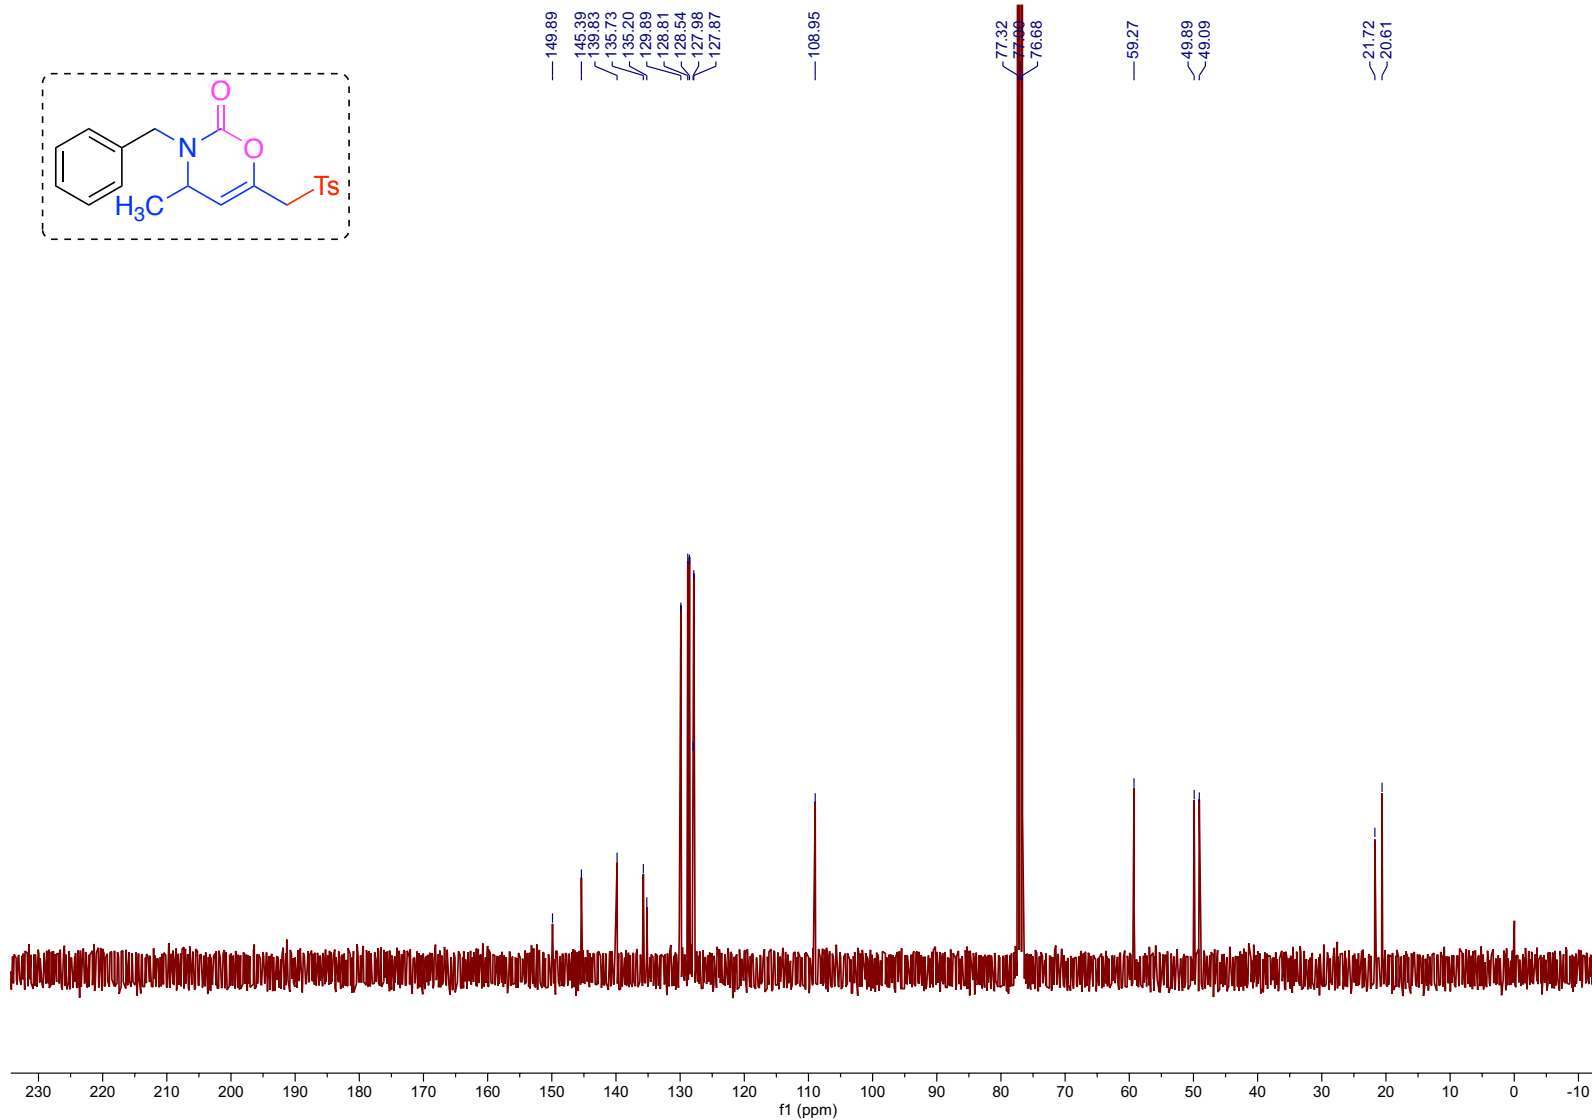

$^{13}\text{C}$  (101 MHz) spectrum of compound 4h in  $\text{CDCl}_3$

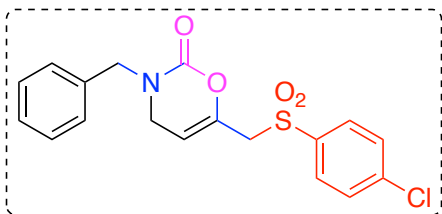

7.84  
7.82  
7.52  
7.50  
7.37  
7.36  
7.36  
7.35  
7.35  
7.34  
7.34  
7.33  
7.33  
7.32  
7.32  
7.26  
7.26  
7.24  
7.24  
5.25  
5.24  
5.24  
4.49  
3.86  
3.75  
3.74

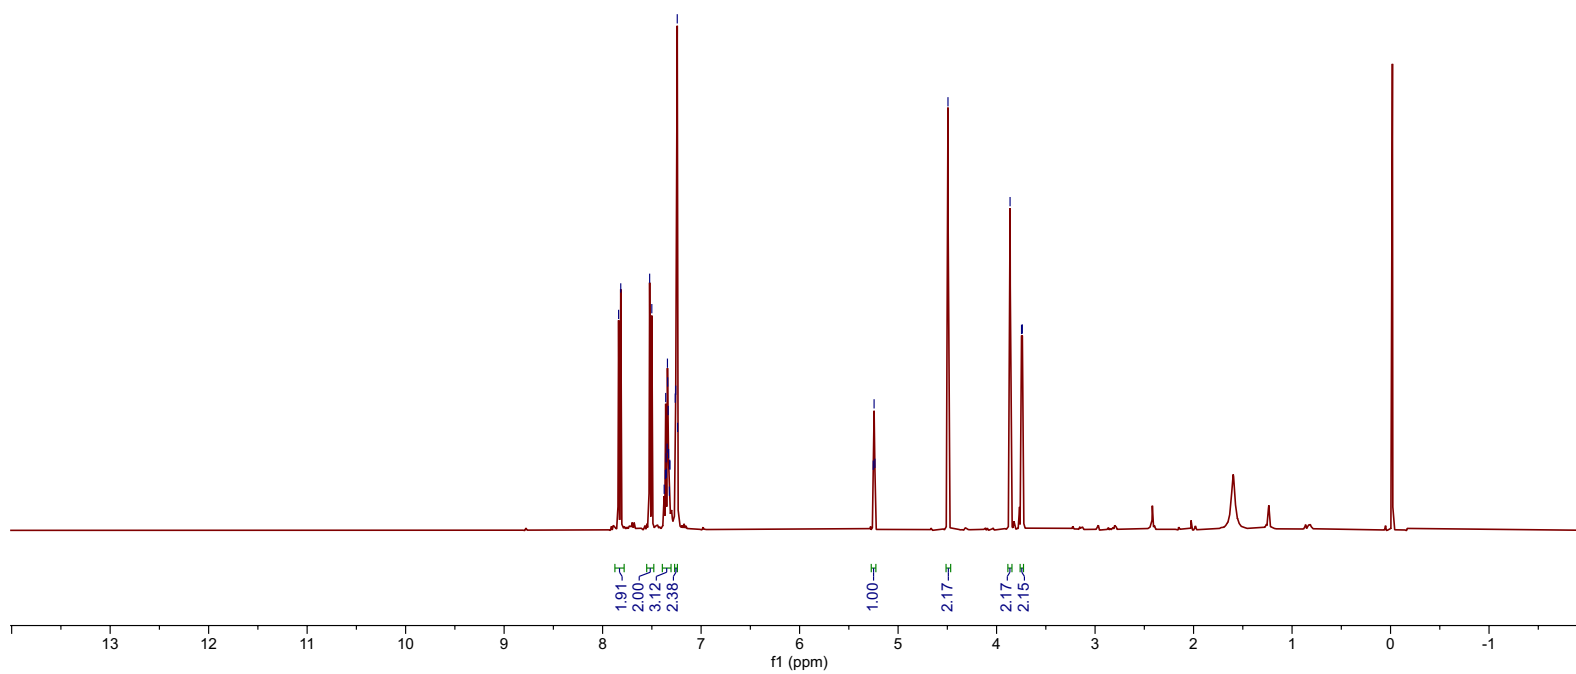

$^1\text{H}$  (400 MHz) spectrum of compound 4i in  $\text{CDCl}_3$

S71

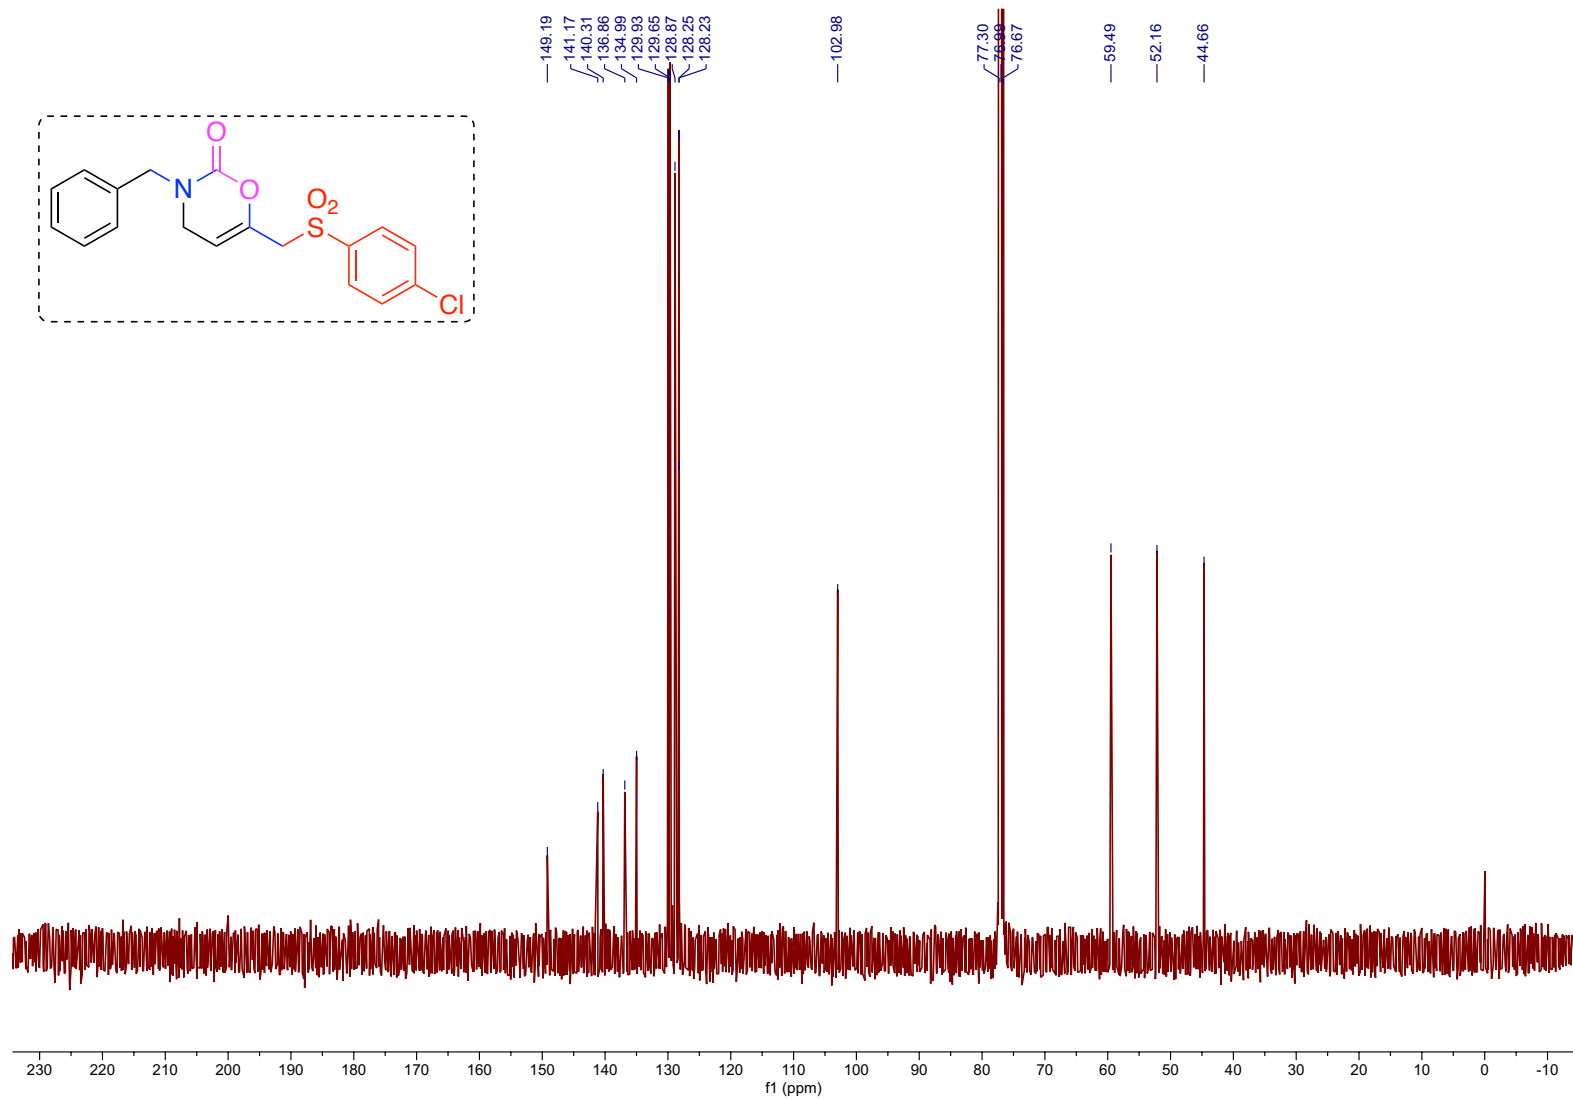

<sup>13</sup>C (101 MHz) spectrum of compound 4i in CDCl<sub>3</sub>

S72



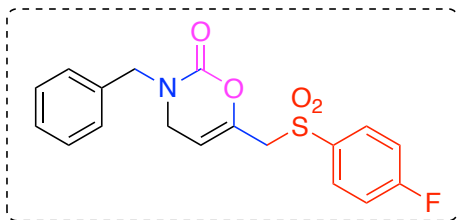

7.94  
7.93  
7.92  
7.91  
7.88  
7.37  
7.36  
7.36  
7.35  
7.35  
7.34  
7.33  
7.28  
7.27  
7.26  
7.26  
7.26  
7.24  
7.24  
7.23  
7.23  
7.22  
7.22  
7.21  
5.27  
5.26  
4.51  
3.88  
3.77  
3.76

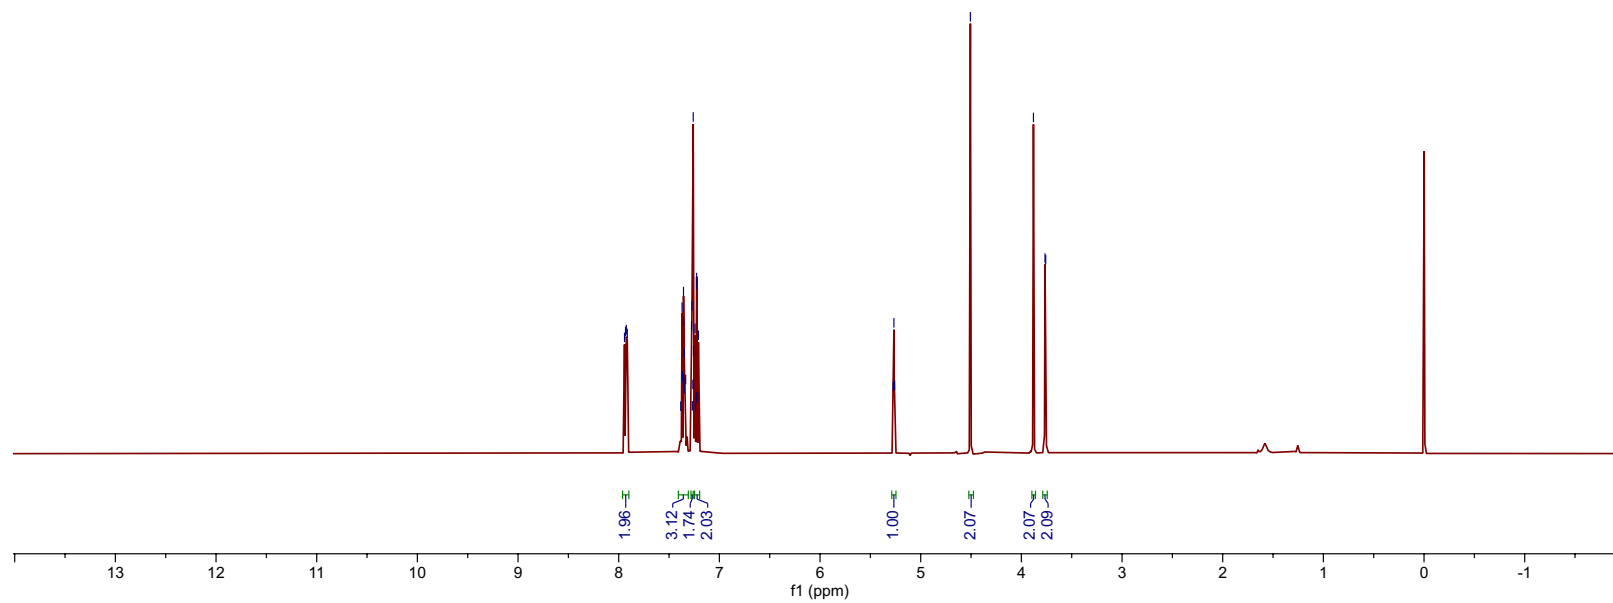

$^1\text{H}$  (500 MHz) spectrum of compound 4j in  $\text{CDCl}_3$

S73

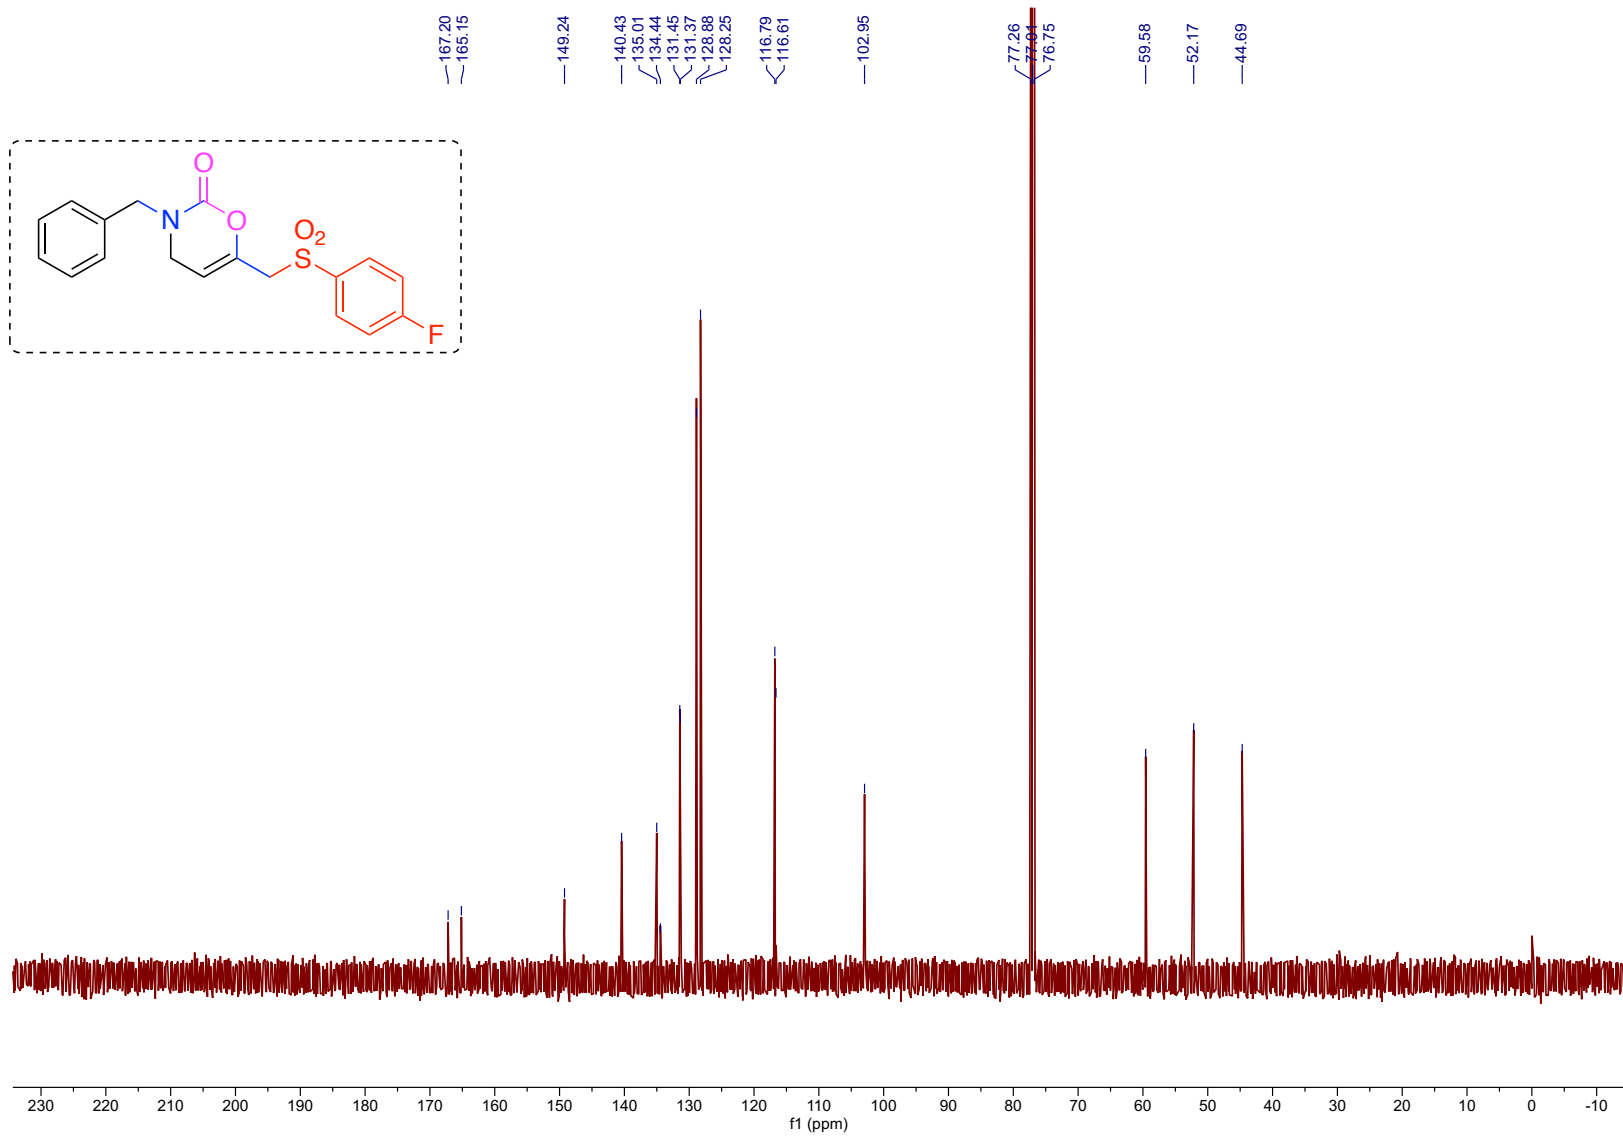

$^{13}\text{C}$  (126 MHz) spectrum of compound 4j in  $\text{CDCl}_3$

S74

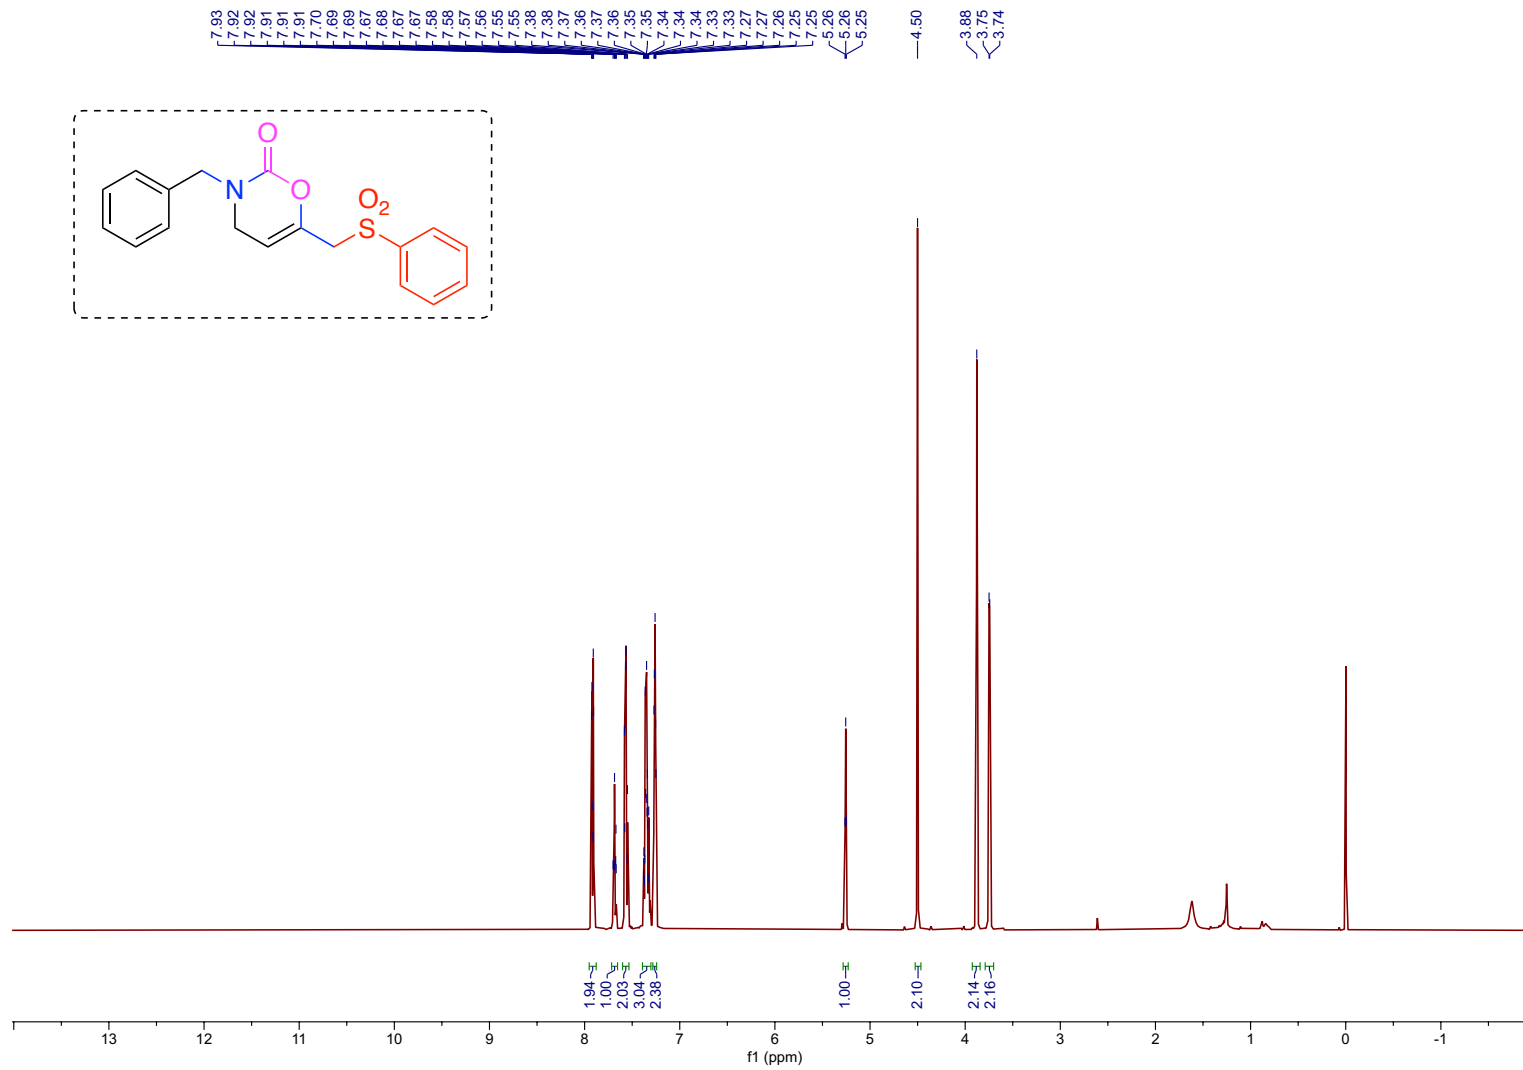

$^1\text{H}$  (500 MHz) spectrum of compound 4k in  $\text{CDCl}_3$

S75

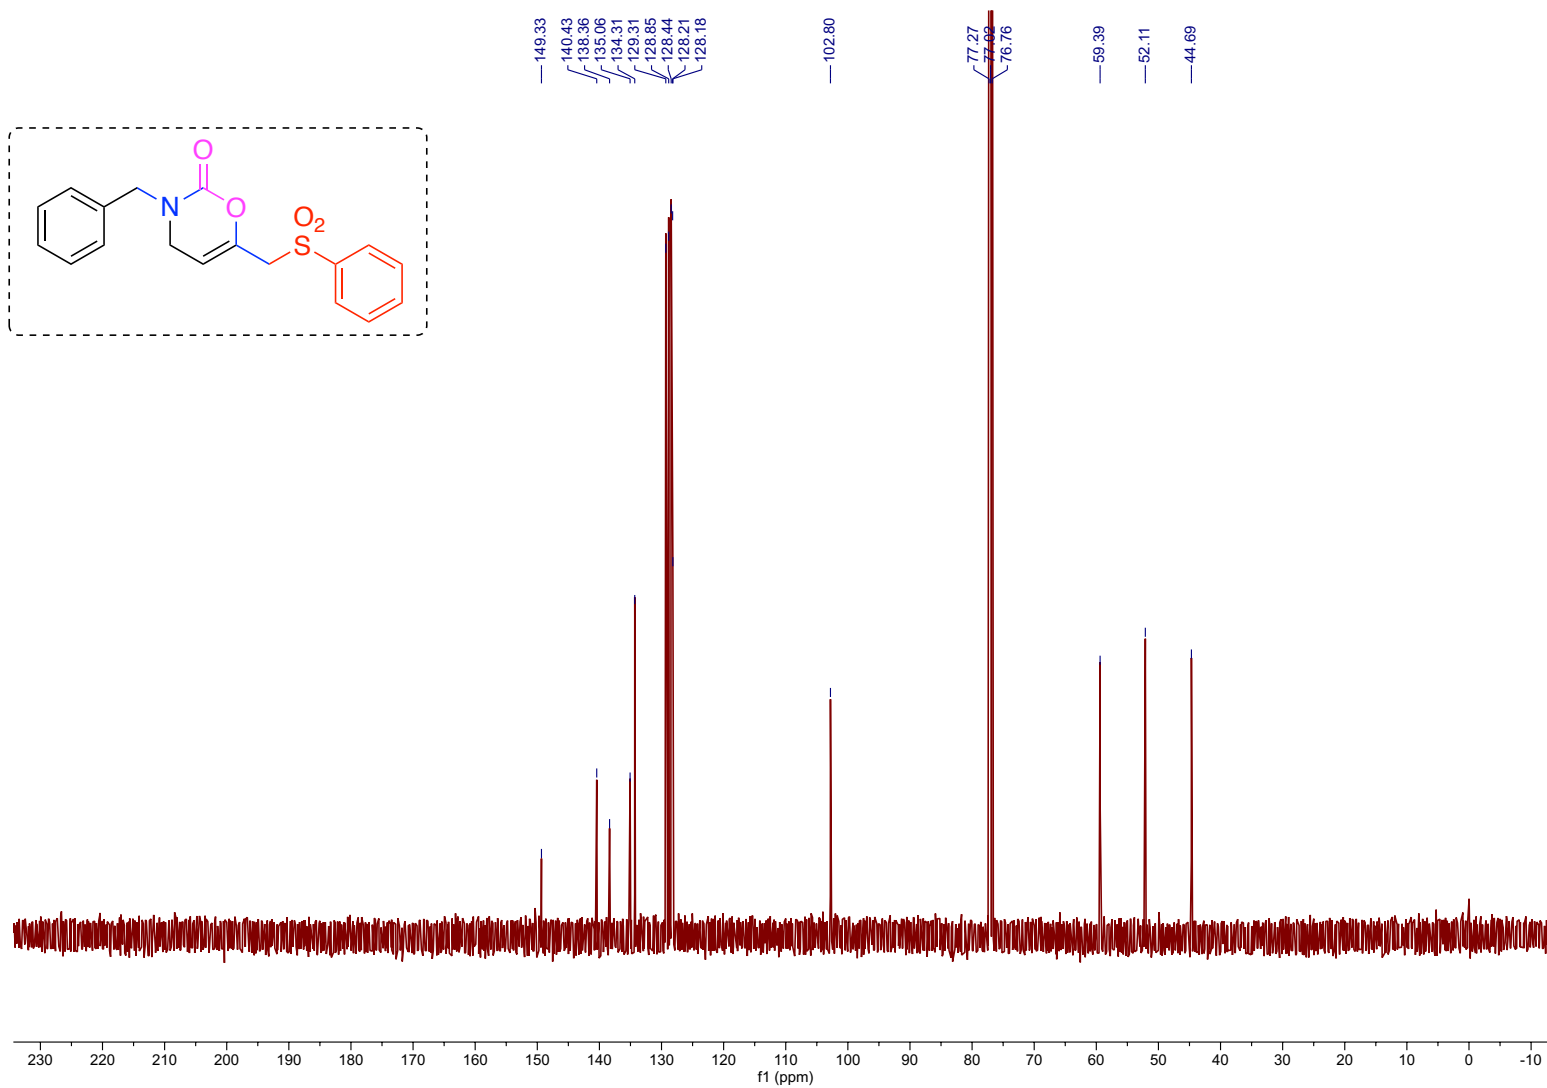

<sup>13</sup>C (126 MHz) spectrum of compound 4k in CDCl<sub>3</sub>

S76
